# Supplementary material for: Graded titin cleavage progressively reduces tension and uncovers the source of A-band stability in contracting muscle
Source: eLife. 2020 Dec 24;9:e64107. doi: 10.7554/eLife.64107 (PMC7781594; doi:10.7554/eLife.64107)
Supplement: Figure 1—source data 1. [file elife-64107-fig1-data1.xlsx]

## Sheet: Figure 1C
	Figure 1 C
	HaloTag signal intensity on IF images (a.u.)				Table Analyzed	Fig. 1 C
	WT	Het	Hom
	0	30964	59499		Column C	Hom
	0	35502	54745		vs.	vs.
	0	33189	57221		Column B	Het
	0	35442	57979
	0	35796	53426		Unpaired t test
	0	30265	55831		P value	<0.0001
	0	32836	57197		P value summary	***
	0	30990	54198		Significantly different (P < 0.05)?	Yes
	0	27621	55935		One- or two-tailed P value?	Two-tailed
	0	28615	53484		t, df	t=21.26, df=18
					How big is the difference?
					Mean of column B	32122
					Mean of column C	55952
					Difference between means (C - B) ± SEM	23830 ± 1121
					95% confidence interval	21474 to 26185
					R squared (eta squared)	0.9617
					F test to compare variances
					F, DFn, Dfd	2.067, 9, 9
					P value	0.2944
					P value summary	ns
					Significantly different (P < 0.05)?	No
					Data analyzed
					Sample size, column B	10
					Sample size, column C	10

## Sheet: Figure 1D
	Figure 1 D
	GP-HaloTag/sarcomere				Table Analyzed	Fig. 1 D
	WT	Het	Hom
	2	12	102		Column C	Hom
	5	45	78		vs.	vs.
	2	33	69		Column B	Het
	3	31	99
	0	24	65		Unpaired t test
	0	7	77		P value	<0.0001
	0	13	108		P value summary	***
	7	45	102		Significantly different (P < 0.05)?	Yes
	5	47	78		One- or two-tailed P value?	Two-tailed
	3	48	92		t, df	t=18.92, df=98
	10	49	93
	1	36	95		How big is the difference?
	3	32	95		Mean of column B	34.42
	2	30	88		Mean of column C	93.6
	2	38	119		Difference between means (C - B) ± SEM	59.18 ± 3.127
	1	24	123		95% confidence interval	52.97 to 65.39
	5	29	89		R squared (eta squared)	0.7851
	4	15	91
	0	17	98		F test to compare variances
	0	32	69		F, DFn, Dfd	1.496, 49, 49
	0	9	96		P value	0.1619
	0	33	95		P value summary	ns
	2	45	93		Significantly different (P < 0.05)?	No
	0	11	102
	4	17	106		Data analyzed
	1	54	107		Sample size, column B	50
	1	65	88		Sample size, column C	50
	0	62	89
	0	15	92
	3	28	69
	2	24	78
	5	56	115
	4	34	114
	0	15	103
	0	66	74
	0	84	69
	0	56	89
	0	54	91
	0	33	92
	0	24	123
	2	39	101
	2	36	88
	2	47	89
	0	41	89
	2	15	104
	1	19	106
	0	21	108
	0	24	100
	0	36	92
	0	51	88

## Sheet: Figure 1E
	Figure 1 E
	HaloTag signal in TEV-cut Het (%)
	48.425
	43.5267
	46.4205
	41.9593
	51.7408
	51.8011
	44.2803
	47.6714
	43.9035
	61.266
	47.9427
	41.2509
	39.9548
	51.2585
	47.1891
	43.2555
	42.2758
	47.0987
	44.3557
	42.9842
	42.0799
	45.1846
	44.7174
	41.8387
	45.7121
	46.1643
	55.2675
	56.1266
	51.1379
	50.3542
	45.7724
	49.9774
	48.4552
	49.1635
	50.3542
	51.5147
	50.2185
	50.1281
	50.098
	37.1063
	33.0068
	33.7604
	34.2879
	41.5222
	38.8395
	39.0806
	37.7393
	28.1688
	44.4009
	37.3625
	35.0264
	35.1168
	30.9118
	33.7754
	38.4627
	34.5742
	39.367
	38.5983
	38.5983
	37.1213
	36.5034
	36.5335
	30.7008
	37.6036
	41.6127

## Sheet: Figure 1E Gel
	Coomassie stained 1.8% polyacrylamide gel

## Sheet: Figure 1F
	Figure 1 F
	Relative HaloTag expression (%)				Table Analyzed	Fig. 1 F
	Het	Hom
	52.9427	88.2969			Table Analyzed	Fig. S1 E
	45.3206	74.4041
	53.6209	102.578			Column B	Hom
	40.7787	70.7693			vs.	vs.
	31.2296	65.0527			Column A	Het
	56.7464	138.613
	55.5304	117.487			Unpaired t test
	49.6043	108.675			P value	<0.0001
	54.5121	98.5575			P value summary	***
	48.2213	104.878			Significantly different (P < 0.05)?	Yes
	53.4423	106.028			One- or two-tailed P value?	Two-tailed
	48.1603	108.968			t, df	t=11.85, df=40
	48.7624	115.693
	42.0218				How big is the difference?
	50.2198				Mean of column A	49.86
	54.7886				Mean of column B	100
	49.523				Difference between means (B - A) ± SEM	50.14 ± 4.232
	59.5367				95% confidence interval	41.58 to 58.69
	59.7427				R squared (eta squared)	0.7782
	54.8271
	61.9342				F test to compare variances
	51.3886				F, DFn, Dfd	9.250, 12, 28
	57.0392				P value	<0.0001
	42.2446				P value summary	***
	46.9485				Significantly different (P < 0.05)?	Yes
	44.8006
	45.598				Data analyzed
	44.3659				Sample size, column A	29
	42.1989				Sample size, column B	13

## Sheet: Figure 1F Blot&Gel
	WB: anti HaloTag
	PVDF stain (Coomassie) of 1.8% polyacrylamide gel
