# Supplementary material for: Graded titin cleavage progressively reduces tension and uncovers the source of A-band stability in contracting muscle
Source: eLife. 2020 Dec 24;9:e64107. doi: 10.7554/eLife.64107 (PMC7781594; doi:10.7554/eLife.64107)
Supplement: Figure 2—source data 1. [file elife-64107-fig2-data1.xlsx]

## Sheet: Figure 2A
	Time(ms)	Force_Wt_-TEV(kPa)	Force_Wt_+TEV(kPa)		Time(ms)	Force_Het_-TEV(kPa)	Force_Het_+TEV(kPa)		Time(ms)	Force_Hom_-TEV(kPa)	Force_Hom_+TEV(kPa)
	0	0.803953	0.712456		0	-0.654974	0.479812		0	0.209035	0.104066
	1	0.923238	0.692575		1	-0.73781	0.797353		1	0.129512	0.210097
	2	0.98288	0.513648		2	-0.931096	1.03206		2	0.262051	0.28962
	3	0.605145	0.0762697		3	-0.848259	0.852577		3	0.182528	0.157081
	4	-0.110565	-0.440632		4	-0.66878	0.286527		4	0.0764967	-0.00196515
	5	-0.647347	-0.778606		5	-0.254596	-0.113851		5	0.0499889	-0.134504
	6	-0.905798	-0.798487		6	0.32526	-0.362361		6	-0.135565	-0.214027
	7	-1.08473	-0.679202		7	0.863699	-0.707514		7	-0.294612	-0.0284729
	8	-0.826275	-0.361108		8	0.863699	-0.831769		8	-0.241596	-0.0814884
	9	-0.22985	0.215435		9	0.642801	-0.528034		9	-0.0825499	-0.134504
	10	0.50574	0.772099		10	0.339067	0.0104042		10	0.103004	-0.346566
	11	0.644906	1.05043		11	-0.0336985	0.396975		11	0.209035	-0.187519
	12	0.803953	0.891384		12	-0.599749	0.659292		12	0.262051	0.0510504
	13	0.923238	0.57329		13	-0.875872	0.838771		13	0.209035	0.263112
	14	0.724429	0.0563888		14	-0.862066	0.797353		14	0.103004	0.448667
	15	0.0683622	-0.520155		15	-0.558331	0.507424		15	-0.0560421	0.28962
	16	-0.408778	-0.937652		16	-0.296015	0.0794348		16	-0.00302659	-0.161012
	17	-0.567824	-1.05694		17	0.228618	-0.459004		17	-0.0560421	-0.53212
	18	-0.587705	-0.798487		18	0.642801	-0.886993		18	-0.0825499	-0.585136
	19	-0.567824	-0.380989		19	0.75325	-1.17692		19	-0.135565	-0.373074
	20	-0.309373	0.235316		20	0.490934	-1.03886		20	-0.135565	0.0510504
	21	0.00871976	0.931145		21	0.25623	-0.569453		21	-0.0560421	0.369143
	22	0.207528	1.30888		22	0.035332	0.0794348		22	-0.00302659	0.342636
	23	0.306932	1.14983		23	-0.351239	0.645486		23	0.0234812	0.0510504
	24	0.525621	0.672694		24	-0.724004	1.10109		24	0.341574	-0.107996
	25	0.585264	0.155793		25	-0.696392	1.23915		25	0.288559	-0.0814884
	26	0.426217	-0.520155		26	-0.406464	1.00444		26	0.0234812	0.0510504
	27	0.147886	-1.0967		27	-0.144147	0.300333		27	-0.0825499	0.395651
	28	-0.0310419	-1.25575		28	0.035332	-0.334749		28	-0.188581	0.342636
	29	-0.130446	-0.838248		29	0.435709	-0.831769		29	-0.188581	-0.00196515
	30	-0.289493	-0.361108		30	0.601383	-1.14931		30	-0.135565	-0.267043
	31	-0.428658	0.195555		31	0.477128	-1.17692		31	-0.0295343	-0.558628
	32	-0.309373	0.871503		32	0.173393	-0.748932		32	-0.0295343	-0.187519
	33	0.00871976	1.26912		33	0.0629443	0.0380164		33	-0.0560421	0.263112
	34	0.207528	1.09019		34	-0.213178	0.686904		34	0.0764967	0.501682
	35	0.446098	0.593171		35	-0.558331	1.14251		35	-0.0295343	0.342636
	36	0.644906	0.155793		36	-0.724004	1.28057		36	0.15602	0.0775581
	37	0.843714	-0.40087		37	-0.530719	1.01825		37	0.235543	-0.134504
	38	0.545502	-0.977414		38	-0.42027	0.245108		38	0.15602	-0.0814884
	39	0.207528	-1.05694		39	-0.185566	-0.54184		39	0.0499889	0.0245426
	40	-0.0310419	-0.63944		40	0.104363	-1.1217		40	-0.188581	0.183589
	41	-0.329254	-0.122539		41	0.477128	-1.31498		41	-0.32112	0.0510504
	42	-0.786513	0.294959		42	0.477128	-1.25976		42	-0.0825499	-0.161012
	43	-0.94556	0.752218		43	0.408097	-0.638483		43	-0.0560421	-0.187519
	44	-0.607586	1.05043		44	0.242424	0.148465		44	-0.0560421	-0.0814884
	45	-0.130446	0.871503		45	0.118169	0.824965		45	0.103004	0.210097
	46	0.108124	0.394363		46	-0.226984	1.08728		46	0.0764967	0.581205
	47	0.446098	-0.0628961		47	-0.406464	1.19773		47	0.0234812	0.448667
	48	0.784072	-0.420751		48	-0.475494	0.852577		48	0.182528	0.157081
	49	0.784072	-0.778606		49	-0.296015	0.176078		49	0.15602	-0.0284729
	50	0.426217	-0.897891		50	-0.213178	-0.514228		50	0.235543	-0.107996
	51	0.0286006	-0.659321		51	-0.00608631	-0.886993		51	0.0234812	-0.0814884
	52	-0.289493	-0.221943		52	0.201005	-1.09409		52	-0.294612	-0.0814884
	53	-0.746752	0.135912		53	0.477128	-1.16312		53	-0.559689	0.0510504
	54	-1.02508	0.434125		54	0.394291	-0.679902		54	-0.374135	-0.00196515
	55	-0.885917	0.732337		55	0.283842	0.0380164		55	-0.0825499	-0.0284729
	56	-0.448539	0.851622		56	0.0629443	0.631679		56	0.262051	-0.00196515
	57	0.0286006	0.652814		57	-0.0751169	0.811159		57	0.421097	-0.00196515
	58	0.625025	0.255197		58	-0.544525	1.01825		58	0.209035	0.183589
	59	1.14193	-0.0628961		59	-0.73781	0.824965		59	-0.0295343	0.263112
	60	1.24133	-0.321347		60	-0.862066	0.355557		60	-0.162073	0.0775581
	61	0.764191	-0.500274		61	-0.572137	-0.29333		61	0.0234812	-0.134504
	62	0.147886	-0.480393		62	-0.351239	-0.514228		62	0.0764967	-0.187519
	63	-0.488301	-0.321347		63	0.159587	-0.817963		63	0.0764967	-0.134504
	64	-1.06484	-0.0628961		64	0.559964	-0.859381		64	-0.0825499	0.0245426
	65	-1.38294	0.0563888		65	0.863699	-0.652289		65	-0.32112	-0.00196515
	66	-1.16425	0.255197		66	0.836087	0.0242103		66	-0.374135	-0.214027
	67	-0.587705	0.414244		67	0.698026	0.396975		67	-0.0295343	-0.320058
	68	0.0484814	0.374482		68	0.25623	0.645486		68	0.15602	-0.0549807
	69	0.724429	0.195555		69	-0.24079	0.783547		69	0.39459	0.236605
	70	1.24133	0.0166272		70	-0.641168	0.866383		70	0.527128	0.395651
	71	1.32085	-0.0628961		71	-0.765423	0.493618		71	0.315066	0.316128
	72	0.863595	-0.202062		72	-0.641168	-0.113851		72	0.15602	-0.134504
	73	0.0683622	-0.440632		73	-0.392658	-0.555647		73	-0.00302659	-0.346566
	74	-0.647347	-0.500274		74	0.0905565	-0.817963		74	-0.268104	-0.29355
	75	-1.08473	-0.500274		75	0.490934	-0.873187		75	-0.400643	-0.187519
	76	-1.12449	-0.281585		76	0.780862	-0.873187		76	-0.268104	0.104066
	77	-0.786513	0.0762697		77	0.739444	-0.417585		77	-0.0825499	0.0245426
	78	-0.22985	0.513648		78	0.601383	0.0380164		78	0.262051	-0.0814884
	79	0.446098	0.791979		79	0.145781	0.548843		79	0.235543	-0.0814884
	80	1.00276	0.791979		80	-0.392658	0.590261		80	0.129512	-0.0284729
	81	1.18169	0.752218		81	-0.903484	0.755935		81	0.129512	0.104066
	82	1.10217	0.593171		82	-1.05535	0.576455		82	0.0764967	0.28962
	83	0.74431	0.0961505		83	-0.986321	0.383169		83	0.0499889	0.236605
	84	0.167766	-0.460513		84	-0.654974	-0.127657		84	0.0499889	0.0245426
	85	-0.408778	-0.818367		85	-0.0751169	-0.320943		85	-0.135565	-0.134504
	86	-0.766632	-0.818367		86	0.601383	-0.47281		86	-0.347627	-0.29355
	87	-0.885917	-0.758725		87	0.891311	-0.555647		87	-0.374135	-0.320058
	88	-0.746752	-0.40087		88	0.849893	-0.597065		88	-0.268104	-0.107996
	89	-0.269612	0.215435		89	0.587577	-0.238106		89	-0.0825499	0.104066
	90	0.406336	0.81186		90	0.25623	0.176078		90	0.235543	0.316128
	91	0.843714	0.951026		91	-0.365045	0.493618		91	0.368082	0.130574
	92	0.962999	0.732337		92	-0.765423	0.617873		92	0.421097	0.0510504
	93	0.943119	0.374482		93	-0.848259	0.742128		93	0.103004	0.0510504
	94	0.684668	-0.142419		94	-0.585943	0.631679		94	-0.188581	0.130574
	95	0.128005	-0.699083		95	-0.42027	0.148465		95	-0.241596	0.130574
	96	-0.349135	-1.05694		96	-0.0198924	-0.334749		96	-0.109058	0.0775581
	97	-0.607586	-0.997295		97	0.449516	-0.707514		97	0.0234812	-0.0284729
	98	-0.647347	-0.659321		98	0.794668	-0.997442		98	-0.0560421	-0.161012
	99	-0.627467	-0.221943		99	0.698026	-1.14931		99	-0.0560421	-0.187519
	100	-0.349135	0.31484		100	0.408097	-0.831769		100	-0.0560421	-0.161012
	101	-0.0509227	0.911264		101	0.118169	-0.141463		101	-0.135565	-0.0284729
	102	0.187647	1.22936		102	-0.254596	0.424588		102	0.0499889	0.157081
	103	0.346694	0.990788		103	-0.627362	0.797353		103	0.288559	0.28962
	104	0.545502	0.533529		104	-0.834453	1.10109		104	0.368082	0.395651
	105	0.465979	-0.00325364		105	-0.696392	1.15631		105	0.235543	0.28962
	106	0.207528	-0.540036		106	-0.42027	0.659292		106	-0.0825499	0.130574
	107	-0.150327	-1.13646		107	-0.102729	-0.141463		107	-0.215089	-0.107996
	108	-0.289493	-1.25575		108	0.25623	-0.72132		108	-0.374135	-0.29355
	109	-0.428658	-0.917772		109	0.573771	-1.14931		109	-0.347627	-0.29355
	110	-0.408778	-0.380989		110	0.628995	-1.25976		110	-0.00302659	-0.0284729
	111	-0.309373	0.155793		111	0.421903	-0.928412		111	0.0764967	0.0510504
	112	-0.190088	0.791979		112	0.145781	-0.196688		112	0.0499889	0.0510504
	113	-0.0509227	1.14983		113	-0.102729	0.535037		113	0.0764967	0.0245426
	114	0.167766	0.931145		114	-0.42027	0.935414		114	0.15602	0.0775581
	115	0.48586	0.434125		115	-0.682586	1.22534		115	0.235543	0.236605
	116	0.605145	-0.0231345		116	-0.682586	1.08728		116	0.103004	0.263112
	117	0.565383	-0.520155		117	-0.475494	0.507424		117	0.0764967	0.157081
	118	0.406336	-1.03706		118	-0.226984	-0.265718		118	-0.00302659	0.0510504
	119	0.147886	-1.21598		119	0.0629443	-0.914606		119	-0.215089	-0.240535
	120	-0.249731	-0.858129		120	0.352873	-1.10789		120	-0.32112	-0.346566
	121	-0.587705	-0.361108		121	0.546158	-1.17692		121	-0.162073	-0.240535
	122	-0.766632	0.175674		122	0.518546	-0.72132		122	0.182528	-0.0284729
	123	-0.806394	0.692575		123	0.352873	-0.2243		123	0.103004	0.210097
	124	-0.647347	1.05043		124	0.145781	0.535037		124	0.0499889	0.210097
	125	-0.170208	0.931145		125	-0.199372	0.935414		125	0.0499889	0.104066
	126	0.306932	0.394363		126	-0.392658	1.25295		126	-0.00302659	0.0510504
	127	0.664787	-0.142419		127	-0.461688	1.05967		127	0.129512	0.0245426
	128	0.823834	-0.559917		128	-0.337433	0.686904		128	0.235543	0.130574
	129	0.962999	-0.798487		129	-0.24079	-0.0310141		129	-0.0560421	-0.00196515
	130	0.664787	-0.87801		130	-0.0198924	-0.54184		130	-0.0295343	-0.134504
	131	0.0882431	-0.579798		131	0.201005	-1.02505		131	-0.0825499	-0.29355
	132	-0.388897	-0.142419		132	0.366679	-1.06647		132	-0.188581	-0.346566
	133	-0.607586	0.215435		133	0.297648	-1.01125		133	-0.215089	-0.267043
	134	-0.687109	0.473886		134	0.297648	-0.376167		134	-0.135565	-0.0284729
	135	-0.627467	0.732337		135	0.201005	0.300333		135	-0.0560421	0.157081
	136	-0.150327	0.851622		136	-0.0475047	0.935414		136	-0.00302659	0.130574
	137	0.48586	0.533529		137	-0.378851	1.04586		137	0.15602	0.0510504
	138	1.00276	0.0563888		138	-0.530719	0.963026		138	0.341574	-0.0284729
	139	1.24133	-0.241824		139	-0.530719	0.604067		139	0.262051	-0.0549807
	140	1.22145	-0.361108		140	-0.627362	0.0380164		140	0.182528	0.104066
	141	0.803953	-0.460513		141	-0.544525	-0.597065		141	-0.0560421	0.0245426
	142	0.128005	-0.440632		142	-0.199372	-0.96983		142	-0.294612	-0.0549807
	143	-0.528063	-0.221943		143	0.242424	-1.06647		143	-0.241596	-0.107996
	144	-1.0052	-0.0231345		144	0.421903	-0.942218		144	-0.0560421	-0.240535
	145	-1.14437	0.0961505		145	0.532352	-0.431392		145	-0.0295343	-0.346566
	146	-0.905798	0.175674		146	0.628995	0.258914		146	0.0499889	-0.214027
	147	-0.349135	0.374482		147	0.463322	0.797353		147	-0.0295343	0.0775581
	148	0.326813	0.354601		148	-0.0198924	0.88019		148	-0.0825499	0.395651
	149	0.923238	0.195555		149	-0.434076	0.88019		149	0.103004	0.316128
	150	1.30097	-0.0231345		150	-0.66878	0.617873		150	0.447605	0.183589
	151	1.16181	-0.102658		151	-0.73781	0.120853		151	0.580144	0.0510504
	152	0.664787	-0.301466		152	-0.751617	-0.569453		152	0.129512	-0.161012
	153	-0.0111611	-0.420751		153	-0.309821	-0.804157		153	-0.400643	-0.187519
	154	-0.647347	-0.500274		154	0.283842	-0.831769		154	-0.745244	-0.107996
	155	-1.20401	-0.380989		155	0.725638	-0.638483		155	-0.586197	-0.0814884
	156	-1.26365	-0.281585		156	0.794668	-0.47281		156	-0.188581	-0.00196515
	157	-0.826275	0.036508		157	0.725638	0.0518226		157	0.368082	0.0510504
	158	-0.190088	0.434125		158	0.408097	0.396975		158	0.421097	-0.0284729
	159	0.406336	0.712456		159	-0.157954	0.576455		159	0.15602	0.183589
	160	0.98288	0.692575		160	-0.751617	0.562649		160	-0.135565	0.130574
	161	1.34074	0.57329		161	-0.986321	0.604067		161	-0.0825499	-0.0284729
	162	1.04252	0.294959		162	-0.862066	0.4522		162	0.103004	0.157081
	163	0.426217	-0.202062		163	-0.682586	0.0104042		163	0.315066	0.316128
	164	-0.190088	-0.659321		164	-0.268403	-0.348555		164	0.15602	0.130574
	165	-0.607586	-0.838248		165	0.242424	-0.555647		165	-0.215089	0.0245426
	166	-1.14437	-0.838248		166	0.794668	-0.666096		166	-0.533182	-0.214027
	167	-1.26365	-0.738844		167	0.808475	-0.666096		167	-0.453658	-0.505612
	168	-0.905798	-0.361108		168	0.698026	-0.417585		168	-0.162073	-0.240535
	169	-0.269612	0.235316		169	0.449516	0.0794348		169	0.182528	0.236605
	170	0.207528	0.632933		170	0.173393	0.369363		170	0.421097	0.369143
	171	0.446098	0.752218		171	-0.365045	0.673098		171	0.235543	0.316128
	172	0.784072	0.652814		172	-0.696392	0.783547		172	0.262051	0.130574
	173	0.724429	0.354601		173	-0.73781	0.769741		173	0.103004	0.0775581
	174	0.366575	-0.281585		174	-0.572137	0.300333		174	-0.241596	0.130574
	175	-0.190088	-0.798487		175	-0.309821	-0.0862386		175	-0.162073	0.157081
	176	-0.488301	-0.977414		176	0.145781	-0.528034		176	-0.188581	-0.0284729
	177	-0.687109	-0.897891		177	0.559964	-0.748932		177	-0.32112	-0.267043
	178	-0.866037	-0.718963		178	0.656607	-0.983636		178	-0.215089	-0.240535
	179	-0.766632	-0.202062		179	0.573771	-0.762738		179	-0.215089	-0.134504
	180	-0.289493	0.553409		180	0.32526	-0.376167		180	0.0764967	-0.107996
	181	0.167766	1.12995		181	0.0905565	0.176078		181	0.341574	0.104066
	182	0.366575	1.24924		182	-0.406464	0.604067		182	0.341574	0.236605
	183	0.525621	1.03055		183	-0.710198	0.94922		183	0.315066	0.263112
	184	0.684668	0.613052		184	-0.889678	0.990638		184	0.15602	0.316128
	185	0.625025	-0.0430153		185	-0.724004	0.769741		185	-0.162073	0.104066
	186	0.147886	-0.778606		186	-0.392658	0.20369		186	-0.241596	-0.187519
	187	-0.269612	-1.17622		187	0.118169	-0.320943		187	-0.215089	-0.29355
	188	-0.369016	-1.11658		188	0.559964	-0.817963		188	-0.0825499	-0.240535
	189	-0.369016	-0.778606		189	0.863699	-1.05267		189	0.0499889	-0.161012
	190	-0.388897	-0.341228		190	0.849893	-0.983636		190	0.0499889	-0.0549807
	191	-0.329254	0.255197		191	0.587577	-0.486616		191	0.0234812	-0.0814884
	192	0.0286006	0.871503		192	0.131975	0.134659		192	0.0499889	0.0245426
	193	0.287051	1.01067		193	-0.351239	0.631679		193	0.209035	0.0510504
	194	0.386455	0.732337		194	-0.654974	0.935414		194	0.341574	-0.0284729
	195	0.545502	0.33472		195	-0.765423	1.08728		195	0.129512	-0.00196515
	196	0.684668	-0.0628961		196	-0.572137	0.88019		196	0.0234812	0.157081
	197	0.585264	-0.679202		197	-0.282209	0.286527		197	-0.0825499	0.183589
	198	0.287051	-1.05694		198	0.159587	-0.362361		198	-0.109058	-0.0549807
	199	0.167766	-0.87801		199	0.421903	-0.942218		199	0.0234812	-0.346566
	200	-0.0310419	-0.540036		200	0.546158	-1.27356		200	0.0764967	-0.399581
	201	-0.488301	-0.341228		201	0.477128	-1.27356		201	-0.00302659	-0.426089
	202	-0.866037	0.195555		202	0.283842	-0.72132		202	-0.162073	-0.0814884
	203	-0.746752	0.951026		203	-0.0198924	0.0794348		203	-0.215089	0.210097
	204	-0.488301	1.32876		204	-0.323627	0.714516		204	0.0499889	0.210097
	205	-0.22985	0.911264		205	-0.503107	1.18392		205	0.474113	0.183589
	206	0.147886	0.473886		206	-0.434076	1.33579		206	0.474113	0.157081
	207	0.664787	0.0961505		207	-0.434076	1.05967		207	0.209035	-0.00196515
	208	0.883476	-0.579798		208	-0.254596	0.300333		208	-0.0295343	-0.00196515
	209	0.823834	-1.07682		209	-0.116535	-0.486616		209	-0.32112	-0.0284729
	210	0.664787	-0.937652		210	0.118169	-0.914606		210	-0.268104	-0.134504
	211	0.187647	-0.40087		211	0.242424	-1.14931		211	-0.00302659	-0.240535
	212	-0.508182	-0.182181		212	0.339067	-1.16312		212	0.129512	-0.214027
	213	-1.0052	0.0961505		213	0.435709	-0.776544		213	-0.0825499	-0.161012
	214	-1.0052	0.712456		214	0.380485	-0.00340191		214	-0.215089	-0.00196515
	215	-0.667228	0.951026		215	0.297648	0.755935		215	-0.0825499	0.342636
	216	-0.22985	0.473886		216	0.0215259	1.11489		216	0.182528	0.448667
	217	0.406336	0.135912		217	-0.17176	1.19773		217	0.39459	0.316128
	218	0.943119	0.116031		218	-0.544525	0.935414		218	0.209035	-0.0549807
	219	1.22145	-0.221943		219	-0.572137	0.327945		219	-0.109058	-0.240535
	220	1.08228	-0.818367		220	-0.641168	-0.459004		220	-0.347627	-0.0549807
	221	0.605145	-0.758725		221	-0.282209	-0.942218		221	-0.294612	0.104066
	222	-0.110565	-0.1623		222	0.00771981	-1.19073		222	-0.188581	0.183589
	223	-0.826275	-0.0430153		223	0.463322	-1.08028		223	-0.0295343	-0.0284729
	224	-1.20401	-0.142419		224	0.615189	-0.707514		224	0.0499889	-0.267043
	225	-1.28353	0.235316		225	0.767056	0.107047		225	0.0234812	-0.134504
	226	-0.965441	0.553409		226	0.601383	0.714516		226	-0.188581	0.0510504
	227	-0.408778	0.31484		227	0.25623	1.07348		227	-0.215089	0.448667
	228	0.326813	0.0563888		228	-0.254596	1.11489		228	0.0234812	0.369143
	229	0.943119	0.275078		229	-0.544525	0.935414		229	0.129512	0.157081
	230	1.26121	0.235316		230	-0.599749	0.424588		230	0.368082	0.0245426
	231	1.08228	-0.380989		231	-0.585943	-0.196688		231	0.288559	-0.0814884
	232	0.48586	-0.579798		232	-0.296015	-0.679902		232	-0.0560421	-0.0549807
	233	-0.249731	-0.281585		233	0.104363	-0.900799		233	-0.32112	0.0510504
	234	-0.726871	-0.221943		234	0.490934	-0.900799		234	-0.506674	-0.107996
	235	-1.02508	-0.559917		235	0.615189	-0.583259		235	-0.427151	-0.161012
	236	-1.14437	-0.301466		236	0.68422	-0.0862386		236	-0.0560421	-0.161012
	237	-0.866037	0.414244		237	0.615189	0.314139		237	0.315066	-0.0814884
	238	-0.249731	0.632933		238	0.242424	0.631679		238	0.315066	0.104066
	239	0.465979	0.493767		239	-0.282209	0.70071		239	0.129512	0.210097
	240	0.923238	0.553409		240	-0.682586	0.673098		240	0.103004	0.316128
	241	1.24133	0.672694		241	-0.73781	0.383169		241	-0.0295343	0.263112
	242	1.12205	0.116031		242	-0.73781	0.0518226		242	0.15602	-0.0284729
	243	0.565383	-0.520155		243	-0.461688	-0.348555		243	0.129512	-0.134504
	244	-0.150327	-0.599678		244	-0.088923	-0.638483		244	-0.135565	-0.267043
	245	-0.647347	-0.480393		245	0.435709	-0.707514		245	-0.162073	-0.240535
	246	-1.02508	-0.679202		246	0.68422	-0.624677		246	-0.294612	-0.107996
	247	-1.24377	-0.619559		247	0.780862	-0.362361		247	-0.241596	0.0245426
	248	-1.0052	0.0563888		248	0.68422	-0.0724325		248	0.209035	0.104066
	249	-0.269612	0.593171		249	0.463322	0.369363		249	0.447605	0.130574
	250	0.426217	0.593171		250	0.00771981	0.590261		250	0.421097	0.104066
	251	0.903357	0.593171		251	-0.503107	0.742128		251	0.235543	0.0775581
	252	1.16181	0.791979		252	-0.806841	0.604067		252	0.103004	0.130574
	253	1.16181	0.414244		253	-0.848259	0.4522		253	0.0234812	0.183589
	254	0.644906	-0.460513		254	-0.599749	0.0242103		254	-0.0825499	0.0510504
	255	0.0484814	-0.937652		255	-0.254596	-0.251912		255	0.0764967	-0.107996
	256	-0.428658	-0.818367		256	0.32526	-0.624677		256	0.0764967	-0.240535
	257	-0.687109	-0.699083		257	0.75325	-0.693708		257	-0.241596	-0.320058
	258	-0.866037	-0.659321		258	0.946536	-0.707514		258	-0.32112	-0.240535
	259	-0.647347	-0.102658		259	0.739444	-0.307136		259	-0.0295343	-0.0814884
	260	-0.170208	0.692575		260	0.380485	0.0932409		260	0.15602	0.157081
	261	0.227409	1.12995		261	-0.144147	0.521231		261	0.606652	0.236605
	262	0.446098	1.14983		262	-0.599749	0.742128		262	0.39459	0.236605
	263	0.565383	1.09019		263	-0.848259	0.893996		263	-0.135565	-0.00196515
	264	0.585264	0.772099		264	-0.751617	0.742128		264	-0.109058	-0.214027
	265	0.406336	-0.122539		265	-0.434076	0.424588		265	-0.0825499	-0.0549807
	266	0.0484814	-0.977414		266	-0.0336985	-0.113851		266	-0.135565	0.130574
	267	-0.269612	-1.23586		267	0.463322	-0.500422		267	0.0499889	0.0775581
	268	-0.46842	-1.0967		268	0.780862	-0.942218		268	-0.0295343	-0.107996
	269	-0.547943	-0.897891		269	0.960342	-0.96983		269	-0.294612	-0.53212
	270	-0.547943	-0.380989		270	0.656607	-0.748932		270	-0.162073	-0.53212
	271	-0.528063	0.533529		271	0.339067	-0.100045		271	0.0499889	-0.0549807
	272	-0.269612	1.16972		272	-0.144147	0.286527		272	0.447605	0.554698
	273	-0.0111611	1.09019		273	-0.434076	0.769741		273	0.606652	0.872791
	274	0.187647	0.732337		274	-0.724004	0.935414		274	0.262051	0.448667
	275	0.287051	0.33472		275	-0.724004	1.05967		275	-0.0295343	-0.187519
	276	0.48586	-0.281585		276	-0.530719	0.507424		276	-0.188581	-0.585136
	277	0.465979	-0.997295		277	-0.17176	-0.0448203		277	-0.427151	-0.426089
	278	0.26717	-1.1961		278	0.173393	-0.679902		278	-0.215089	0.0775581
	279	-0.0509227	-0.917772		279	0.490934	-1.02505		279	0.0499889	0.28962
	280	-0.269612	-0.559917		280	0.532352	-1.19073		280	-0.109058	0.130574
	281	-0.528063	-0.182181		281	0.394291	-0.831769		281	-0.00302659	-0.0284729
	282	-0.726871	0.57329		282	0.201005	-0.182881		282	0.0764967	-0.240535
	283	-0.647347	1.26912		283	-0.0475047	0.438394		283	0.0499889	-0.214027
	284	-0.408778	1.30888		284	-0.309821	0.963026		284	0.103004	0.0245426
	285	-0.170208	0.851622		285	-0.516913	1.29437		285	0.129512	0.395651
	286	0.128005	0.434125		286	-0.42027	1.33579		286	-0.0295343	0.554698
	287	0.50574	-0.0231345		287	-0.323627	0.728322		287	-0.0825499	0.210097
	288	0.724429	-0.659321		288	-0.213178	0.0380164		288	-0.162073	-0.267043
	289	0.585264	-1.0967		289	-0.0198924	-0.707514		289	-0.162073	-0.479105
	290	0.346694	-0.937652		290	0.339067	-1.03886		290	-0.0560421	-0.240535
	291	-0.0708035	-0.520155		291	0.518546	-1.3564		291	0.0499889	-0.0549807
	292	-0.528063	-0.221943		292	0.559964	-0.983636		292	0.0234812	0.130574
	293	-0.885917	0.0961505		293	0.518546	-0.486616		293	-0.0295343	0.130574
	294	-0.885917	0.593171		294	0.50474	0.355557		294	-0.00302659	-0.0549807
	295	-0.547943	0.851622		295	0.214812	0.824965		295	0.0234812	-0.0814884
	296	-0.150327	0.613052		296	-0.130341	1.21154		296	-0.00302659	0.157081
	297	0.446098	0.215435		297	-0.434076	1.05967		297	0.129512	0.369143
	298	0.962999	-0.0628961		298	-0.503107	0.659292		298	0.182528	0.422159
	299	1.16181	-0.40087		299	-0.613555	-0.113851		299	0.182528	0.104066
	300	0.962999	-0.758725		300	-0.447882	-0.679902		300	-0.0295343	-0.320058
	301	0.565383	-0.679202		301	-0.157954	-1.08028		301	-0.241596	-0.426089
	302	-0.0310419	-0.202062		302	0.297648	-1.1217		302	-0.347627	-0.373074
	303	-0.746752	0.0166272		303	0.449516	-0.942218		303	-0.32112	-0.00196515
	304	-1.14437	0.036508		304	0.490934	-0.320943		304	-0.0560421	0.28962
	305	-1.06484	0.294959		305	0.463322	0.438394		305	0.262051	0.157081
	306	-0.627467	0.692575		306	0.352873	1.07348		306	0.288559	0.0245426
	307	-0.209969	0.57329		307	-0.0475047	1.22534		307	0.288559	-0.0549807
	308	0.446098	0.195555		308	-0.406464	1.17012		308	0.15602	0.0775581
	309	1.10217	0.0563888		309	-0.599749	0.783547		309	0.0234812	0.130574
	310	1.42026	-0.0231345		310	-0.530719	0.176078		310	-0.188581	0.130574
	311	1.10217	-0.380989		311	-0.434076	-0.431392		311	-0.188581	-0.0814884
	312	0.525621	-0.599678		312	-0.144147	-0.900799		312	0.0499889	-0.29355
	313	-0.0906844	-0.380989		313	0.25623	-1.02505		313	-0.0295343	-0.214027
	314	-0.687109	-0.202062		314	0.587577	-1.02505		314	0.0234812	-0.134504
	315	-1.10461	-0.241824		315	0.670413	-0.459004		315	-0.109058	-0.00196515
	316	-1.10461	-0.102658		316	0.615189	0.0932409		316	-0.32112	0.104066
	317	-0.687109	0.414244		317	0.50474	0.590261		317	-0.0825499	-0.0814884
	318	-0.130446	0.632933		318	0.0905565	0.728322		318	0.288559	-0.0284729
	319	0.446098	0.513648		319	-0.296015	0.755935		319	0.368082	0.130574
	320	0.962999	0.434125		320	-0.710198	0.562649		320	0.500621	0.157081
	321	1.20157	0.473886		321	-0.682586	0.0932409		321	0.235543	0.236605
	322	1.02264	0.215435		322	-0.73781	-0.307136		322	-0.268104	0.0245426
	323	0.386455	-0.341228		323	-0.434076	-0.610871		323	-0.347627	-0.161012
	324	-0.209969	-0.579798		324	-0.102729	-0.707514		324	-0.32112	-0.214027
	325	-0.70699	-0.599678		325	0.532352	-0.735126		325	-0.109058	-0.214027
	326	-1.12449	-0.579798		326	0.75325	-0.389973		326	0.129512	-0.107996
	327	-1.24377	-0.460513		327	0.808475	0.0242103		327	0.0499889	-0.00196515
	328	-0.846156	0.0961505		328	0.601383	0.466006		328	0.0499889	0.0510504
	329	-0.0111611	0.672694		329	0.242424	0.645486		329	-0.00302659	0.104066
	330	0.545502	0.81186		330	-0.282209	0.88019		330	0.0764967	0.28962
	331	0.784072	0.712456		331	-0.806841	0.838771		331	0.341574	0.316128
	332	0.98288	0.613052		332	-0.903484	0.521231		332	0.368082	0.130574
	333	0.943119	0.275078		333	-0.779229	0.0656287		333	0.0234812	-0.214027
	334	0.366575	-0.500274		334	-0.461688	-0.29333		334	-0.268104	-0.240535
	335	-0.269612	-0.997295		335	0.0767504	-0.514228		335	-0.559689	-0.214027
	336	-0.627467	-0.937652		336	0.670413	-0.817963		336	-0.480166	-0.0284729
	337	-0.806394	-0.659321		337	0.974148	-0.790351		337	-0.109058	-0.0284729
	338	-1.0052	-0.480393		338	0.780862	-0.47281		338	0.0499889	-0.107996
	339	-0.70699	-0.0231345		339	0.50474	0.0242103		339	0.209035	-0.214027
	340	0.0286006	0.732337		340	0.118169	0.300333		340	0.341574	-0.0549807
	341	0.406336	1.22936		341	-0.337433	0.617873		341	0.235543	0.28962
	342	0.386455	1.11007		342	-0.820647	0.783547		342	0.129512	0.369143
	343	0.465979	0.831741		343	-0.903484	0.783547		343	-0.00302659	0.316128
	344	0.605145	0.414244		344	-0.73781	0.355557		344	-0.162073	0.157081
	345	0.26717	-0.261704		345	-0.392658	0.0242103		345	-0.162073	-0.187519
	346	-0.289493	-1.01718		346	0.0767504	-0.389973		346	-0.215089	-0.267043
	347	-0.488301	-1.27563		347	0.615189	-0.693708		347	-0.215089	-0.187519
	348	-0.46842	-1.07682		348	0.891311	-0.942218		348	-0.215089	-0.134504
	349	-0.667228	-0.758725		349	0.836087	-0.693708		349	-0.188581	0.0775581
	350	-0.627467	-0.221943		350	0.532352	-0.182881		350	0.0234812	0.157081
	351	-0.309373	0.632933		351	0.201005	0.327945		351	0.368082	-0.00196515
	352	0.0484814	1.32876		352	-0.213178	0.659292		352	0.341574	-0.00196515
	353	0.0286006	1.1896		353	-0.558331	0.907802		353	0.15602	0.183589
	354	0.207528	0.791979		354	-0.682586	0.963026		354	-0.00302659	0.28962
	355	0.565383	0.294959		355	-0.585943	0.686904		355	-0.241596	0.369143
	356	0.704549	-0.281585		356	-0.282209	0.189884		356	-0.32112	0.210097
	357	0.48586	-1.03706		357	-0.0198924	-0.348555		357	-0.109058	-0.267043
	358	0.26717	-1.27563		358	0.366679	-0.735126		358	-0.109058	-0.452597
	359	0.147886	-0.917772		359	0.559964	-1.1217		359	-0.109058	-0.320058
	360	-0.150327	-0.480393		360	0.642801	-0.983636		360	-0.0560421	-0.134504
	361	-0.547943	0.0762697		361	0.421903	-0.528034		361	0.129512	0.0775581
	362	-0.667228	0.851622		362	0.228618	0.189884		362	0.262051	0.316128
	363	-0.508182	1.40828		363	-0.102729	0.590261		363	0.15602	0.236605
	364	-0.22985	1.22936		364	-0.42027	1.04586		364	0.103004	0.183589
	365	0.0683622	0.632933		365	-0.627362	1.33579		365	0.0499889	0.104066
	366	0.446098	0.135912		366	-0.4893	1.18392		366	0.0499889	0.0775581
	367	0.74431	-0.380989		367	-0.323627	0.479812		367	-0.00302659	0.0775581
	368	0.724429	-0.87801		368	-0.0751169	-0.29333		368	-0.162073	-0.161012
	369	0.48586	-1.05694		369	0.201005	-0.873187		369	-0.188581	-0.187519
	370	0.167766	-0.778606		370	0.601383	-1.24595		370	-0.162073	-0.161012
	371	-0.190088	-0.301466		371	0.739444	-1.28737		371	-0.0295343	-0.161012
	372	-0.627467	0.036508		372	0.68422	-0.748932		372	0.15602	-0.0284729
	373	-0.925679	0.414244		373	0.449516	-0.0724325		373	0.262051	0.0775581
	374	-0.786513	0.692575		374	0.173393	0.645486		374	0.129512	0.130574
	375	-0.448539	0.752218		375	-0.213178	1.07348		375	0.0234812	0.263112
	376	-0.0310419	0.454005		376	-0.461688	1.37721		376	0.0499889	0.210097
	377	0.346694	0.036508		377	-0.530719	0.935414		377	-0.0295343	0.0775581
	378	0.863595	-0.221943		378	-0.42027	0.314139		378	-0.109058	-0.240535
	379	1.04252	-0.460513		379	-0.296015	-0.555647		379	-0.0560421	-0.346566
	380	0.764191	-0.659321		380	-0.0613108	-1.01125		380	-0.135565	-0.187519
	381	0.306932	-0.619559		381	0.228618	-1.45304		381	-0.162073	-0.107996
	382	-0.0509227	-0.221943		382	0.421903	-1.21834		382	-0.0295343	0.104066
	383	-0.508182	0.0961505		383	0.435709	-0.693708		383	-0.0295343	0.0245426
	384	-1.02508	0.255197		384	0.366679	0.20369		384	-0.00302659	-0.107996
	385	-1.04496	0.454005		385	0.32526	0.811159		385	-0.0560421	-0.00196515
	386	-0.587705	0.672694		386	0.159587	1.3496		386	0.0234812	0.157081
	387	-0.130446	0.613052		387	-0.116535	1.3634		387	0.288559	0.157081
	388	0.26717	0.255197		388	-0.323627	1.08728		388	0.235543	0.210097
	389	0.923238	0.0563888		389	-0.434076	0.383169		389	0.0499889	0.0245426
	390	1.3805	-0.182181		390	-0.42027	-0.2243		390	-0.0560421	-0.161012
	391	1.04252	-0.480393		391	-0.351239	-0.831769		391	-0.215089	-0.161012
	392	0.326813	-0.599678		392	0.0629443	-1.10789		392	-0.268104	-0.187519
	393	-0.269612	-0.440632		393	0.449516	-1.1217		393	-0.135565	-0.161012
	394	-0.786513	-0.321347		394	0.698026	-0.707514		394	-0.0825499	-0.161012
	395	-1.40282	-0.361108		395	0.670413	-0.141463		395	-0.0825499	-0.0549807
	396	-1.46246	-0.1623		396	0.642801	0.479812		396	-0.135565	0.0775581
	397	-0.766632	0.235316		397	0.421903	0.783547		397	0.0764967	0.183589
	398	-0.0111611	0.434125		398	-0.0475047	0.935414		398	0.182528	0.210097
	399	0.565383	0.33472		399	-0.530719	0.659292		399	0.182528	0.210097
	400	1.08228	0.294959		400	-0.779229	0.410782		400	0.235543	0.0510504
	401	1.49978	0.294959		401	-0.710198	-0.196688		401	-0.0295343	-0.00196515
	402	1.10217	0.116031		402	-0.585943	-0.555647		402	-0.374135	-0.134504
	403	0.227409	-0.202062		403	-0.226984	-0.96983		403	-0.400643	-0.187519
	404	-0.488301	-0.40087		404	0.214812	-0.859381		404	-0.374135	-0.0814884
	405	-0.866037	-0.420751		405	0.642801	-0.72132		405	-0.188581	-0.107996
	406	-1.16425	-0.420751		406	0.780862	-0.169075		406	0.0499889	-0.161012
	407	-1.24377	-0.202062		407	0.698026	0.327945		407	0.182528	0.104066
	408	-0.70699	0.175674		408	0.380485	0.811159		408	0.0764967	0.157081
	409	0.128005	0.613052		409	0.0215259	0.921608		409	0.0764967	0.28962
	410	0.664787	0.752218		410	-0.4893	0.907802		410	0.0234812	0.316128
	411	0.863595	0.692575		411	-0.66878	0.645486		411	0.0234812	-0.0284729
	412	0.943119	0.473886		412	-0.710198	0.189884		412	0.103004	-0.187519
	413	0.823834	0.0762697		413	-0.406464	-0.403779		413	0.0234812	-0.0549807
	414	0.227409	-0.440632		414	-0.144147	-0.679902		414	-0.162073	0.0510504
	415	-0.448539	-0.917772		415	0.366679	-0.748932		415	-0.188581	-0.00196515
	416	-0.726871	-0.997295		416	0.767056	-0.707514		416	-0.268104	-0.134504
	417	-0.667228	-0.798487		417	0.960342	-0.54184		417	-0.268104	-0.161012
	418	-0.726871	-0.420751		418	0.75325	-0.0586264		418	-0.00302659	-0.0814884
	419	-0.547943	0.036508		419	0.435709	0.355557		419	0.235543	0.104066
	420	0.0286006	0.712456		420	-0.00608631	0.576455		420	0.527128	0.369143
	421	0.50574	1.30888		421	-0.434076	0.617873		421	0.421097	0.263112
	422	0.605145	1.24924		422	-0.779229	0.604067		422	-0.00302659	0.130574
	423	0.565383	0.692575		423	-0.751617	0.300333		423	-0.268104	0.0510504
	424	0.724429	0.255197		424	-0.654974	-0.100045		424	-0.268104	-0.0814884
	425	0.446098	-0.202062		425	-0.268403	-0.376167		425	-0.0560421	-0.187519
	426	-0.170208	-0.838248		426	0.187199	-0.514228		426	-0.0825499	-0.346566
	427	-0.508182	-1.29551		427	0.711832	-0.693708		427	-0.268104	-0.214027
	428	-0.528063	-0.818367		428	0.891311	-0.610871		428	-0.241596	-0.0284729
	429	-0.607586	-0.122539		429	0.836087	-0.265718		429	-0.0825499	-0.0284729
	430	-0.726871	0.175674		430	0.573771	0.162271		430	0.103004	0.263112
	431	-0.408778	0.553409		431	0.104363	0.383169		431	0.553636	-0.0284729
	432	0.227409	1.22936		432	-0.475494	0.714516		432	0.447605	-0.00196515
	433	0.366575	1.36852		433	-0.806841	0.811159		433	0.103004	0.236605
	434	0.406336	0.593171		434	-0.806841	0.659292		434	-0.188581	0.210097
	435	0.50574	-0.102658		435	-0.585943	0.217496		435	-0.427151	0.157081
	436	0.644906	-0.341228		436	-0.226984	-0.113851		436	-0.162073	-0.134504
	437	0.346694	-0.798487		437	0.283842	-0.54184		437	0.0499889	-0.452597
	438	0.0882431	-1.29551		438	0.767056	-0.928412		438	0.0499889	-0.452597
	439	0.0286006	-1.01718		439	0.836087	-1.10789		439	-0.109058	-0.346566
	440	-0.0906844	-0.102658		440	0.628995	-0.804157		440	-0.32112	-0.107996
	441	-0.508182	0.354601		441	0.339067	-0.389973		441	-0.109058	0.28962
	442	-0.647347	0.692575		442	0.0767504	0.20369		442	0.262051	0.263112
	443	-0.448539	1.1896		443	-0.337433	0.686904		443	0.527128	0.157081
	444	-0.150327	1.40828		444	-0.66878	1.08728		444	0.474113	0.104066
	445	-0.0509227	0.632933		445	-0.66878	0.976832		445	-0.0825499	0.0510504
	446	0.207528	-0.221943		446	-0.378851	0.673098		446	-0.480166	-0.161012
	447	0.50574	-0.440632		447	-0.130341	0.0932409		447	-0.453658	0.0245426
	448	0.48586	-0.699083		448	0.173393	-0.47281		448	-0.162073	-0.0549807
	449	0.24729	-1.23586		449	0.463322	-1.01125		449	0.129512	-0.161012
	450	-0.0310419	-1.0967		450	0.739444	-1.14931		450	0.182528	-0.0549807
	451	-0.309373	-0.102658		451	0.601383	-0.859381		451	-0.00302659	-0.187519
	452	-0.726871	0.533529		452	0.50474	-0.29333		452	-0.374135	-0.0284729
	453	-1.06484	0.593171		453	0.242424	0.341751		453	-0.268104	0.236605
	454	-0.94556	0.772099		454	0.0767504	0.921608		454	0.209035	0.263112
	455	-0.448539	1.24924		455	-0.296015	1.21154		455	0.421097	0.422159
	456	0.0882431	0.791979		456	-0.351239	1.17012		456	0.39459	0.210097
	457	0.50574	-0.0827769		457	-0.392658	0.604067		457	-0.00302659	-0.0814884
	458	0.823834	-0.341228		458	-0.268403	-0.00340191		458	-0.374135	-0.107996
	459	1.00276	-0.221943		459	-0.24079	-0.804157		459	-0.480166	-0.267043
	460	0.803953	-0.559917		460	0.0215259	-1.24595		460	-0.374135	-0.320058
	461	0.26717	-0.778606		461	0.228618	-1.50827		461	-0.00302659	-0.161012
	462	-0.249731	-0.122539		462	0.421903	-1.09409		462	0.262051	-0.161012
	463	-0.667228	0.533529		463	0.394291	-0.431392		463	0.15602	-0.0549807
	464	-0.965441	0.414244		464	0.311454	0.424588		464	0.0499889	0.157081
	465	-1.04496	0.33472		465	0.159587	0.990638		465	-0.188581	0.316128
	466	-0.687109	0.772099		466	-0.088923	1.41863		466	-0.135565	0.422159
	467	-0.170208	0.752218		467	-0.378851	1.32199		467	0.129512	0.157081
	468	0.287051	0.0166272		468	-0.4893	0.88019		468	0.209035	-0.0814884
	469	0.784072	-0.321347		469	-0.42027	0.0518226		469	0.103004	-0.240535
	470	1.14193	-0.202062		470	-0.282209	-0.514228		470	0.0764967	-0.187519
	471	0.883476	-0.480393		471	-0.144147	-0.900799		471	-0.241596	-0.0549807
	472	0.227409	-0.937652		472	0.242424	-1.03886		472	-0.453658	0.210097
	473	-0.46842	-0.559917		473	0.628995	-0.928412		473	-0.294612	0.210097
	474	-0.905798	0.135912		474	0.739444	-0.389973		474	-0.0295343	-0.0284729
	475	-1.40282	0.155793		475	0.628995	0.27272		475	0.262051	-0.134504
	476	-1.4227	0.0563888		476	0.490934	0.755935		476	0.606652	-0.107996
	477	-0.826275	0.57329		477	0.228618	0.990638		477	0.39459	-0.0814884
	478	0.00871976	0.951026		478	-0.282209	1.04586		478	-0.0560421	0.52819
	479	0.625025	0.454005		479	-0.654974	0.686904		479	-0.374135	0.395651
	480	1.12205	-0.00325364		480	-0.710198	0.0380164		480	-0.32112	-0.0549807
	481	1.44014	0.155793		481	-0.558331	-0.583259		481	-0.00302659	-0.240535
	482	1.10217	0.116031		482	-0.406464	-0.942218		482	0.341574	-0.399581
	483	0.207528	-0.440632		483	-0.0198924	-1.20453		483	0.15602	-0.320058
	484	-0.528063	-0.540036		484	0.380485	-1.06647		484	-0.215089	0.0775581
	485	-0.925679	-0.0430153		485	0.711832	-0.528034		485	-0.374135	0.104066
	486	-1.22389	0.0961505		486	0.670413	0.217496		486	-0.400643	-0.0549807
	487	-1.22389	-0.122539		487	0.628995	0.631679		487	-0.00302659	-0.0284729
	488	-0.567824	0.235316		488	0.297648	0.990638		488	0.527128	-0.0549807
	489	0.306932	0.851622		489	-0.088923	1.04586		489	0.606652	0.183589
	490	0.803953	0.732337		490	-0.572137	0.852577		490	0.39459	0.448667
	491	0.943119	0.33472		491	-0.696392	0.20369		491	-0.0825499	0.157081
	492	1.0624	0.394363		492	-0.627362	-0.29333		492	-0.559689	-0.0814884
	493	0.764191	0.215435		493	-0.337433	-0.735126		493	-0.453658	-0.399581
	494	0.00871976	-0.699083		494	0.0491382	-1.02505		494	-0.0560421	-0.479105
	495	-0.627467	-1.35515		495	0.532352	-0.928412		495	0.0764967	-0.214027
	496	-0.885917	-0.897891		496	0.849893	-0.569453		496	0.103004	0.0245426
	497	-0.965441	-0.540036		497	0.891311	-0.0448203		497	-0.0825499	0.157081
	498	-0.965441	-0.559917		498	0.711832	0.20369		498	-0.241596	0.210097
	499	-0.528063	-0.1623		499	0.339067	0.562649		499	0.103004	-0.00196515
	500	0.128005	0.970907		500	-0.116535	0.645486		500	0.368082	-0.0814884
	501	0.446098	1.42817		501	-0.627362	0.617873		501	0.288559	0.0245426
	502	0.48586	0.990788		502	-0.834453	0.217496		502	0.0499889	0.0245426
	503	0.585264	0.652814		503	-0.820647	-0.0586264		503	-0.188581	0.104066
	504	0.545502	0.473886		504	-0.572137	-0.459004		504	-0.427151	0.0510504
	505	0.0882431	-0.301466		505	-0.17176	-0.610871		505	-0.347627	-0.240535
	506	-0.408778	-1.31539		506	0.463322	-0.679902		506	-0.215089	-0.240535
	507	-0.607586	-1.25575		507	0.946536	-0.500422		507	-0.268104	-0.29355
	508	-0.587705	-0.540036		508	1.07079	-0.279524		508	-0.0825499	-0.134504
	509	-0.726871	-0.241824		509	0.836087	0.0794348		509	0.209035	0.0510504
	510	-0.647347	0.0166272		510	0.408097	0.466006		510	0.341574	0.28962
	511	-0.309373	0.891384		511	-0.102729	0.714516		511	0.341574	0.316128
	512	0.00871976	1.62697		512	-0.613555	0.824965		512	0.0499889	0.130574
	513	0.128005	1.03055		513	-0.806841	0.686904		513	-0.215089	-0.0284729
	514	0.287051	0.195555		514	-0.696392	0.493618		514	-0.268104	-0.161012
	515	0.48586	-0.122539		515	-0.406464	-0.017208		515	-0.188581	-0.107996
	516	0.426217	-0.40087		516	0.0215259	-0.403779		516	-0.0825499	-0.0549807
	517	0.0683622	-1.1961		517	0.546158	-0.886993		517	-0.109058	-0.214027
	518	-0.110565	-1.33527		518	0.905117	-0.983636		518	-0.268104	-0.240535
	519	-0.110565	-0.599678		519	0.918924	-0.914606		519	-0.268104	-0.134504
	520	-0.249731	-0.102658		520	0.559964	-0.431392		520	0.15602	-0.0814884
	521	-0.46842	0.036508		521	0.242424	0.120853		521	0.368082	0.0775581
	522	-0.448539	0.652814		522	-0.157954	0.631679		522	0.288559	0.183589
	523	-0.130446	1.54745		523	-0.503107	0.976832		523	0.129512	0.210097
	524	0.0286006	1.26912		524	-0.806841	0.94922		524	-0.0825499	0.342636
	525	0.147886	0.294959		525	-0.66878	0.70071		525	-0.162073	0.263112
	526	0.426217	-0.122539		526	-0.365045	0.217496		526	-0.109058	0.0245426
	527	0.565383	-0.241824		527	-0.130341	-0.169075		527	-0.0295343	-0.29355
	528	0.366575	-0.838248		528	0.173393	-0.776544		528	-0.215089	-0.558628
	529	0.147886	-1.29551		529	0.546158	-1.1217		529	-0.32112	-0.373074
	530	0.108124	-0.619559		530	0.794668	-1.05267		530	-0.294612	0.0245426
	531	-0.209969	0.135912		531	0.573771	-0.417585		531	-0.0825499	0.501682
	532	-0.746752	0.294959		532	0.352873	0.162271		532	0.39459	0.422159
	533	-0.94556	0.533529		533	0.214812	0.617873		533	0.580144	0.0245426
	534	-0.687109	1.26912		534	-0.0198924	1.08728		534	0.39459	-0.187519
	535	-0.369016	1.26912		535	-0.42027	1.25295		535	-0.00302659	-0.0284729
	536	-0.0906844	0.354601		536	-0.530719	0.866383		536	-0.294612	0.104066
	537	0.545502	-0.221943		537	-0.365045	0.134659		537	-0.374135	0.28962
	538	1.04252	-0.202062		538	-0.185566	-0.431392		538	-0.294612	0.0510504
	539	1.0624	-0.659321		539	-0.088923	-0.983636		539	0.103004	-0.187519
	540	0.74431	-1.1961		540	0.214812	-1.43924		540	0.15602	-0.426089
	541	0.386455	-0.838248		541	0.559964	-1.3564		541	0.129512	-0.320058
	542	-0.170208	0.175674		542	0.68422	-0.790351		542	0.0764967	-0.0549807
	543	-0.846156	0.33472		543	0.435709	-0.113851		543	-0.0560421	0.157081
	544	-1.14437	0.394363		544	0.25623	0.369363		544	0.129512	0.422159
	545	-0.826275	0.791979		545	-0.0751169	1.04586		545	0.315066	0.316128
	546	-0.428658	0.970907		546	-0.309821	1.3634		546	0.209035	0.104066
	547	-0.0310419	0.215435		547	-0.66878	1.11489		547	0.0764967	-0.0549807
	548	0.525621	-0.420751		548	-0.585943	0.438394		548	0.0234812	-0.240535
	549	1.12205	-0.241824		549	-0.447882	-0.182881		549	-0.162073	-0.240535
	550	1.20157	-0.301466		550	-0.157954	-0.707514		550	-0.32112	0.0510504
	551	0.74431	-0.738844		551	0.0215259	-1.19073		551	-0.188581	0.0510504
	552	0.108124	-0.63944		552	0.408097	-1.21834		552	-0.135565	-0.161012
	553	-0.448539	0.036508		553	0.628995	-0.748932		553	0.0764967	-0.161012
	554	-1.0052	0.175674		554	0.670413	-0.0310141		554	0.103004	-0.134504
	555	-1.28353	-0.0430153		555	0.408097	0.686904		555	0.129512	0.157081
	556	-1.06484	0.235316		556	0.242424	1.17012		556	0.182528	0.369143
	557	-0.428658	0.81186		557	-0.0336985	1.37721		557	0.0234812	0.422159
	558	0.187647	0.57329		558	-0.309821	1.05967		558	0.0234812	0.157081
	559	0.664787	0.135912		559	-0.558331	0.410782		559	0.235543	-0.187519
	560	1.14193	0.255197		560	-0.530719	-0.445198		560	-0.00302659	-0.399581
	561	1.24133	0.394363		561	-0.392658	-1.06647		561	-0.241596	-0.373074
	562	0.803953	-0.0628961		562	-0.17176	-1.38401		562	-0.32112	-0.107996
	563	-0.0509227	-0.559917		563	0.0905565	-1.32879		563	-0.294612	0.0245426
	564	-0.627467	-0.261704		564	0.421903	-0.900799		564	-0.109058	-0.00196515
	565	-0.965441	-0.0827769		565	0.518546	-0.196688		565	0.15602	-0.0284729
	566	-1.24377	-0.261704		566	0.559964	0.576455		566	0.103004	-0.134504
	567	-1.22389	-0.142419		567	0.380485	0.921608		567	0.368082	0.0245426
	568	-0.587705	0.57329		568	0.159587	1.04586		568	0.288559	0.157081
	569	0.187647	0.831741		569	-0.282209	0.866383		569	0.0234812	0.157081
	570	0.644906	0.473886		570	-0.599749	0.521231		570	-0.0825499	0.236605
	571	0.843714	0.434125		571	-0.751617	-0.155269		571	-0.109058	-0.0284729
	572	1.00276	0.493767		572	-0.654974	-0.666096		572	-0.241596	-0.29355
	573	0.684668	-0.0430153		573	-0.351239	-0.900799		573	-0.0825499	-0.346566
	574	-0.0906844	-0.838248		574	0.159587	-0.873187		574	-0.0295343	-0.29355
	575	-0.70699	-0.87801		575	0.670413	-0.638483		575	-0.109058	-0.0549807
	576	-0.885917	-0.460513		576	0.918924	-0.141463		576	-0.109058	0.130574
	577	-1.02508	-0.440632		577	0.849893	0.424588		577	-0.109058	0.183589
	578	-1.02508	-0.261704		578	0.573771	0.70071		578	0.182528	-0.0284729
	579	-0.488301	0.454005		579	0.118169	0.755935		579	0.288559	-0.0814884
	580	0.326813	1.07031		580	-0.447882	0.728322		580	0.235543	0.104066
	581	0.664787	0.990788		581	-0.834453	0.493618		581	0.182528	0.0775581
	582	0.724429	0.772099		582	-0.862066	0.0932409		582	-0.241596	0.210097
	583	0.803953	0.632933		583	-0.682586	-0.348555		583	-0.347627	0.263112
	584	0.724429	0.0961505		584	-0.42027	-0.47281		584	-0.188581	-0.0814884
	585	0.227409	-0.778606		585	0.0629443	-0.693708		585	-0.268104	-0.426089
	586	-0.349135	-1.13646		586	0.615189	-0.679902		586	-0.188581	-0.505612
	587	-0.627467	-0.818367		587	0.960342	-0.47281		587	-0.0560421	-0.373074
	588	-0.806394	-0.540036		588	0.780862	0.0794348		588	0.0764967	0.130574
	589	-0.826275	-0.241824		589	0.546158	0.369363		589	0.262051	0.475174
	590	-0.46842	0.354601		590	0.0905565	0.659292		590	0.421097	0.422159
	591	-0.0906844	1.07031		591	-0.323627	0.824965		591	0.368082	0.263112
	592	0.128005	1.14983		592	-0.793035	0.866383		592	0.0499889	0.0775581
	593	0.167766	0.772099		593	-0.779229	0.355557		593	-0.188581	-0.214027
	594	0.366575	0.454005		594	-0.585943	-0.00340191		594	-0.268104	-0.161012
	595	0.446098	0.0563888		595	-0.185566	-0.362361		595	-0.294612	-0.187519
	596	0.306932	-0.63944		596	0.214812	-0.569453		596	-0.109058	-0.134504
	597	0.00871976	-1.1961		597	0.68422	-0.886993		597	0.0234812	0.0510504
	598	-0.130446	-1.07682		598	0.918924	-0.762738		598	-0.00302659	-0.0284729
	599	-0.249731	-0.559917		599	0.794668	-0.362361		599	0.129512	0.0245426
	600	-0.408778	-0.182181		600	0.408097	-0.017208		600	0.341574	0.104066
	601	-0.528063	0.394363		601	0.0767504	0.327945		601	0.288559	0.0245426
	602	-0.408778	1.14983		602	-0.309821	0.686904		602	0.235543	0.0510504
	603	-0.0708035	1.46793		603	-0.613555	0.852577		603	0.315066	0.183589
	604	0.147886	1.03055		604	-0.903484	0.631679		604	-0.135565	0.28962
	605	0.346694	0.473886		605	-0.751617	0.258914		605	-0.162073	0.157081
	606	0.525621	0.0563888		606	-0.447882	-0.0724325		606	-0.268104	-0.161012
	607	0.644906	-0.500274		607	-0.0613108	-0.47281		607	-0.268104	-0.399581
	608	0.366575	-1.13646		608	0.25623	-0.886993		608	0.0499889	-0.505612
	609	0.128005	-1.05694		609	0.656607	-0.96983		609	0.15602	-0.240535
	610	-0.110565	-0.520155		610	0.75325	-0.638483		610	0.209035	0.130574
	611	-0.369016	0.036508		611	0.587577	-0.0724325		611	0.209035	0.342636
	612	-0.846156	0.434125		612	0.25623	0.438394		612	0.235543	0.28962
	613	-1.0052	1.01067		613	0.0215259	0.852577		613	0.182528	0.0775581
	614	-0.647347	1.289		614	-0.296015	1.08728		614	0.0499889	-0.0549807
	615	-0.22985	0.871503		615	-0.572137	1.01825		615	0.103004	-0.0549807
	616	0.0484814	0.235316		616	-0.544525	0.576455		616	-0.00302659	-0.0284729
	617	0.465979	-0.1623		617	-0.282209	-0.0862386		617	-0.188581	0.0510504
	618	0.843714	-0.540036		618	-0.00608631	-0.624677		618	-0.215089	-0.161012
	619	0.903357	-0.957533		619	0.25623	-1.08028		619	-0.109058	-0.426089
	620	0.50574	-0.957533		620	0.518546	-1.32879		620	-0.0825499	-0.426089
	621	0.0882431	-0.361108		621	0.642801	-1.19073		621	0.0499889	-0.214027
	622	-0.388897	0.116031		622	0.449516	-0.514228		622	0.129512	0.130574
	623	-0.985322	0.33472		623	0.159587	0.245108		623	0.288559	0.501682
	624	-1.26365	0.672694		624	-0.088923	0.714516		624	0.288559	0.395651
	625	-0.94556	1.01067		625	-0.309821	1.10109		625	0.0499889	0.0775581
	626	-0.408778	0.772099		626	-0.558331	1.18392		626	-0.241596	-0.00196515
	627	0.128005	0.215435		627	-0.558331	0.88019		627	-0.162073	-0.240535
	628	0.684668	-0.0827769		628	-0.475494	0.0242103		628	-0.268104	-0.320058
	629	1.16181	-0.202062		629	-0.226984	-0.597065		629	-0.109058	-0.0284729
	630	1.02264	-0.520155		630	-0.088923	-1.08028		630	-0.00302659	-0.0284729
	631	0.48586	-0.659321		631	0.228618	-1.23215		631	-0.0560421	0.0775581
	632	-0.110565	-0.361108		632	0.449516	-1.1355		632	-0.135565	0.104066
	633	-0.587705	-0.0231345		633	0.546158	-0.376167		633	-0.0825499	-0.267043
	634	-1.08473	0.0166272		634	0.421903	0.369363		634	0.103004	-0.214027
	635	-1.24377	0.135912		635	0.32526	0.976832		635	0.15602	-0.0549807
	636	-0.846156	0.493767		636	0.0905565	1.21154		636	0.262051	0.263112
	637	-0.309373	0.632933		637	-0.144147	1.29437		637	0.15602	0.52819
	638	0.24729	0.394363		638	-0.447882	0.811159		638	-0.135565	0.316128
	639	0.863595	0.215435		639	-0.461688	0.0380164		639	-0.294612	-0.373074
	640	1.24133	0.175674		640	-0.4893	-0.693708		640	-0.162073	-0.53212
	641	1.14193	-0.00325364		641	-0.268403	-1.10789		641	0.0234812	-0.399581
	642	0.48586	-0.301466		642	-0.0751169	-1.3426		642	0.0764967	-0.0549807
	643	-0.130446	-0.440632		643	0.339067	-1.24595		643	-0.109058	0.263112
	644	-0.687109	-0.301466		644	0.435709	-0.555647		644	-0.135565	0.28962
	645	-1.18413	-0.361108		645	0.573771	0.245108		645	-0.0295343	-0.00196515
	646	-1.30341	-0.301466		646	0.463322	0.893996		646	0.0764967	-0.240535
	647	-1.06484	0.116031		647	0.32526	1.10109		647	0.209035	-0.134504
	648	-0.448539	0.632933		648	-0.144147	1.08728		648	0.341574	0.210097
	649	0.227409	0.81186		649	-0.530719	0.70071		649	0.129512	0.581205
	650	0.823834	0.652814		650	-0.820647	0.0656287		650	-0.135565	0.422159
	651	1.14193	0.513648		651	-0.806841	-0.486616		651	-0.347627	-0.214027
	652	1.12205	0.195555		652	-0.599749	-0.886993		652	-0.241596	-0.664659
	653	0.764191	-0.420751		653	-0.116535	-1.06647		653	-0.0560421	-0.558628
	654	0.227409	-0.858129		654	0.380485	-0.928412		654	-0.00302659	-0.161012
	655	-0.448539	-0.87801		655	0.767056	-0.417585		655	-0.109058	0.369143
	656	-0.925679	-0.659321		656	0.905117	0.258914		656	0.0234812	0.581205
	657	-1.06484	-0.380989		657	0.767056	0.673098		657	0.0499889	0.157081
	658	-0.866037	0.0762697		658	0.394291	0.921608		658	0.15602	-0.187519
	659	-0.329254	0.632933		659	-0.144147	0.852577		659	0.235543	-0.107996
	660	0.287051	0.931145		660	-0.627362	0.686904		660	0.235543	-0.00196515
	661	0.863595	0.891384		661	-0.889678	0.231302		661	0.129512	0.316128
	662	1.10217	0.732337		662	-0.848259	-0.2243		662	0.0499889	0.183589
	663	0.98288	0.33472		663	-0.613555	-0.693708		663	-0.533182	-0.214027
	664	0.565383	-0.241824		664	-0.254596	-0.873187		664	-0.559689	-0.558628
	665	-0.0111611	-0.738844		665	0.297648	-0.804157		665	-0.109058	-0.399581
	666	-0.547943	-0.87801		666	0.808475	-0.47281		666	0.209035	0.0245426
	667	-0.965441	-0.778606		667	0.905117	-0.0586264		667	0.500621	0.369143
	668	-1.10461	-0.619559		668	0.68422	0.396975		668	0.580144	0.236605
	669	-0.846156	-0.202062		669	0.32526	0.686904		669	-0.00302659	-0.00196515
	670	-0.388897	0.414244		670	0.035332	0.838771		670	-0.215089	-0.0814884
	671	-0.0509227	0.891384		671	-0.516913	0.742128		671	0.103004	-0.107996
	672	0.187647	1.01067		672	-0.820647	0.521231		672	0.103004	0.157081
	673	0.326813	0.81186		673	-0.793035	0.0104042		673	0.15602	0.395651
	674	0.426217	0.394363		674	-0.475494	-0.376167		674	0.209035	0.104066
	675	0.306932	-0.241824		675	-0.24079	-0.638483		675	-0.241596	-0.267043
	676	0.0683622	-0.917772		676	0.173393	-0.735126		676	-0.453658	-0.452597
	677	-0.0509227	-1.1961		677	0.68422	-0.762738		677	-0.32112	-0.505612
	678	-0.249731	-1.11658		678	0.946536	-0.459004		678	-0.0295343	-0.0549807
	679	-0.369016	-0.738844		679	0.698026	0.0380164		679	0.39459	0.263112
	680	-0.369016	-0.182181		680	0.366679	0.396975		680	0.606652	0.316128
	681	-0.22985	0.613052		681	0.0629443	0.604067		681	0.474113	0.422159
	682	-0.150327	1.22936		682	-0.351239	0.797353		682	0.103004	0.183589
	683	-0.150327	1.32876		683	-0.889678	0.742128		683	-0.294612	-0.0814884
	684	0.0286006	0.990788		684	-1.01393	0.341751		684	-0.427151	-0.161012
	685	0.346694	0.434125		685	-0.710198	-0.0724325		685	-0.135565	-0.320058
	686	0.48586	-0.261704		686	-0.268403	-0.307136		686	-0.00302659	-0.214027
	687	0.386455	-0.917772		687	0.0491382	-0.583259		687	0.0499889	-0.0284729
	688	0.306932	-1.23586		688	0.477128	-0.873187		688	-0.0825499	-0.0549807
	689	0.227409	-1.07682		689	0.822281	-0.666096		689	-0.241596	-0.0549807
	690	-0.110565	-0.718963		690	0.767056	-0.182881		690	-0.188581	-0.187519
	691	-0.528063	-0.0827769		691	0.380485	0.27272		691	0.129512	-0.0549807
	692	-0.766632	0.632933		692	0.035332	0.493618		692	0.527128	0.157081
	693	-0.70699	1.16972		693	-0.254596	0.811159		693	0.553636	0.316128
	694	-0.647347	1.11007		694	-0.544525	0.935414		694	0.103004	0.316128
	695	-0.369016	0.652814		695	-0.696392	0.755935		695	-0.374135	0.0775581
	696	0.128005	0.0961505		696	-0.447882	0.27272		696	-0.612705	-0.161012
	697	0.585264	-0.420751		697	-0.116535	-0.169075		697	-0.639213	-0.452597
	698	0.74431	-0.858129		698	0.145781	-0.776544		698	-0.0295343	-0.426089
	699	0.684668	-1.03706		699	0.352873	-1.14931		699	0.421097	-0.0814884
	700	0.465979	-0.778606		700	0.615189	-1.20453		700	0.341574	0.210097
	701	-0.0310419	-0.261704		701	0.615189	-0.707514		701	0.15602	0.28962
	702	-0.547943	0.235316		702	0.394291	-0.113851		702	-0.0560421	0.183589
	703	-0.905798	0.454005		703	0.0215259	0.507424		703	-0.135565	-0.134504
	704	-0.905798	0.712456		704	-0.144147	1.00444		704	0.0499889	-0.161012
	705	-0.70699	0.791979		705	-0.392658	1.21154		705	0.209035	0.0510504
	706	-0.249731	0.652814		706	-0.516913	1.01825		706	0.182528	0.28962
	707	0.326813	0.235316		707	-0.599749	0.507424		707	-0.0825499	0.369143
	708	0.803953	-0.0628961		708	-0.378851	-0.141463		708	-0.294612	0.0245426
	709	1.08228	-0.361108		709	-0.213178	-0.748932		709	-0.453658	-0.585136
	710	0.98288	-0.63944		710	0.0215259	-1.08028		710	-0.215089	-0.691167
	711	0.565383	-0.699083		711	0.187199	-0.997442		711	0.0764967	-0.399581
	712	-0.0310419	-0.40087		712	0.408097	-0.624677		712	0.368082	0.157081
	713	-0.667228	-0.202062		713	0.394291	-0.017208		713	0.262051	0.501682
	714	-1.16425	-0.0827769		714	0.297648	0.631679		714	0.0499889	0.52819
	715	-1.36306	0.155793		715	0.187199	1.17012		715	-0.0560421	0.183589
	716	-1.08473	0.493767		716	0.035332	1.32199		716	-0.00302659	-0.267043
	717	-0.488301	0.533529		717	-0.268403	1.11489		717	-0.00302659	-0.426089
	718	0.147886	0.394363		718	-0.530719	0.617873		718	0.0499889	-0.00196515
	719	0.764191	0.294959		719	-0.530719	-0.127657		719	-0.0295343	0.157081
	720	1.22145	0.0166272		720	-0.392658	-0.817963		720	-0.188581	-0.0814884
	721	1.22145	-0.40087		721	-0.157954	-1.24595		721	-0.135565	-0.267043
	722	0.664787	-0.599678		722	0.0905565	-1.21834		722	0.0499889	-0.399581
	723	-0.0509227	-0.440632		723	0.421903	-0.886993		723	0.209035	-0.214027
	724	-0.746752	-0.321347		724	0.490934	-0.182881		724	0.129512	0.210097
	725	-1.28353	-0.241824		725	0.449516	0.493618		725	0.103004	0.316128
	726	-1.40282	0.036508		726	0.270036	1.04586		726	0.182528	0.28962
	727	-1.02508	0.493767		727	0.0491382	1.15631		727	0.129512	0.0510504
	728	-0.369016	0.632933		728	-0.337433	1.08728		728	0.103004	-0.240535
	729	0.167766	0.593171		729	-0.544525	0.466006		729	0.0499889	-0.214027
	730	0.704549	0.553409		730	-0.641168	-0.182881		730	-0.241596	-0.0814884
	731	1.04252	0.414244		731	-0.558331	-0.804157		731	-0.188581	-0.00196515
	732	1.00276	0.036508		732	-0.365045	-0.956024		732	-0.215089	0.0245426
	733	0.465979	-0.440632		733	0.035332	-1.09409		733	-0.109058	-0.161012
	734	-0.0906844	-0.579798		734	0.435709	-0.776544		734	0.182528	-0.240535
	735	-0.70699	-0.679202		735	0.670413	-0.0862386		735	0.262051	-0.187519
	736	-1.06484	-0.699083		736	0.725638	0.645486		736	0.235543	-0.0814884
	737	-1.10461	-0.480393		737	0.587577	0.990638		737	0.103004	0.0775581
	738	-0.726871	0.0762697		738	0.201005	1.10109		738	-0.00302659	0.263112
	739	-0.170208	0.553409		739	-0.296015	1.07348		739	0.0234812	0.263112
	740	0.326813	0.692575		740	-0.627362	0.548843		740	0.0764967	-0.00196515
	741	0.803953	0.752218		741	-0.779229	-0.251912		741	-0.00302659	-0.00196515
	742	1.02264	0.732337		742	-0.793035	-0.790351		742	-0.00302659	-0.0284729
	743	0.863595	0.354601		743	-0.627362	-0.928412		743	-0.241596	-0.346566
	744	0.446098	-0.301466		744	-0.144147	-0.928412		744	-0.162073	-0.426089
	745	0.00871976	-0.798487		745	0.394291	-0.748932		745	-0.0825499	-0.452597
	746	-0.448539	-0.957533		746	0.725638	-0.155269		746	-0.0295343	-0.161012
	747	-0.905798	-0.838248		747	0.711832	0.355557		747	0.182528	0.342636
	748	-0.985322	-0.540036		748	0.559964	0.686904		748	0.209035	0.475174
	749	-0.70699	0.215435		749	0.242424	0.783547		749	0.15602	0.263112
	750	-0.269612	0.891384		750	-0.268403	0.94922		750	0.129512	-0.0284729
	751	-0.0310419	1.1896		751	-0.751617	0.631679		751	0.0234812	-0.267043
	752	0.24729	1.12995		752	-0.903484	0.217496		752	-0.0295343	-0.214027
	753	0.446098	0.891384		753	-0.806841	-0.265718		753	-0.135565	-0.0284729
	754	0.48586	0.434125		754	-0.530719	-0.500422		754	-0.268104	-0.0284729
	755	0.306932	-0.380989		755	-0.0751169	-0.776544		755	-0.374135	-0.00196515
	756	0.0882431	-1.01718		756	0.546158	-0.804157		756	-0.32112	-0.187519
	757	-0.150327	-1.03706		757	0.93273	-0.54184		757	0.0499889	-0.214027
	758	-0.388897	-0.858129		758	0.891311	-0.100045		758	0.315066	0.0510504
	759	-0.46842	-0.63944		759	0.642801	0.341751		759	0.447605	0.157081
	760	-0.408778	-0.142419		760	0.242424	0.645486		760	0.421097	0.210097
	761	-0.289493	0.752218		761	-0.24079	0.824965		761	-0.0825499	0.0510504
	762	-0.130446	1.30888		762	-0.751617	0.714516		762	-0.347627	-0.0284729
	763	0.00871976	1.11007		763	-1.00013	0.479812		763	-0.162073	0.0510504
	764	0.187647	0.772099		764	-0.944902	0.0518226		764	0.0764967	0.0510504
	765	0.346694	0.354601		765	-0.696392	-0.334749		765	-0.00302659	-0.0284729
	766	0.465979	-0.321347		766	-0.226984	-0.638483		766	-0.188581	-0.240535
	767	0.426217	-1.0967		767	0.283842	-0.762738		767	-0.241596	-0.346566
	768	0.306932	-1.13646		768	0.642801	-0.693708		768	-0.0560421	-0.346566
	769	0.207528	-0.718963		769	0.698026	-0.403779		769	0.103004	-0.134504
	770	-0.0111611	-0.40087		770	0.490934	0.107047		770	0.39459	0.210097
	771	-0.488301	0.036508		771	0.173393	0.521231		771	0.315066	0.422159
	772	-0.786513	0.831741		772	-0.185566	0.755935		772	0.315066	0.342636
	773	-0.806394	1.34864		773	-0.558331	0.797353		773	0.103004	0.157081
	774	-0.587705	1.01067		774	-0.751617	0.797353		774	-0.347627	-0.107996
	775	-0.349135	0.414244		775	-0.599749	0.479812		775	-0.374135	-0.187519
	776	0.147886	0.036508		776	-0.378851	-0.017208		776	-0.135565	-0.161012
	777	0.625025	-0.380989		777	-0.0198924	-0.486616		777	-0.109058	-0.161012
	778	0.784072	-0.917772		778	0.297648	-0.762738		778	-0.00302659	-0.0814884
	779	0.704549	-1.03706		779	0.725638	-0.928412		779	0.0764967	-0.0814884
	780	0.426217	-0.659321		780	0.68422	-0.873187		780	0.0234812	0.236605
	781	-0.0509227	-0.261704		781	0.449516	-0.389973		781	0.182528	0.0775581
	782	-0.607586	0.116031		782	0.118169	0.231302		782	0.235543	0.183589
	783	-0.885917	0.632933		783	0.00771981	0.645486		783	0.262051	0.210097
	784	-0.726871	1.11007		784	-0.406464	0.907802		784	0.315066	0.28962
	785	-0.448539	1.05043		785	-0.613555	1.00444		785	0.0234812	0.104066
	786	0.00871976	0.593171		786	-0.627362	0.783547		786	-0.294612	-0.187519
	787	0.48586	0.294959		787	-0.365045	0.134659		787	-0.374135	-0.426089
	788	0.863595	0.0166272		788	-0.337433	-0.431392		788	-0.32112	-0.452597
	789	1.02264	-0.460513		789	-0.0751169	-0.914606		789	-0.0825499	-0.0284729
	790	1.02264	-0.858129		790	0.242424	-1.16312		790	0.421097	0.210097
	791	0.605145	-0.679202		791	0.518546	-1.1217		791	0.500621	0.0775581
	792	-0.110565	-0.281585		792	0.380485	-0.445198		792	0.474113	0.0510504
	793	-0.846156	-0.102658		793	0.25623	0.245108		793	0.129512	-0.0549807
	794	-1.14437	0.036508		794	0.159587	0.893996		794	-0.188581	-0.0814884
	795	-1.16425	0.473886		795	-0.0336985	1.23915		795	-0.109058	0.210097
	796	-0.905798	0.732337		796	-0.296015	1.40482		796	0.103004	0.395651
	797	-0.249731	0.473886		797	-0.461688	0.88019		797	0.182528	0.263112
	798	0.48586	0.175674		798	-0.392658	0.148465		798	0.0499889	-0.0549807
	799	1.08228	0.0961505		799	-0.392658	-0.597065		799	-0.294612	-0.479105
	800	1.26121	-0.0827769		800	-0.254596	-1.05267		800	-0.241596	-0.426089
	801	1.26121	-0.460513		801	-0.0475047	-1.3564		801	-0.135565	-0.161012
	802	0.784072	-0.500274		802	0.408097	-1.06647		802	0.235543	0.0510504
	803	-0.0111611	-0.221943		803	0.490934	-0.500422		803	0.421097	0.183589
	804	-0.786513	-0.142419		804	0.490934	0.189884		804	0.262051	0.0775581
	805	-1.20401	-0.1623		805	0.339067	0.686904		805	0.0234812	-0.107996
	806	-1.30341	0.215435		806	0.25623	1.19773		806	-0.135565	-0.00196515
	807	-1.12449	0.732337		807	-0.185566	1.23915		807	-0.0295343	0.28962
	808	-0.488301	0.772099		808	-0.585943	0.783547		808	0.0764967	0.28962
	809	0.366575	0.513648		809	-0.765423	0.0656287		809	-0.0295343	-0.0284729
	810	1.02264	0.533529		810	-0.641168	-0.54184		810	-0.00302659	-0.399581
	811	1.24133	0.414244		811	-0.544525	-1.01125		811	-0.188581	-0.664659
	812	1.10217	-0.122539		812	-0.24079	-1.30118		812	-0.32112	-0.426089
	813	0.585264	-0.619559		813	0.228618	-1.14931		813	-0.0825499	-0.00196515
	814	-0.170208	-0.579798		814	0.587577	-0.514228		814	0.129512	0.448667
	815	-0.846156	-0.500274		815	0.642801	0.27272		815	0.182528	0.634221
	816	-1.10461	-0.540036		816	0.559964	0.907802		816	0.421097	0.0510504
	817	-1.02508	-0.241824		817	0.421903	1.23915		817	0.315066	-0.267043
	818	-0.667228	0.354601		818	-0.00608631	1.19773		818	0.0234812	-0.267043
	819	-0.0906844	0.632933		819	-0.585943	0.783547		819	-0.109058	-0.0549807
	820	0.545502	0.57329		820	-0.889678	0.0932409		820	-0.135565	0.210097
	821	1.00276	0.652814		821	-0.834453	-0.459004		821	-0.188581	0.263112
	822	1.12205	0.593171		822	-0.627362	-0.873187		822	-0.0825499	0.0510504
	823	0.903357	0.0166272		823	-0.378851	-1.01125		823	0.0234812	-0.373074
	824	0.446098	-0.559917		824	0.0629443	-0.96983		824	0.103004	-0.558628
	825	-0.0111611	-0.718963		825	0.546158	-0.514228		825	0.0234812	-0.240535
	826	-0.46842	-0.679202		826	0.739444	0.120853		826	0.103004	0.28962
	827	-0.826275	-0.758725		827	0.628995	0.659292		827	0.0234812	0.448667
	828	-0.925679	-0.420751		828	0.435709	0.935414		828	0.0764967	0.236605
	829	-0.567824	0.31484		829	0.118169	0.976832		829	0.262051	-0.00196515
	830	-0.150327	0.911264		830	-0.42027	0.866383		830	0.0764967	-0.107996
	831	0.128005	1.09019		831	-0.931096	0.396975		831	-0.0295343	-0.00196515
	832	0.326813	1.09019		832	-0.931096	-0.155269		832	-0.135565	0.104066
	833	0.545502	0.851622		833	-0.641168	-0.652289		833	-0.453658	-0.0814884
	834	0.545502	0.195555		834	-0.337433	-0.817963		834	-0.188581	-0.187519
	835	0.287051	-0.559917		835	0.0905565	-0.886993		835	0.0764967	-0.320058
	836	0.108124	-0.957533		836	0.642801	-0.652289		836	0.129512	-0.320058
	837	-0.110565	-0.957533		837	0.987954	-0.182881		837	0.129512	-0.0549807
	838	-0.369016	-0.818367		838	0.780862	0.341751		838	0.0234812	0.263112
	839	-0.508182	-0.480393		839	0.449516	0.576455		839	0.15602	0.316128
	840	-0.388897	0.195555		840	0.0905565	0.631679		840	0.288559	0.316128
	841	-0.209969	0.911264		841	-0.365045	0.742128		841	0.262051	0.210097
	842	-0.150327	1.22936		842	-0.848259	0.507424		842	0.103004	-0.0814884
	843	0.0882431	0.970907		843	-0.972514	0.0794348		843	-0.0825499	-0.214027
	844	0.346694	0.553409		844	-0.779229	-0.486616		844	-0.241596	-0.320058
	845	0.565383	0.0166272		845	-0.434076	-0.624677		845	-0.32112	-0.240535
	846	0.50574	-0.63944		846	-0.0751169	-0.790351		846	-0.294612	0.0510504
	847	0.426217	-1.13646		847	0.394291	-0.790351		847	0.0499889	0.0775581
	848	0.227409	-1.11658		848	0.615189	-0.528034		848	0.288559	0.104066
	849	0.00871976	-0.699083		849	0.559964	0.0242103		849	0.39459	0.0510504
	850	-0.150327	-0.261704		850	0.242424	0.466006		850	0.421097	-0.107996
	851	-0.428658	0.294959		851	-0.0336985	0.714516		851	0.262051	0.130574
	852	-0.567824	0.970907		852	-0.351239	0.783547		852	0.0499889	0.395651
	853	-0.587705	1.24924		853	-0.613555	0.714516		853	-0.241596	0.210097
	854	-0.369016	0.951026		854	-0.820647	0.327945		854	-0.241596	0.0245426
	855	-0.0509227	0.473886		855	-0.654974	0.0104042		855	-0.0825499	-0.267043
	856	0.227409	0.116031		856	-0.337433	-0.320943		856	-0.0560421	-0.373074
	857	0.545502	-0.460513		857	0.118169	-0.54184		857	0.0764967	-0.320058
	858	0.644906	-1.03706		858	0.366679	-0.776544		858	0.0234812	-0.00196515
	859	0.625025	-1.1961		859	0.601383	-0.72132		859	-0.0825499	0.236605
	860	0.386455	-0.798487		860	0.587577	-0.486616		860	0.129512	0.183589
	861	-0.0509227	-0.380989		861	0.463322	-0.0862386		861	0.288559	-0.107996
	862	-0.607586	0.116031		862	0.0905565	0.341751		862	0.341574	-0.107996
	863	-0.905798	0.692575		863	-0.282209	0.645486		863	0.341574	0.183589
	864	-0.786513	1.14983		864	-0.558331	0.797353		864	-0.0295343	0.369143
	865	-0.408778	0.990788		865	-0.793035	0.728322		865	-0.188581	0.342636
	866	-0.0509227	0.632933		866	-0.710198	0.493618		866	-0.32112	-0.0549807
	867	0.406336	0.215435		867	-0.599749	-0.0862386		867	-0.347627	-0.53212
	868	0.803953	-0.182181		868	-0.199372	-0.624677		868	-0.109058	-0.77069
	869	1.02264	-0.679202		869	0.0491382	-1.06647		869	0.182528	-0.373074
	870	0.823834	-0.87801		870	0.283842	-0.983636		870	0.209035	0.263112
	871	0.465979	-0.63944		871	0.32526	-0.735126		871	0.182528	0.475174
	872	-0.110565	-0.281585		872	0.380485	-0.0586264		872	0.182528	0.369143
	873	-0.806394	-0.00325364		873	0.228618	0.4522		873	0.0234812	-0.00196515
	874	-1.26365	0.275078		874	-0.0475047	1.01825		874	0.0764967	-0.187519
	875	-1.22389	0.57329		875	-0.378851	1.19773		875	0.15602	-0.00196515
	876	-0.846156	0.57329		876	-0.516913	1.18392		876	-0.0560421	0.210097
	877	-0.349135	0.434125		877	-0.544525	0.562649		877	-0.135565	0.157081
	878	0.306932	0.155793		878	-0.475494	-0.127657		878	-0.374135	-0.107996
	879	1.02264	-0.0827769		879	-0.337433	-0.776544		879	-0.374135	-0.426089
	880	1.28109	-0.40087		880	-0.0751169	-1.1355		880	0.0234812	-0.426089
	881	0.962999	-0.500274		881	0.228618	-1.28737		881	0.341574	-0.240535
	882	0.406336	-0.321347		882	0.435709	-0.886993		882	0.341574	0.0510504
	883	-0.22985	-0.202062		883	0.477128	-0.100045		883	0.235543	0.369143
	884	-0.905798	-0.102658		884	0.366679	0.562649		884	-0.00302659	0.448667
	885	-1.34318	0.0166272		885	0.159587	0.990638		885	-0.0295343	0.263112
	886	-1.3233	0.374482		886	-0.088923	1.18392		886	-0.00302659	-0.00196515
	887	-0.866037	0.533529		887	-0.406464	1.14251		887	0.0234812	-0.214027
	888	-0.289493	0.593171		888	-0.599749	0.438394		888	-0.0295343	-0.29355
	889	0.346694	0.473886		889	-0.627362	-0.362361		889	-0.268104	-0.0549807
	890	0.923238	0.394363		890	-0.599749	-0.900799		890	-0.347627	0.130574
	891	1.16181	0.155793		891	-0.447882	-1.05267		891	-0.188581	-0.00196515
	892	0.903357	-0.182181		892	-0.144147	-1.14931		892	0.0764967	-0.134504
	893	0.287051	-0.440632		893	0.270036	-0.804157		893	0.209035	-0.267043
	894	-0.388897	-0.559917		894	0.463322	-0.113851		894	0.315066	-0.214027
	895	-0.846156	-0.619559		895	0.532352	0.631679		895	0.209035	0.236605
	896	-1.18413	-0.520155		896	0.477128	0.935414		896	0.0234812	0.422159
	897	-1.22389	-0.142419		897	0.297648	1.14251		897	-0.0825499	0.316128
	898	-0.826275	0.31484		898	-0.144147	1.1287		898	-0.109058	0.236605
	899	-0.0310419	0.593171		899	-0.599749	0.659292		899	0.103004	-0.161012
	900	0.625025	0.692575		900	-0.793035	-0.155269		900	0.182528	-0.426089
	901	0.943119	0.791979		901	-0.806841	-0.776544		901	-0.0825499	-0.161012
	902	1.0624	0.613052		902	-0.585943	-1.01125		902	-0.268104	-0.0549807
	903	0.923238	0.0166272		903	-0.254596	-1.16312		903	-0.294612	-0.0284729
	904	0.366575	-0.500274		904	0.25623	-0.997442		904	-0.0560421	-0.00196515
	905	-0.209969	-0.738844		905	0.601383	-0.362361		905	0.182528	-0.0549807
	906	-0.528063	-0.699083		906	0.739444	0.424588		906	0.209035	0.0775581
	907	-0.687109	-0.540036		907	0.601383	0.88019		907	0.315066	0.263112
	908	-0.885917	-0.0827769		908	0.270036	1.03206		908	0.368082	0.316128
	909	-0.567824	0.513648		909	-0.199372	0.990638		909	-0.00302659	0.210097
	910	0.0882431	0.851622		910	-0.66878	0.576455		910	-0.188581	-0.0284729
	911	0.386455	1.05043		911	-0.958708	-0.017208		911	-0.215089	-0.346566
	912	0.326813	1.03055		912	-0.931096	-0.54184		912	-0.215089	-0.373074
	913	0.366575	0.712456		913	-0.724004	-0.873187		913	-0.188581	-0.161012
	914	0.545502	-0.00325364		914	-0.268403	-0.956024		914	0.129512	0.210097
	915	0.187647	-0.659321		915	0.173393	-0.790351		915	0.262051	0.183589
	916	-0.289493	-0.977414		916	0.68422	-0.251912		916	0.0499889	-0.161012
	917	-0.349135	-1.07682		917	0.822281	0.189884		917	-0.109058	-0.267043
	918	-0.428658	-0.858129		918	0.836087	0.645486		918	-0.109058	-0.134504
	919	-0.726871	-0.261704		919	0.449516	0.838771		919	0.0764967	0.183589
	920	-0.70699	0.434125		920	-0.00608631	0.783547		920	0.39459	0.501682
	921	-0.190088	0.951026		921	-0.572137	0.424588		921	0.341574	0.342636
	922	0.108124	1.1896		922	-0.820647	0.0518226		922	0.0499889	0.0245426
	923	0.0286006	1.14983		923	-0.903484	-0.348555		923	-0.347627	-0.29355
	924	0.26717	0.692575		924	-0.779229	-0.707514		924	-0.718736	-0.53212
	925	0.74431	-0.0430153		925	-0.42027	-0.886993		925	-0.347627	-0.267043
	926	0.625025	-0.659321		926	0.173393	-0.735126		926	0.209035	0.0245426
	927	0.147886	-0.957533		927	0.642801	-0.528034		927	0.553636	0.0510504
	928	0.00871976	-1.01718		928	0.68422	-0.210494		928	0.553636	0.0775581
	929	0.0683622	-0.738844		929	0.573771	0.217496		929	0.0764967	-0.00196515
	930	-0.269612	-0.182181		930	0.297648	0.604067		930	-0.241596	0.0245426
	931	-0.70699	0.533529		931	-0.17176	0.797353		931	-0.241596	0.130574
	932	-0.607586	1.03055		932	-0.654974	0.70071		932	-0.109058	0.0510504
	933	-0.329254	1.1896		933	-0.889678	0.548843		933	0.235543	0.157081
	934	-0.249731	0.990788		934	-0.779229	0.176078		934	0.15602	-0.107996
	935	-0.0310419	0.513648		935	-0.558331	-0.155269		935	-0.241596	-0.29355
	936	0.426217	-0.0430153		936	-0.17176	-0.459004		936	-0.427151	-0.240535
	937	0.704549	-0.63944		937	0.339067	-0.693708		937	-0.533182	-0.214027
	938	0.565383	-1.01718		938	0.642801	-0.776544		938	-0.268104	-0.240535
	939	0.386455	-1.11658		939	0.656607	-0.597065		939	0.315066	-0.0284729
	940	0.207528	-0.798487		940	0.518546	-0.127657		940	0.606652	0.157081
	941	-0.249731	-0.221943		941	0.297648	0.189884		941	0.580144	0.210097
	942	-0.726871	0.374482		942	-0.0198924	0.521231		942	0.288559	0.263112
	943	-0.905798	0.851622		943	-0.447882	0.686904		943	-0.268104	0.157081
	944	-0.70699	1.03055		944	-0.73781	0.686904		944	-0.506674	-0.107996
	945	-0.408778	0.911264		945	-0.779229	0.327945		945	-0.294612	-0.161012
	946	-0.0708035	0.553409		946	-0.599749	-0.113851		946	-0.215089	-0.426089
	947	0.346694	0.0762697		947	-0.323627	-0.514228		947	-0.0295343	-0.214027
	948	0.74431	-0.361108		948	-0.0336985	-0.942218		948	0.103004	0.0510504
	949	0.923238	-0.738844		949	0.242424	-1.1355		949	-0.0295343	-0.0284729
	950	0.664787	-0.778606		950	0.380485	-0.873187		950	0.0499889	0.0510504
	951	0.227409	-0.559917		951	0.352873	-0.251912		951	0.15602	-0.00196515
	952	-0.22985	-0.142419		952	0.159587	0.176078		952	0.341574	-0.134504
	953	-0.70699	0.235316		953	-0.0198924	0.576455		953	0.341574	0.342636
	954	-1.18413	0.553409		954	-0.268403	0.94922		954	0.0499889	0.554698
	955	-1.24377	0.732337		955	-0.434076	1.14251		955	-0.0825499	0.263112
	956	-0.786513	0.692575		956	-0.572137	0.755935		956	-0.347627	-0.0814884
	957	-0.209969	0.473886		957	-0.447882	0.120853		957	-0.586197	-0.479105
	958	0.346694	0.195555		958	-0.365045	-0.389973		958	-0.32112	-0.426089
	959	0.98288	-0.202062		959	-0.130341	-0.873187		959	0.0499889	-0.161012
	960	1.3805	-0.480393		960	0.00771981	-1.20453		960	0.235543	0.0775581
	961	1.10217	-0.500274		961	0.270036	-1.10789		961	0.500621	0.183589
	962	0.386455	-0.341228		962	0.421903	-0.459004		962	0.288559	0.157081
	963	-0.289493	-0.221943		963	0.32526	0.134659		963	-0.00302659	0.0775581
	964	-0.866037	-0.1623		964	0.201005	0.645486		964	-0.0295343	0.104066
	965	-1.38294	0.0762697		965	-0.0336985	0.990638		965	-0.109058	0.236605
	966	-1.34318	0.31484		966	-0.144147	1.18392		966	-0.0825499	0.210097
	967	-0.746752	0.434125		967	-0.516913	0.797353		967	0.129512	0.130574
	968	0.0286006	0.454005		968	-0.66878	0.162271		968	0.0764967	-0.0549807
	969	0.605145	0.473886		969	-0.696392	-0.47281		969	-0.109058	-0.29355
	970	1.18169	0.33472		970	-0.475494	-0.96983		970	-0.162073	-0.29355
	971	1.34074	0.116031		971	-0.351239	-1.27356		971	-0.135565	-0.187519
	972	0.943119	-0.1623		972	0.0767504	-1.17692		972	0.0499889	-0.00196515
	973	0.128005	-0.380989		973	0.449516	-0.624677		973	0.341574	0.210097
	974	-0.488301	-0.540036		974	0.670413	0.0518226		974	0.527128	0.316128
	975	-0.925679	-0.619559		975	0.50474	0.742128		975	0.235543	0.28962
	976	-1.16425	-0.380989		976	0.311454	1.17012		976	0.103004	0.263112
	977	-1.08473	-0.0231345		977	-0.00608631	1.29437		977	-0.188581	-0.0284729
	978	-0.547943	0.374482		978	-0.378851	0.94922		978	-0.374135	-0.107996
	979	0.0683622	0.632933		979	-0.73781	0.300333		979	-0.32112	-0.0549807
	980	0.605145	0.692575		980	-0.765423	-0.445198		980	-0.0560421	-0.0549807
	981	0.98288	0.672694		981	-0.641168	-1.06647		981	0.0499889	-0.0814884
	982	1.14193	0.414244		982	-0.365045	-1.30118		982	-0.0295343	-0.0814884
	983	0.943119	-0.0827769		983	0.00771981	-1.20453		983	-0.0295343	-0.107996
	984	0.446098	-0.579798		984	0.421903	-0.72132		984	0.0764967	-0.107996
	985	-0.110565	-0.858129		985	0.670413	-0.00340191		985	0.15602	-0.00196515
	986	-0.547943	-0.778606		986	0.656607	0.686904		986	0.341574	0.236605
	987	-0.925679	-0.579798		987	0.449516	1.03206		987	0.129512	0.183589
	988	-0.985322	-0.0827769		988	0.035332	1.05967		988	-0.0560421	0.104066
	989	-0.667228	0.493767		989	-0.434076	0.907802		989	-0.135565	0.0245426
	990	-0.0906844	0.931145		990	-0.862066	0.424588		990	-0.241596	-0.107996
	991	0.26717	0.911264		991	-1.01393	-0.210494		991	-0.135565	-0.187519
	992	0.446098	0.672694		992	-0.889678	-0.790351		992	-0.00302659	-0.161012
	993	0.50574	0.354601		993	-0.544525	-0.942218		993	-0.00302659	-0.240535
	994	0.48586	-0.182181		994	-0.0336985	-1.01125		994	0.129512	-0.399581
	995	0.147886	-0.738844		995	0.449516	-0.652289		995	0.209035	-0.29355
	996	-0.269612	-0.957533		996	0.794668	-0.0862386		996	0.0234812	0.104066
	997	-0.508182	-0.858129		997	0.808475	0.631679		997	-0.0295343	0.342636
	998	-0.587705	-0.619559		998	0.628995	0.852577		998	0.0764967	0.28962
	999	-0.587705	-0.281585		999	0.214812	0.88019		999	0.103004	0.104066
	1000	-0.528063	0.354601		1000	-0.254596	0.70071		1000	0.0499889	-0.161012
	1001	-0.269612	0.970907		1001	-0.710198	0.355557		1001	-0.0295343	-0.214027
	1002	-0.0111611	1.11007		1002	-0.862066	-0.265718		1002	-0.215089	-0.267043
	1003	0.108124	0.752218		1003	-0.793035	-0.679902		1003	-0.374135	-0.0549807
	1004	0.287051	0.374482		1004	-0.461688	-0.845575		1004	-0.162073	-0.0284729
	1005	0.525621	-0.1623		1005	-0.088923	-0.804157		1005	0.0764967	-0.267043
	1006	0.50574	-0.738844		1006	0.477128	-0.693708		1006	0.209035	-0.346566
	1007	0.167766	-1.21598		1007	0.767056	-0.265718		1007	0.262051	-0.107996
	1008	-0.0708035	-1.0967		1008	0.849893	0.217496		1008	0.129512	-0.0284729
	1009	-0.110565	-0.599678		1009	0.50474	0.535037		1009	0.0764967	0.422159
	1010	-0.289493	-0.122539		1010	0.104363	0.617873		1010	0.235543	0.554698
	1011	-0.547943	0.513648		1011	-0.406464	0.769741		1011	0.262051	0.104066
	1012	-0.547943	1.12995		1012	-0.793035	0.590261		1012	0.0234812	-0.161012
	1013	-0.408778	1.34864		1013	-1.04155	0.327945		1013	-0.32112	-0.426089
	1014	-0.269612	0.911264		1014	-0.931096	-0.100045		1014	-0.347627	-0.240535
	1015	-0.0310419	0.354601		1015	-0.503107	-0.238106		1015	-0.374135	0.0510504
	1016	0.48586	-0.122539		1016	0.00771981	-0.555647		1016	-0.0295343	0.0510504
	1017	0.585264	-0.718963		1017	0.532352	-0.652289		1017	0.39459	0.0510504
	1018	0.465979	-1.25575		1018	0.794668	-0.47281		1018	0.633159	-0.0284729
	1019	0.24729	-1.15634		1019	0.905117	-0.0448203		1019	0.553636	-0.107996
	1020	0.108124	-0.559917		1020	0.532352	0.189884		1020	0.15602	0.157081
	1021	-0.408778	-0.0628961		1021	0.173393	0.438394		1021	-0.109058	0.342636
	1022	-0.905798	0.374482		1022	-0.323627	0.659292		1022	-0.135565	0.236605
	1023	-0.905798	0.931145		1023	-0.572137	0.769741		1023	0.0234812	0.316128
	1024	-0.667228	1.289		1024	-0.862066	0.466006		1024	0.341574	0.104066
	1025	-0.388897	0.931145		1025	-0.710198	0.120853		1025	0.288559	-0.161012
	1026	-0.0509227	0.31484		1026	-0.42027	-0.307136		1026	-0.00302659	-0.0814884
	1027	0.565383	-0.0827769		1027	0.00771981	-0.652289		1027	-0.162073	-0.161012
	1028	0.943119	-0.341228		1028	0.283842	-0.983636		1028	-0.241596	-0.240535
	1029	1.00276	-0.718963		1029	0.601383	-0.845575		1029	0.0234812	-0.134504
	1030	0.823834	-0.659321		1030	0.601383	-0.54184		1030	0.474113	0.157081
	1031	0.465979	-0.1623		1031	0.421903	0.0656287		1031	0.765698	0.501682
	1032	-0.130446	0.275078		1032	0.0215259	0.466006		1032	0.606652	0.581205
	1033	-0.726871	0.394363		1033	-0.116535	0.921608		1033	0.315066	0.183589
	1034	-0.985322	0.533529		1034	-0.434076	1.03206		1034	-0.0560421	-0.107996
	1035	-0.94556	0.831741		1035	-0.544525	1.01825		1035	-0.294612	-0.240535
	1036	-0.687109	0.732337		1036	-0.627362	0.631679		1036	-0.268104	-0.240535
	1037	-0.190088	0.354601		1037	-0.351239	0.0794348		1037	0.0234812	-0.0549807
	1038	0.545502	0.116031		1038	-0.254596	-0.417585		1038	0.182528	-0.0549807
	1039	1.16181	-0.0430153		1039	-0.0475047	-0.72132		1039	0.341574	0.0510504
	1040	1.3805	-0.321347		1040	0.187199	-0.845575		1040	0.421097	-0.0284729
	1041	1.12205	-0.579798		1041	0.518546	-0.693708		1041	0.368082	-0.187519
	1042	0.545502	-0.341228		1042	0.490934	-0.210494		1042	0.315066	0.0245426
	1043	-0.0708035	-0.0827769		1043	0.366679	0.410782		1043	0.368082	0.28962
	1044	-0.70699	0.0563888		1044	0.159587	0.838771		1044	0.474113	0.448667
	1045	-1.04496	0.155793		1045	-0.0613108	1.04586		1045	0.288559	0.316128
	1046	-1.0052	0.57329		1046	-0.365045	1.05967		1046	-0.109058	-0.0284729
	1047	-0.587705	0.692575		1047	-0.558331	0.70071		1047	-0.162073	-0.29355
	1048	0.0683622	0.533529		1048	-0.558331	0.0104042		1048	-0.215089	-0.267043
	1049	0.724429	0.33472		1049	-0.406464	-0.693708		1049	0.103004	-0.187519
	1050	1.32085	0.33472		1050	-0.226984	-1.14931		1050	0.474113	-0.0284729
	1051	1.34074	0.135912		1051	0.159587	-1.21834		1051	0.712683	-0.00196515
	1052	0.863595	-0.1623		1052	0.490934	-0.997442		1052	0.686175	-0.00196515
	1053	0.128005	-0.261704		1053	0.698026	-0.29333		1053	0.421097	0.0510504
	1054	-0.448539	-0.122539		1054	0.587577	0.4522		1054	0.235543	0.210097
	1055	-0.985322	-0.102658		1055	0.408097	1.14251		1055	0.103004	0.157081
	1056	-1.3233	-0.0628961		1056	0.118169	1.41863		1056	0.129512	0.130574
	1057	-1.08473	0.275078		1057	-0.185566	1.3634		1057	0.209035	0.130574
	1058	-0.388897	0.652814		1058	-0.447882	0.907802		1058	0.15602	-0.00196515
	1059	0.26717	0.632933		1059	-0.530719	0.217496		1059	0.235543	0.157081
	1060	0.684668	0.553409		1060	-0.503107	-0.514228		1060	0.209035	-0.0549807
	1061	0.98288	0.553409		1061	-0.337433	-1.06647		1061	0.262051	-0.426089
	1062	1.16181	0.493767		1062	-0.0475047	-1.24595		1062	0.341574	-0.267043
	1063	0.803953	-0.0231345		1063	0.32526	-0.942218		1063	0.262051	0.0245426
	1064	0.326813	-0.420751		1064	0.532352	-0.320943		1064	0.341574	0.236605
	1065	-0.0708035	-0.440632		1065	0.615189	0.341751		1065	0.421097	0.475174
	1066	-0.388897	-0.420751		1066	0.656607	0.935414		1066	0.474113	0.475174
	1067	-0.766632	-0.380989		1067	0.421903	1.29437		1067	0.421097	0.210097
	1068	-0.806394	0.0762697		1068	0.0491382	1.26676		1068	0.129512	-0.134504
	1069	-0.329254	0.81186		1069	-0.42027	0.755935		1069	0.0499889	-0.0814884
	1070	0.128005	1.14983		1070	-0.599749	0.0656287		1070	0.209035	-0.00196515
	1071	0.24729	1.03055		1071	-0.751617	-0.486616		1071	0.315066	-0.0814884
	1072	0.446098	0.871503		1072	-0.641168	-0.928412		1072	0.341574	0.0245426
	1073	0.724429	0.692575		1073	-0.323627	-1.05267		1073	0.39459	0.0245426
	1074	0.704549	0.0762697		1074	0.270036	-0.776544		1074	0.288559	0.130574
	1075	0.227409	-0.619559		1075	0.615189	-0.100045		1075	0.500621	0.263112
	1076	-0.209969	-0.798487		1076	0.808475	0.493618		1076	0.659667	0.183589
	1077	-0.448539	-0.579798		1077	0.725638	0.824965		1077	0.606652	0.0510504
	1078	-0.647347	-0.261704		1078	0.642801	1.18392		1078	0.447605	0.236605
	1079	-0.587705	0.116031		1079	0.131975	1.18392		1079	0.15602	0.369143
	1080	-0.289493	0.752218		1080	-0.351239	0.852577		1080	-0.0825499	0.210097
	1081	0.128005	1.24924		1081	-0.779229	0.176078		1081	0.0764967	0.104066
	1082	0.287051	1.289		1082	-0.73781	-0.169075		1082	0.368082	-0.107996
	1083	0.446098	0.990788		1083	-0.641168	-0.583259		1083	0.553636	-0.161012
	1084	0.724429	0.593171		1084	-0.309821	-0.804157		1084	0.447605	-0.00196515
	1085	0.823834	-0.0827769		1085	0.25623	-0.817963		1085	0.288559	0.0775581
	1086	0.704549	-0.718963		1086	0.780862	-0.265718		1086	0.341574	0.157081
	1087	0.346694	-0.997295		1087	0.946536	0.134659		1087	0.553636	0.236605
	1088	0.167766	-0.778606		1088	0.711832	0.493618		1088	0.633159	0.157081
	1089	0.0286006	-0.420751		1089	0.463322	0.797353		1089	0.633159	0.183589
	1090	-0.110565	0.175674		1090	-0.0336985	1.08728		1090	0.500621	0.342636
	1091	-0.289493	0.911264		1091	-0.599749	0.94922		1091	0.341574	0.236605
	1092	-0.190088	1.42817		1092	-1.02774	0.4522		1092	0.368082	0.104066
	1093	0.00871976	1.36852		1093	-0.903484	0.0104042		1093	0.209035	-0.0549807
	1094	0.0683622	1.20948		1094	-0.599749	-0.279524		1094	0.315066	-0.267043
	1095	0.207528	0.692575		1095	-0.24079	-0.403779		1095	0.447605	-0.267043
	1096	0.446098	-0.122539		1096	0.242424	-0.459004		1096	0.447605	-0.0284729
	1097	0.724429	-0.917772		1097	0.725638	-0.279524		1097	0.659667	0.236605
	1098	0.525621	-0.917772		1098	1.00176	0.0518226		1098	0.73919	0.236605
	1099	0.406336	-0.718963		1099	0.808475	0.396975		1099	0.659667	0.369143
	1100	0.346694	-0.460513		1100	0.490934	0.645486		1100	0.659667	0.316128
	1101	0.0484814	0.116031		1101	0.131975	0.783547		1101	0.527128	0.210097
	1102	-0.488301	1.09019		1102	-0.268403	0.893996		1102	0.341574	0.104066
	1103	-0.687109	1.48781		1103	-0.654974	0.714516		1103	0.527128	0.0245426
	1104	-0.428658	1.22936		1104	-0.710198	0.396975		1104	0.421097	-0.00196515
	1105	-0.190088	0.990788		1105	-0.503107	-0.0448203		1105	0.262051	0.0510504
	1106	0.0683622	0.732337		1106	-0.0336985	-0.320943		1106	0.209035	0.104066
	1107	0.605145	-0.0231345		1107	0.173393	-0.610871		1107	0.262051	-0.0549807
	1108	1.14193	-0.679202		1108	0.546158	-0.693708		1108	0.686175	-0.0549807
	1109	1.08228	-0.520155		1109	0.68422	-0.431392		1109	1.05728	0.0510504
	1110	0.74431	0.0166272		1110	0.670413	0.0518226		1110	1.18982	0.183589
	1111	0.366575	0.116031		1111	0.394291	0.4522		1111	0.898237	0.395651
	1112	-0.150327	0.235316		1112	0.0905565	0.769741		1112	0.315066	0.448667
	1113	-0.786513	0.772099		1113	-0.088923	1.03206		1113	-0.00302659	0.263112
	1114	-1.10461	1.12995		1114	-0.406464	1.08728		1114	0.129512	0.157081
	1115	-0.846156	0.871503		1115	-0.516913	0.783547		1115	0.368082	-0.0549807
	1116	-0.369016	0.672694		1116	-0.475494	0.369363		1116	0.659667	-0.214027
	1117	0.128005	0.712456		1117	-0.144147	-0.0586264		1117	0.659667	-0.161012
	1118	0.843714	0.394363		1118	0.0629443	-0.500422		1118	0.474113	-0.0284729
	1119	1.36062	-0.281585		1119	0.366679	-0.790351		1119	0.527128	0.157081
	1120	1.40038	-0.40087		1120	0.587577	-0.638483		1120	0.606652	0.157081
	1121	0.883476	-0.0628961		1121	0.725638	-0.141463		1121	0.765698	0.0775581
	1122	0.326813	-0.0231345		1122	0.559964	0.355557		1122	1.13681	0.316128
	1123	-0.209969	-0.241824		1123	0.352873	0.742128		1123	0.97776	0.28962
	1124	-0.70699	0.116031		1124	0.145781	1.18392		1124	0.633159	0.369143
	1125	-0.965441	0.712456		1125	-0.088923	1.32199		1125	0.235543	0.395651
	1126	-0.786513	0.791979		1126	-0.337433	1.03206		1126	0.0499889	0.130574
	1127	-0.269612	0.652814		1127	-0.461688	0.341751		1127	0.262051	0.0245426
	1128	0.306932	0.891384		1128	-0.309821	-0.182881		1128	0.606652	-0.187519
	1129	0.962999	0.891384		1129	-0.088923	-0.735126		1129	0.898237	-0.240535
	1130	1.46002	0.31484		1130	0.159587	-1.05267		1130	1.00427	-0.0814884
	1131	1.53954	-0.142419		1131	0.380485	-0.997442		1131	0.871729	0.236605
	1132	1.04252	0.0961505		1132	0.642801	-0.431392		1132	0.765698	0.475174
	1133	0.306932	0.195555		1133	0.68422	0.20369		1133	0.633159	0.581205
	1134	-0.309373	-0.202062		1134	0.573771	0.769741		1134	0.765698	0.316128
	1135	-0.806394	-0.1623		1135	0.270036	1.33579		1135	0.818714	0.0245426
	1136	-1.06484	0.473886		1136	0.0905565	1.62572		1136	0.792206	-0.00196515
	1137	-0.965441	0.81186		1137	-0.226984	1.3496		1137	0.606652	0.183589
	1138	-0.289493	0.632933		1138	-0.323627	0.70071		1138	0.39459	0.183589
	1139	0.465979	0.712456		1139	-0.406464	0.0656287		1139	0.262051	0.183589
	1140	0.962999	0.931145		1140	-0.24079	-0.555647		1140	0.447605	0.0245426
	1141	1.24133	0.57329		1141	-0.0475047	-1.01125		1141	0.924745	-0.107996
	1142	1.36062	-0.0430153		1142	0.311454	-1.10789		1142	1.21633	-0.0814884
	1143	1.08228	-0.0628961		1143	0.656607	-0.569453		1143	1.26935	0.104066
	1144	0.446098	0.0961505		1144	0.767056	0.134659		1144	1.1103	0.395651
	1145	-0.0509227	-0.221943		1145	0.711832	0.783547		1145	0.712683	0.581205
	1146	-0.269612	-0.460513		1146	0.559964	1.25295		1146	0.341574	0.52819
	1147	-0.508182	0.0961505		1147	0.339067	1.41863		1147	0.368082	0.263112
	1148	-0.528063	0.732337		1148	-0.0475047	1.25295		1148	0.580144	0.0510504
	1149	-0.0111611	0.831741		1149	-0.351239	0.604067		1149	0.898237	-0.0549807
	1150	0.704549	0.871503		1150	-0.516913	-0.0448203		1150	1.08379	-0.107996
	1151	0.903357	1.34864		1151	-0.503107	-0.707514		1151	0.924745	-0.00196515
	1152	0.923238	1.34864		1152	-0.378851	-0.956024		1152	0.712683	0.210097
	1153	0.98288	0.752218		1153	0.0491382	-1.02505		1153	0.845222	0.369143
	1154	0.863595	0.116031		1154	0.532352	-0.500422		1154	0.871729	0.316128
	1155	0.227409	-0.102658		1155	0.877505	0.148465		1155	0.97776	0.236605
	1156	-0.269612	-0.500274		1156	0.974148	0.921608		1156	1.16331	0.183589
	1157	-0.388897	-0.718963		1157	0.780862	1.23915		1157	0.924745	0.236605
	1158	-0.408778	-0.241824		1158	0.518546	1.47385		1158	0.686175	0.342636
	1159	-0.408778	0.593171		1159	0.00771981	1.26676		1159	0.659667	0.52819
	1160	-0.0310419	1.03055		1160	-0.337433	0.783547		1160	0.606652	0.28962
	1161	0.426217	1.289		1161	-0.585943	-0.00340191		1161	0.527128	0.0775581
	1162	0.565383	1.64685		1162	-0.544525	-0.47281		1162	0.818714	-0.214027
	1163	0.585264	1.50769		1163	-0.296015	-0.693708		1163	0.845222	-0.267043
	1164	0.843714	0.613052		1164	0.118169	-0.72132		1164	0.845222	0.0245426
	1165	0.962999	-0.241824		1165	0.68422	-0.528034		1165	0.924745	0.369143
	1166	0.684668	-0.500274		1166	1.02937	0.0380164		1166	0.845222	0.448667
	1167	0.346694	-0.579798		1167	1.07079	0.562649		1167	1.03078	0.395651
	1168	0.26717	-0.579798		1168	0.725638	0.893996		1168	1.21633	0.236605
	1169	0.108124	-0.122539		1169	0.352873	0.990638		1169	1.05728	0.0775581
	1170	-0.0509227	0.81186		1170	-0.185566	1.01825		1170	0.792206	0.263112
	1171	-0.0906844	1.40828		1171	-0.599749	0.714516		1171	0.606652	0.395651
	1172	0.0683622	1.48781		1172	-0.862066	0.258914		1172	0.553636	0.263112
	1173	0.147886	1.50769		1173	-0.641168	-0.169075		1173	0.712683	0.157081
	1174	0.24729	1.36852		1174	-0.24079	-0.376167		1174	0.951253	-0.0549807
	1175	0.48586	0.672694		1175	0.297648	-0.486616		1175	1.05728	-0.107996
	1176	0.74431	-0.261704		1176	0.849893	-0.403779		1176	1.16331	0.104066
	1177	0.764191	-0.659321		1177	1.18124	-0.0586264		1177	1.18982	0.263112
	1178	0.704549	-0.520155		1178	1.19505	0.369363		1178	0.951253	0.475174
	1179	0.585264	-0.380989		1179	0.905117	0.742128		1179	0.845222	0.581205
	1180	0.386455	-0.142419		1180	0.518546	0.907802		1180	0.924745	0.316128
	1181	0.108124	0.593171		1181	0.0767504	1.04586		1181	0.845222	0.130574
	1182	-0.22985	1.30888		1182	-0.351239	0.963026		1182	0.898237	0.157081
	1183	-0.309373	1.50769		1183	-0.613555	0.659292		1183	0.871729	0.236605
	1184	-0.190088	1.3884		1184	-0.544525	0.217496		1184	0.73919	0.28962
	1185	0.167766	1.24924		1185	-0.296015	-0.113851		1185	0.73919	0.210097
	1186	0.625025	0.851622		1186	0.187199	-0.320943		1186	0.871729	-0.0284729
	1187	1.04252	0.0961505		1187	0.601383	-0.431392		1187	1.03078	-0.0814884
	1188	1.40038	-0.321347		1188	0.974148	-0.348555		1188	1.24284	0.0245426
	1189	1.42026	-0.241824		1189	0.974148	-0.0310141		1189	1.42839	0.316128
	1190	1.10217	-0.102658		1190	0.794668	0.327945		1190	1.34887	0.687236
	1191	0.50574	-0.00325364		1191	0.394291	0.659292		1191	1.1103	0.687236
	1192	-0.110565	0.454005		1192	0.118169	0.88019		1192	0.898237	0.448667
	1193	-0.587705	1.12995		1193	-0.268403	1.04586		1193	0.818714	0.157081
	1194	-0.786513	1.34864		1194	-0.42027	0.976832		1194	0.818714	-0.0549807
	1195	-0.607586	1.24924		1195	-0.475494	0.70071		1195	0.97776	0.0510504
	1196	-0.0906844	1.07031		1196	-0.17176	0.314139		1196	1.13681	0.263112
	1197	0.50574	0.851622		1197	0.0767504	-0.169075		1197	1.03078	0.263112
	1198	1.14193	0.275078		1198	0.50474	-0.459004		1198	0.97776	0.263112
	1199	1.63895	-0.202062		1199	0.780862	-0.569453		1199	1.16331	0.130574
	1200	1.69859	-0.241824		1200	0.960342	-0.320943		1200	1.34887	0.0510504
	1201	1.28109	-0.0628961		1201	0.794668	0.148465		1201	1.53442	0.448667
	1202	0.625025	0.0563888		1202	0.601383	0.617873		1202	1.48141	0.660729
	1203	0.0484814	0.275078		1203	0.297648	1.10109		1203	1.26935	0.660729
	1204	-0.528063	0.752218		1204	-0.0198924	1.29437		1204	0.871729	0.554698
	1205	-0.70699	1.07031		1205	-0.282209	1.30818		1205	0.606652	0.183589
	1206	-0.428658	1.09019		1206	-0.309821	0.963026		1206	0.73919	-0.107996
	1207	0.147886	0.990788		1207	-0.17176	0.396975		1207	1.1103	-0.107996
	1208	0.684668	0.970907		1208	-0.0198924	-0.182881		1208	1.34887	0.130574
	1209	1.24133	0.791979		1209	0.270036	-0.693708		1209	1.4549	0.369143
	1210	1.71847	0.434125		1210	0.490934	-0.804157		1210	1.37538	0.422159
	1211	1.63895	0.33472		1211	0.670413	-0.597065		1211	1.26935	0.342636
	1212	1.16181	0.434125		1212	0.628995	-0.0724325		1212	1.32236	0.422159
	1213	0.585264	0.473886		1213	0.546158	0.493618		1213	1.29585	0.395651
	1214	-0.0509227	0.354601		1214	0.435709	1.10109		1214	1.24284	0.475174
	1215	-0.687109	0.434125		1215	0.214812	1.50146		1215	1.1103	0.554698
	1216	-0.925679	0.752218		1216	0.0629443	1.55669		1216	0.818714	0.395651
	1217	-0.607586	0.990788		1217	-0.116535	1.08728		1217	0.818714	0.28962
	1218	-0.0708035	1.09019		1218	-0.0751169	0.521231		1218	0.951253	0.0245426
	1219	0.50574	1.14983		1219	-0.088923	-0.155269		1219	1.24284	-0.107996
	1220	1.18169	1.11007		1220	0.104363	-0.72132		1220	1.37538	0.0245426
	1221	1.61907	0.81186		1221	0.297648	-1.01125		1221	1.42839	0.157081
	1222	1.53954	0.374482		1222	0.68422	-0.762738		1222	1.42839	0.316128
	1223	1.08228	0.0961505		1223	0.794668	-0.182881		1223	1.34887	0.634221
	1224	0.644906	-0.0231345		1224	0.849893	0.410782		1224	1.29585	0.581205
	1225	0.108124	-0.142419		1225	0.739444	1.07348		1225	1.13681	0.554698
	1226	-0.349135	-0.0827769		1226	0.656607	1.55669		1226	0.951253	0.448667
	1227	-0.547943	0.354601		1227	0.283842	1.5843		1227	1.05728	0.104066
	1228	-0.249731	0.891384		1228	-0.0751169	1.07348		1228	1.13681	-0.0549807
	1229	0.227409	1.22936		1229	-0.351239	0.438394		1229	1.1103	-0.00196515
	1230	0.764191	1.40828		1230	-0.392658	-0.251912		1230	1.24284	0.183589
	1231	1.18169	1.48781		1231	-0.323627	-0.776544		1231	1.21633	0.475174
	1232	1.36062	1.22936		1232	0.00771981	-1.01125		1232	1.16331	0.448667
	1233	1.26121	0.652814		1233	0.559964	-0.707514		1233	1.4549	0.157081
	1234	0.823834	0.175674		1234	0.877505	-0.182881		1234	1.64045	0.104066
	1235	0.366575	-0.102658		1235	1.01557	0.576455		1235	1.64045	0.342636
	1236	-0.0310419	-0.321347		1236	0.960342	1.30818		1236	1.50792	0.713744
	1237	-0.289493	-0.301466		1237	0.863699	1.72236		1237	1.18982	0.634221
	1238	-0.369016	0.175674		1238	0.435709	1.65333		1238	0.871729	0.501682
	1239	-0.289493	0.791979		1239	-0.0475047	1.21154		1239	0.871729	0.210097
	1240	0.0484814	1.20948		1240	-0.337433	0.645486		1240	1.13681	-0.0549807
	1241	0.465979	1.52757		1241	-0.309821	-0.127657		1241	1.48141	0.0510504
	1242	0.664787	1.62697		1242	-0.199372	-0.679902		1242	1.64045	0.263112
	1243	0.863595	1.34864		1243	0.131975	-0.845575		1243	1.53442	0.475174
	1244	0.98288	0.652814		1244	0.628995	-0.569453		1244	1.42839	0.369143
	1245	1.0624	0.036508		1245	1.12602	-0.210494		1245	1.40188	0.210097
	1246	0.784072	-0.361108		1246	1.26408	0.396975		1246	1.42839	0.263112
	1247	0.465979	-0.540036		1247	1.13982	0.921608		1247	1.56093	0.422159
	1248	0.306932	-0.40087		1248	0.836087	1.26676		1248	1.40188	0.687236
	1249	0.26717	0.0961505		1249	0.435709	1.15631		1249	1.26935	0.793267
	1250	0.167766	0.752218		1250	-0.144147	1.00444		1250	1.29585	0.422159
	1251	0.128005	1.42817		1251	-0.4893	0.659292		1251	1.18982	0.130574
	1252	0.306932	1.84566		1252	-0.530719	0.162271		1252	1.21633	0.183589
	1253	0.446098	1.86554		1253	-0.309821	-0.29333		1253	1.37538	-0.00196515
	1254	0.565383	1.36852		1254	0.00771981	-0.47281		1254	1.53442	0.157081
	1255	0.823834	0.732337		1255	0.490934	-0.403779		1255	1.56093	0.316128
	1256	1.10217	0.116031		1256	1.02937	-0.155269		1256	1.53442	0.422159
	1257	1.08228	-0.361108		1257	1.27788	0.341751		1257	1.58744	0.687236
	1258	0.843714	-0.579798		1258	1.19505	0.935414		1258	1.48141	0.607713
	1259	0.74431	-0.301466		1259	0.877505	1.15631		1259	1.58744	0.501682
	1260	0.585264	0.255197		1260	0.477128	1.25295		1260	1.58744	0.52819
	1261	0.187647	0.911264		1261	-0.0751169	1.1287		1261	1.4549	0.342636
	1262	-0.190088	1.48781		1262	-0.406464	0.893996		1262	1.32236	0.369143
	1263	-0.110565	1.8059		1263	-0.558331	0.355557		1263	1.16331	0.342636
	1264	0.147886	1.7065		1264	-0.309821	-0.00340191		1264	1.05728	0.236605
	1265	0.406336	1.16972		1265	-0.0336985	-0.210494		1265	1.48141	0.28962
	1266	0.764191	0.672694		1266	0.559964	-0.320943		1266	1.77299	0.263112
	1267	1.16181	0.255197		1267	0.93273	-0.348555		1267	1.82601	0.342636
	1268	1.40038	-0.0430153		1268	1.23646	0.0104042		1268	1.85252	0.422159
	1269	1.32085	-0.301466		1269	1.0984	0.438394		1269	1.64045	0.607713
	1270	1.10217	-0.142419		1270	0.905117	0.714516		1270	1.40188	0.740252
	1271	0.74431	0.374482		1271	0.435709	0.976832		1271	1.53442	0.554698
	1272	0.207528	0.970907		1272	0.035332	1.08728		1272	1.53442	0.554698
	1273	-0.22985	1.32876		1273	-0.365045	0.94922		1273	1.53442	0.316128
	1274	-0.408778	1.50769		1274	-0.406464	0.493618		1274	1.48141	0.130574
	1275	-0.209969	1.56733		1275	-0.268403	0.27272		1275	1.24284	0.263112
	1276	0.187647	1.36852		1276	0.104363	0.0380164		1276	1.26935	0.342636
	1277	0.764191	0.911264		1277	0.463322	-0.251912		1277	1.66696	0.236605
	1278	1.34074	0.493767		1278	0.877505	-0.403779		1278	1.77299	0.236605
	1279	1.79799	0.155793		1279	1.07079	-0.169075		1279	1.98505	0.342636
	1280	1.75823	-0.0430153		1280	1.07079	0.162271		1280	1.95855	0.395651
	1281	1.28109	-0.0430153		1281	0.849893	0.438394		1281	1.58744	0.76676
	1282	0.585264	0.31484		1282	0.656607	0.907802		1282	1.34887	0.925806
	1283	-0.0111611	0.772099		1283	0.297648	1.26676		1283	1.29585	0.76676
	1284	-0.46842	1.03055		1284	-0.0336985	1.3634		1284	1.4549	0.369143
	1285	-0.687109	1.16972		1285	-0.254596	1.08728		1285	1.66696	-0.0284729
	1286	-0.428658	1.289		1286	-0.088923	0.811159		1286	1.66696	-0.0549807
	1287	0.147886	1.24924		1287	0.104363	0.27272		1287	1.50792	0.210097
	1288	0.823834	0.851622		1288	0.339067	-0.279524		1288	1.40188	0.475174
	1289	1.44014	0.513648		1289	0.670413	-0.610871		1289	1.61395	0.607713
	1290	1.97692	0.414244		1290	0.946536	-0.583259		1290	1.82601	0.52819
	1291	1.95704	0.493767		1291	1.02937	-0.320943		1291	2.09109	0.316128
	1292	1.36062	0.414244		1292	0.808475	0.189884		1292	2.09109	0.395651
	1293	0.545502	0.513648		1293	0.68422	0.88019		1293	1.87902	0.793267
	1294	-0.0310419	0.772099		1294	0.449516	1.37721		1294	1.50792	0.793267
	1295	-0.508182	0.891384		1295	0.201005	1.47385		1295	1.21633	0.607713
	1296	-0.806394	0.851622		1296	-0.0198924	1.46005		1296	1.24284	0.236605
	1297	-0.547943	0.970907		1297	0.0629443	1.00444		1297	1.48141	0.0510504
	1298	0.167766	1.1896		1298	0.242424	0.396975		1298	1.74649	0.183589
	1299	0.883476	1.14983		1299	0.32526	-0.417585		1299	1.90553	0.342636
	1300	1.32085	0.911264		1300	0.50474	-0.666096		1300	1.7995	0.554698
	1301	1.61907	0.831741		1301	0.767056	-0.817963		1301	1.82601	0.687236
	1302	1.69859	0.692575		1302	1.00176	-0.47281		1302	1.93204	0.581205
	1303	1.24133	0.31484		1303	1.01557	0.0932409		1303	1.93204	0.554698
	1304	0.565383	0.036508		1304	0.877505	0.921608		1304	1.90553	0.660729
	1305	0.108124	0.0961505		1305	0.780862	1.33579		1305	1.64045	0.52819
	1306	-0.110565	0.294959		1306	0.532352	1.62572		1306	1.37538	0.554698
	1307	-0.269612	0.513648		1307	0.201005	1.51527		1307	1.32236	0.554698
	1308	-0.0708035	0.951026		1308	-0.088923	1.15631		1308	1.37538	0.369143
	1309	0.545502	1.52757		1309	-0.088923	0.258914		1309	1.64045	0.422159
	1310	1.20157	1.8059		1310	-0.0336985	-0.320943		1310	2.03807	0.342636
	1311	1.42026	1.62697		1311	0.145781	-0.748932		1311	2.17061	0.130574
	1312	1.49978	1.289		1312	0.394291	-0.707514		1312	2.1441	0.316128
	1313	1.53954	0.831741		1313	0.849893	-0.445198		1313	1.7995	0.660729
	1314	1.24133	0.294959		1314	1.0846	0.355557		1314	1.74649	0.925806
	1315	0.605145	-0.182181		1315	1.16743	1.08728		1315	1.77299	0.952314
	1316	0.0683622	-0.0827769		1316	1.00176	1.52908		1316	1.77299	0.713744
	1317	-0.150327	0.255197		1317	0.780862	1.66714		1317	1.98505	0.342636
	1318	-0.22985	0.712456		1318	0.283842	1.62572		1318	1.7995	0.263112
	1319	-0.110565	1.01067		1319	-0.0751169	1.17012		1319	1.58744	0.448667
	1320	0.326813	1.54745		1320	-0.282209	0.410782		1320	1.66696	0.369143
	1321	0.883476	1.86554		1321	-0.0475047	-0.238106		1321	1.7995	0.448667
	1322	1.12205	1.72638		1322	0.201005	-0.583259		1322	1.98505	0.687236
	1323	1.12205	1.1896		1323	0.601383	-0.679902		1323	2.25013	0.607713
	1324	1.22145	0.752218		1324	1.00176	-0.514228		1324	2.19712	0.554698
	1325	1.26121	0.275078		1325	1.36072	0.0656287		1325	2.03807	0.634221
	1326	0.943119	-0.221943		1326	1.40214	0.728322		1326	1.95855	0.687236
	1327	0.50574	-0.40087		1327	1.15363	1.21154		1327	1.74649	0.76676
	1328	0.465979	0.0762697		1328	0.808475	1.41863		1328	1.69347	0.687236
	1329	0.605145	0.613052		1329	0.380485	1.40482		1329	1.71998	0.369143
	1330	0.48586	1.09019		1330	-0.157954	0.976832		1330	1.7995	0.28962
	1331	0.326813	1.66674		1331	-0.475494	0.4522		1331	1.93204	0.422159
	1332	0.525621	2.30292		1332	-0.378851	-0.127657		1332	1.95855	0.475174
	1333	0.903357	2.16376		1333	-0.0475047	-0.348555		1333	1.98505	0.634221
	1334	0.962999	1.3884		1334	0.339067	-0.514228		1334	2.03807	0.554698
	1335	1.0624	0.791979		1335	0.822281	-0.210494		1335	1.95855	0.395651
	1336	1.36062	0.473886		1336	1.30549	0.120853		1336	2.09109	0.501682
	1337	1.3805	-0.0827769		1337	1.47117	0.645486		1337	2.22362	0.554698
	1338	1.04252	-0.500274		1338	1.25027	1.07348		1338	1.95855	0.713744
	1339	0.784072	-0.1623		1339	0.93273	1.44624		1339	1.7995	0.872791
	1340	0.764191	0.632933		1340	0.518546	1.41863		1340	1.74649	0.740252
	1341	0.465979	1.22936		1341	0.0491382	1.10109		1341	1.7995	0.581205
	1342	-0.0509227	1.66674		1342	-0.268403	0.70071		1342	1.85252	0.422159
	1343	0.00871976	2.14388		1343	-0.185566	0.245108		1343	1.98505	0.236605
	1344	0.426217	2.08423		1344	0.0767504	-0.238106		1344	2.01156	0.263112
	1345	0.704549	1.34864		1345	0.477128	-0.445198		1345	2.01156	0.395651
	1346	0.903357	0.632933		1346	0.974148	-0.307136		1346	2.06458	0.607713
	1347	1.34074	0.255197		1347	1.47117	-0.0310141		1347	2.1441	0.660729
	1348	1.65883	-0.122539		1348	1.59542	0.300333		1348	2.06458	0.687236
	1349	1.42026	-0.380989		1349	1.38833	0.728322		1349	2.06458	0.952314
	1350	1.04252	-0.00325364		1350	1.01557	1.07348		1350	2.19712	0.952314
	1351	0.684668	0.772099		1351	0.559964	1.14251		1351	2.11759	0.660729
	1352	0.26717	1.24924		1352	0.0215259	1.05967		1352	2.09109	0.342636
	1353	-0.170208	1.48781		1353	-0.296015	0.921608		1353	1.87902	0.316128
	1354	-0.190088	1.8059		1354	-0.282209	0.590261		1354	1.61395	0.342636
	1355	0.0683622	1.86554		1355	0.035332	0.20369		1355	1.85252	0.581205
	1356	0.465979	1.36852		1356	0.449516	-0.0586264		1356	2.25013	0.793267
	1357	0.923238	0.871503		1357	0.93273	-0.169075		1357	2.4887	0.607713
	1358	1.5793	0.672694		1358	1.30549	-0.196688		1358	2.4887	0.422159
	1359	1.91728	0.434125		1359	1.41594	0.0656287		1359	2.27664	0.581205
	1360	1.85764	0.0762697		1360	1.20885	0.466006		1360	2.09109	0.713744
	1361	1.44014	0.155793		1361	0.960342	0.797353		1361	2.06458	0.872791
	1362	0.863595	0.613052		1362	0.642801	1.00444		1362	1.95855	1.05834
	1363	0.24729	0.970907		1363	0.297648	1.26676		1363	1.98505	0.819775
	1364	-0.249731	1.12995		1364	-0.0336985	1.32199		1364	1.90553	0.475174
	1365	-0.369016	1.3884		1365	-0.0475047	0.976832		1365	1.77299	0.342636
	1366	-0.170208	1.58721		1366	0.201005	0.493618		1366	2.03807	0.342636
	1367	0.24729	1.40828		1367	0.50474	0.0794348		1367	2.17061	0.475174
	1368	1.02264	1.07031		1368	0.780862	-0.265718		1368	2.30315	0.607713
	1369	1.73835	0.851622		1369	1.13982	-0.54184		1369	2.43569	0.76676
	1370	2.19561	0.613052		1370	1.33311	-0.376167		1370	2.40918	0.793267
	1371	1.9968	0.434125		1371	1.27788	0.0794348		1371	2.30315	0.819775
	1372	1.51966	0.434125		1372	0.960342	0.548843		1372	2.22362	0.76676
	1373	0.784072	0.712456		1373	0.75325	0.990638		1373	2.06458	0.925806
	1374	0.0286006	0.911264		1374	0.490934	1.44624		1374	2.11759	0.952314
	1375	-0.408778	0.970907		1375	0.25623	1.63953		1375	2.03807	0.846283
	1376	-0.428658	1.16972		1376	0.118169	1.33579		1376	2.1441	0.554698
	1377	-0.0111611	1.48781		1377	0.25623	0.811159		1377	2.25013	0.263112
	1378	0.525621	1.54745		1378	0.490934	0.300333		1378	2.35616	0.28962
	1379	1.32085	1.32876		1379	0.601383	-0.196688		1379	2.46219	0.52819
	1380	1.87752	1.12995		1380	0.808475	-0.638483		1380	2.46219	0.740252
	1381	2.09621	1.09019		1381	1.00176	-0.610871		1381	2.4887	1.08485
	1382	1.79799	0.871503		1382	1.20885	-0.0862386		1382	2.51521	1.08485
	1383	1.32085	0.493767		1383	1.05698	0.617873		1383	2.35616	0.925806
	1384	0.74431	0.294959		1384	0.974148	1.18392		1384	2.25013	0.819775
	1385	0.306932	0.374482		1385	0.780862	1.59811		1385	2.19712	0.607713
	1386	0.0484814	0.454005		1386	0.601383	1.68094		1386	1.93204	0.607713
	1387	0.00871976	0.672694		1387	0.187199	1.40482		1387	2.03807	0.872791
	1388	0.26717	1.1896		1388	0.0767504	0.728322		1388	2.17061	0.740252
	1389	0.803953	1.7065		1389	0.131975	0.0656287		1389	2.27664	0.581205
	1390	1.46002	1.82578		1390	0.311454	-0.54184		1390	2.54172	0.52819
	1391	1.79799	1.62697		1391	0.477128	-0.693708		1391	2.51521	0.475174
	1392	1.8974	1.42817		1392	0.849893	-0.638483		1392	2.62124	0.660729
	1393	1.75823	1.03055		1393	1.22266	-0.100045		1393	2.78029	0.978822
	1394	1.44014	0.454005		1394	1.36072	0.535037		1394	2.64775	1.11136
	1395	0.883476	0.0762697		1395	1.22266	1.29437		1395	2.51521	1.03184
	1396	0.446098	0.175674		1396	1.11221	1.66714		1396	2.17061	0.793267
	1397	0.128005	0.434125		1397	0.794668	1.72236		1397	1.7995	0.448667
	1398	0.0683622	0.791979		1398	0.449516	1.44624		1398	1.98505	0.501682
	1399	0.26717	1.36852		1399	0.118169	0.94922		1399	2.11759	0.740252
	1400	0.605145	1.88542		1400	0.159587	0.176078		1400	2.54172	0.793267
	1401	0.923238	2.02459		1401	0.32526	-0.389973		1401	2.88632	0.872791
	1402	1.16181	1.74626		1402	0.642801	-0.610871		1402	2.72727	0.713744
	1403	1.4799	1.36852		1403	1.01557	-0.54184		1403	2.46219	0.554698
	1404	1.65883	0.831741		1404	1.38833	-0.251912		1404	2.35616	0.793267
	1405	1.42026	0.175674		1405	1.554	0.424588		1405	2.30315	0.846283
	1406	1.08228	-0.202062		1406	1.51259	1.22534		1406	2.40918	1.05834
	1407	0.764191	-0.122539		1407	1.23646	1.5705		1407	2.40918	1.19088
	1408	0.48586	0.195555		1408	0.877505	1.5843		1408	2.27664	0.872791
	1409	0.287051	0.712456		1409	0.449516	1.37721		1409	2.30315	0.581205
	1410	0.446098	1.42817		1410	0.0629443	0.976832		1410	2.22362	0.342636
	1411	0.74431	2.08423		1411	-0.0613108	0.217496		1411	2.40918	0.263112
	1412	0.863595	2.24328		1412	0.0491382	-0.279524		1412	2.62124	0.713744
	1413	0.943119	1.94507		1413	0.463322	-0.54184		1413	2.72727	0.925806
	1414	1.26121	1.54745		1414	0.863699	-0.514228		1414	2.67426	0.925806
	1415	1.46002	1.07031		1415	1.33311	-0.389973		1415	2.64775	0.952314
	1416	1.36062	0.414244		1416	1.56781	0.424588		1416	2.64775	0.740252
	1417	1.20157	-0.0430153		1417	1.58162	1.10109		1417	2.56823	0.634221
	1418	1.18169	-0.0827769		1418	1.29169	1.5843		1418	2.40918	0.740252
	1419	1.08228	0.235316		1419	0.974148	1.50146		1419	2.46219	0.872791
	1420	0.74431	0.712456		1420	0.559964	1.47385		1420	2.4887	1.05834
	1421	0.545502	1.34864		1421	0.159587	1.00444		1421	2.46219	0.952314
	1422	0.446098	1.98483		1422	-0.00608631	0.424588		1422	2.56823	0.76676
	1423	0.386455	2.18364		1423	0.131975	-0.0448203		1423	2.46219	0.581205
	1424	0.545502	1.94507		1424	0.559964	-0.210494		1424	2.51521	0.475174
	1425	1.00276	1.54745		1425	0.974148	-0.2243		1425	2.75378	0.713744
	1426	1.49978	1.07031		1426	1.47117	-0.182881		1426	2.88632	1.00533
	1427	1.65883	0.473886		1427	1.69207	0.286527		1427	2.88632	1.05834
	1428	1.69859	-0.00325364		1428	1.71968	0.728322		1428	2.75378	0.952314
	1429	1.73835	0.036508		1429	1.37453	1.04586		1429	2.51521	0.899298
	1430	1.59919	0.434125		1430	1.05698	1.05967		1430	2.46219	0.899298
	1431	1.00276	0.931145		1431	0.532352	1.21154		1431	2.35616	0.872791
	1432	0.465979	1.40828		1432	0.118169	1.08728		1432	2.38267	0.846283
	1433	0.187647	1.90531		1433	-0.144147	0.838771		1433	2.43569	0.76676
	1434	0.187647	2.12399		1434	0.0491382	0.27272		1434	2.62124	0.740252
	1435	0.287051	1.98483		1435	0.449516	0.120853		1435	2.85981	0.52819
	1436	0.704549	1.62697		1436	0.93273	-0.0448203		1436	2.96584	0.448667
	1437	1.42026	1.20948		1437	1.30549	0.0242103		1437	3.01886	0.76676
	1438	2.03656	0.692575		1438	1.63684	0.0794348		1438	2.72727	1.08485
	1439	2.19561	0.235316		1439	1.59542	0.507424		1439	2.46219	1.29691
	1440	1.9968	0.215435		1440	1.36072	0.838771		1440	2.54172	1.37644
	1441	1.63895	0.513648		1441	0.987954	1.14251		1441	2.67426	1.03184
	1442	1.10217	0.911264		1442	0.68422	1.18392		1442	2.8333	0.660729
	1443	0.346694	1.16972		1443	0.408097	1.3496		1443	2.78029	0.687236
	1444	-0.130446	1.50769		1444	0.228618	1.15631		1444	2.59473	0.687236
	1445	-0.0509227	1.7065		1445	0.32526	0.866383		1445	2.51521	0.872791
	1446	0.386455	1.64685		1446	0.68422	0.383169		1446	2.59473	1.00533
	1447	0.784072	1.30888		1447	1.07079	0.134659		1447	2.67426	0.872791
	1448	1.32085	1.1896		1448	1.37453	-0.100045		1448	2.96584	0.76676
	1449	2.07633	1.03055		1449	1.58162	-0.279524		1449	3.1514	0.76676
	1450	2.45406	0.81186		1450	1.51259	-0.100045		1450	3.20441	0.952314
	1451	2.17573	0.712456		1451	1.33311	0.383169		1451	2.99235	1.32342
	1452	1.65883	0.851622		1452	0.987954	0.963026		1452	2.67426	1.37644
	1453	1.20157	1.01067		1453	0.822281	1.22534		1453	2.4887	1.21739
	1454	0.50574	1.01067		1454	0.601383	1.51527		1454	2.59473	0.846283
	1455	-0.110565	1.16972		1455	0.477128	1.5705		1455	2.62124	0.581205
	1456	-0.170208	1.50769		1456	0.435709	1.33579		1456	2.75378	0.554698
	1457	0.326813	1.64685		1457	0.573771	0.590261		1457	2.93933	0.819775
	1458	0.803953	1.62697		1458	0.849893	0.176078		1458	2.88632	1.00533
	1459	1.3805	1.60709		1459	1.07079	-0.182881		1459	2.96584	0.952314
	1460	2.09621	1.50769		1460	1.3193	-0.307136		1460	3.23092	0.978822
	1461	2.5137	1.22936		1461	1.42975	-0.279524		1461	3.12489	0.872791
	1462	2.15585	0.871503		1462	1.48497	0.314139		1462	2.99235	0.899298
	1463	1.49978	0.672694		1463	1.36072	1.03206		1463	2.93933	1.2439
	1464	0.923238	0.613052		1464	1.18124	1.47385		1464	2.59473	1.37644
	1465	0.386455	0.533529		1465	0.946536	1.66714		1465	2.62124	1.2439
	1466	-0.0509227	0.752218		1466	0.780862	1.63953		1466	2.72727	0.952314
	1467	-0.0906844	1.12995		1467	0.587577	1.25295		1467	2.64775	0.554698
	1468	0.465979	1.64685		1468	0.587577	0.562649		1468	2.88632	0.342636
	1469	1.12205	1.88542		1469	0.698026	-0.0310141		1469	3.01886	0.607713
	1470	1.65883	1.88542		1470	0.918924	-0.459004		1470	3.1514	0.952314
	1471	2.01668	1.84566		1471	1.12602	-0.624677		1471	3.25743	1.32342
	1472	2.21549	1.52757		1472	1.29169	-0.431392		1472	3.20441	1.27041
	1473	2.01668	1.12995		1473	1.47117	0.231302		1473	2.96584	1.03184
	1474	1.4799	0.692575		1474	1.45736	0.963026		1474	2.88632	1.05834
	1475	0.903357	0.513648		1475	1.36072	1.52908		1475	2.67426	1.00533
	1476	0.545502	0.513648		1476	1.11221	1.87423		1476	2.56823	0.978822
	1477	0.24729	0.672694		1477	0.877505	1.90184		1477	2.96584	1.03184
	1478	0.167766	1.09019		1478	0.587577	1.51527		1478	2.93933	0.872791
	1479	0.446098	1.7065		1479	0.477128	0.866383		1479	2.88632	0.740252
	1480	0.962999	2.12399		1480	0.532352	0.286527		1480	3.12489	0.660729
	1481	1.34074	2.20352		1481	0.877505	-0.210494		1481	2.91283	0.793267
	1482	1.51966	2.06435		1482	1.19505	-0.445198		1482	3.01886	1.05834
	1483	1.73835	1.7065		1483	1.56781	-0.29333		1483	3.38997	1.32342
	1484	1.77811	1.16972		1484	1.70587	0.286527		1484	3.28393	1.34993
	1485	1.51966	0.454005		1485	1.80251	0.907802		1485	3.07187	1.19088
	1486	1.16181	0.155793		1486	1.67826	1.46005		1486	2.85981	0.925806
	1487	0.943119	0.215435		1487	1.34691	1.73617		1487	2.67426	0.952314
	1488	0.823834	0.533529		1488	0.93273	1.86042		1488	2.78029	1.08485
	1489	0.644906	0.931145		1489	0.587577	1.40482		1489	2.93933	1.13787
	1490	0.704549	1.56733		1490	0.421903	0.783547		1490	3.09838	0.952314
	1491	0.98288	2.2234		1491	0.32526	-0.00340191		1491	3.1779	0.819775
	1492	1.24133	2.44209		1492	0.421903	-0.417585		1492	3.25743	0.660729
	1493	1.40038	2.20352		1493	0.808475	-0.666096		1493	3.25743	0.872791
	1494	1.59919	1.74626		1494	1.29169	-0.459004		1494	3.36346	1.21739
	1495	1.79799	1.1896		1495	1.67826	0.0518226		1495	3.25743	1.29691
	1496	1.71847	0.493767		1496	1.89916	0.852577		1496	3.1779	1.42945
	1497	1.44014	0.0762697		1497	1.91296	1.41863		1497	3.01886	1.13787
	1498	1.26121	0.195555		1498	1.66445	1.79139		1498	2.8068	1.05834
	1499	1.14193	0.57329		1499	1.11221	1.83281		1499	2.93933	1.19088
	1500	0.903357	1.07031		1500	0.628995	1.61191		1500	3.09838	1.08485
	1501	0.644906	1.68662		1501	0.352873	1.01825		1501	3.20441	1.05834
	1502	0.644906	2.38245		1502	0.380485	0.355557		1502	3.31044	1.08485
	1503	0.803953	2.48185		1503	0.518546	-0.00340191		1503	3.20441	0.925806
	1504	1.00276	2.16376		1504	0.93273	-0.127657		1504	3.28393	1.03184
	1505	1.32085	1.68662		1505	1.45736	-0.0586264		1505	3.36346	1.11136
	1506	1.69859	1.24924		1506	1.95438	0.217496		1506	3.1779	1.19088
	1507	1.9968	0.613052		1507	2.12006	0.742128		1507	3.07187	1.42945
	1508	1.9968	0.235316		1508	2.00961	1.17012		1508	2.99235	1.40295
	1509	1.8974	0.294959		1509	1.69207	1.30818		1509	2.88632	1.32342
	1510	1.67871	0.81186		1510	1.0984	1.32199		1510	3.04536	1.05834
	1511	1.22145	1.289		1511	0.546158	1.25295		1511	3.07187	0.899298
	1512	0.724429	1.8059		1512	0.228618	1.00444		1512	2.99235	0.846283
	1513	0.406336	2.16376		1513	0.270036	0.479812		1513	3.01886	1.00533
	1514	0.386455	2.3228		1514	0.421903	0.134659		1514	3.01886	1.11136
	1515	0.605145	2.06435		1515	0.808475	-0.0448203		1515	3.07187	1.03184
	1516	0.962999	1.66674		1516	1.30549	-0.0448203		1516	3.36346	1.13787
	1517	1.49978	1.16972		1517	1.83013	0.0242103		1517	3.496	1.00533
	1518	1.93716	0.752218		1518	1.92677	0.369363		1518	3.1514	1.05834
	1519	2.17573	0.414244		1519	1.84393	0.797353		1519	2.99235	1.34993
	1520	2.05644	0.414244		1520	1.48497	1.07348		1520	2.91283	1.29691
	1521	1.65883	0.752218		1521	1.12602	1.28057		1521	2.8333	1.27041
	1522	1.0624	1.16972		1522	0.711832	1.41863		1522	2.99235	1.2439
	1523	0.426217	1.42817		1523	0.477128	1.39102		1523	2.88632	0.819775
	1524	0.0286006	1.62697		1524	0.449516	1.03206		1524	2.8333	0.634221
	1525	0.0484814	1.74626		1525	0.656607	0.604067		1525	2.93933	0.740252
	1526	0.48586	1.74626		1526	0.987954	0.327945		1526	2.88632	0.899298
	1527	1.00276	1.46793		1527	1.33311	-0.017208		1527	3.12489	1.16438
	1528	1.61907	1.20948		1528	1.59542	-0.210494		1528	3.46949	1.05834
	1529	2.23537	1.05043		1529	1.78871	-0.0862386		1529	3.28393	1.05834
	1530	2.61311	0.891384		1530	1.67826	0.369363		1530	2.8333	1.05834
	1531	2.3149	0.831741		1531	1.40214	0.811159		1531	2.67426	1.03184
	1532	1.63895	0.931145		1532	1.02937	1.11489		1532	2.51521	1.2439
	1533	0.962999	1.1896		1533	0.75325	1.3496		1533	2.75378	1.2439
	1534	0.346694	1.30888		1534	0.449516	1.40482		1534	3.09838	0.899298
	1535	-0.0708035	1.3884		1535	0.339067	1.15631		1535	3.20441	0.713744
	1536	-0.0509227	1.56733		1536	0.518546	0.866383		1536	2.99235	0.581205
	1537	0.545502	1.8059		1537	0.836087	0.438394		1537	2.72727	0.581205
	1538	1.16181	1.82578		1538	1.0846	0.162271		1538	2.75378	0.978822
	1539	1.71847	1.68662		1539	1.34691	-0.169075		1539	3.09838	1.11136
	1540	2.17573	1.52757		1540	1.58162	-0.0586264		1540	3.38997	1.11136
	1541	2.39442	1.30888		1541	1.67826	0.20369		1541	3.31044	1.19088
	1542	2.05644	0.990788		1542	1.51259	0.755935		1542	2.78029	1.16438
	1543	1.46002	0.712456		1543	1.34691	1.15631		1543	2.38267	1.05834
	1544	0.943119	0.613052		1544	1.0984	1.51527		1544	2.40918	0.952314
	1545	0.585264	0.672694		1545	0.877505	1.63953		1545	2.62124	0.899298
	1546	0.227409	0.851622		1546	0.670413	1.54288		1546	2.85981	0.793267
	1547	0.187647	1.24924		1547	0.656607	1.03206		1547	2.99235	0.740252
	1548	0.625025	1.74626		1548	0.794668	0.424588		1548	2.96584	0.872791
	1549	1.28109	1.98483		1549	0.974148	-0.113851		1549	2.8068	0.899298
	1550	1.83776	1.86554		1550	1.20885	-0.417585		1550	2.93933	0.978822
	1551	2.13597	1.64685		1551	1.37453	-0.500422		1551	3.1514	1.11136
	1552	2.25525	1.3884		1552	1.52639	-0.141463		1552	3.23092	0.978822
	1553	1.9968	1.03055		1553	1.51259	0.466006		1553	3.28393	1.19088
	1554	1.4799	0.652814		1554	1.40214	1.1287		1554	2.8333	1.34993
	1555	0.883476	0.513648		1555	1.15363	1.54288		1555	2.43569	1.13787
	1556	0.48586	0.652814		1556	0.918924	1.91565		1556	2.38267	1.05834
	1557	0.227409	0.891384		1557	0.642801	1.83281		1557	2.4887	0.687236
	1558	0.26717	1.22936		1558	0.518546	1.39102		1558	2.8068	0.607713
	1559	0.605145	1.72638		1559	0.490934	0.645486		1559	3.25743	0.713744
	1560	1.08228	2.12399		1560	0.642801	0.107047		1560	3.36346	0.819775
	1561	1.51966	2.18364		1561	0.891311	-0.307136		1561	3.1779	0.952314
	1562	1.79799	1.90531		1562	1.26408	-0.445198		1562	2.91283	0.978822
	1563	1.91728	1.52757		1563	1.58162	-0.169075		1563	2.4887	1.19088
	1564	1.73835	1.05043		1564	1.58162	0.548843		1564	2.62124	1.2439
	1565	1.42026	0.454005		1565	1.58162	1.22534		1565	2.88632	1.21739
	1566	1.0624	0.116031		1566	1.47117	1.73617		1566	2.8068	1.19088
	1567	0.843714	0.195555		1567	1.34691	1.92945		1567	2.67426	1.00533
	1568	0.644906	0.493767		1568	0.808475	1.86042		1568	2.54172	0.607713
	1569	0.625025	0.911264		1569	0.546158	1.21154		1569	2.40918	0.501682
	1570	0.764191	1.58721		1570	0.421903	0.424588		1570	2.75378	0.713744
	1571	1.04252	2.38245		1571	0.532352	-0.251912		1571	3.20441	0.952314
	1572	1.32085	2.56137		1572	0.518546	-0.569453		1572	3.20441	1.11136
	1573	1.51966	2.14388		1573	0.905117	-0.666096		1573	3.09838	1.08485
	1574	1.67871	1.64685		1574	1.36072	-0.320943		1574	2.78029	1.03184
	1575	1.77811	1.14983		1575	1.74729	0.355557		1575	2.59473	0.925806
	1576	1.69859	0.473886		1576	1.73348	1.07348		1576	2.67426	0.978822
	1577	1.36062	-0.0231345		1577	1.65065	1.5705		1577	2.70076	1.16438
	1578	1.14193	0.116031		1578	1.38833	1.79139		1578	2.54172	1.11136
	1579	1.02264	0.632933		1579	0.863699	1.74997		1579	2.62124	0.846283
	1580	0.883476	1.07031		1580	0.32526	1.29437		1580	2.75378	0.660729
	1581	0.565383	1.72638		1581	0.173393	0.673098		1581	2.72727	0.687236
	1582	0.545502	2.42221		1582	0.339067	0.162271		1582	2.8068	0.872791
	1583	0.784072	2.62102		1583	0.518546	-0.100045		1583	2.78029	0.925806
	1584	1.04252	2.08423		1584	0.891311	-0.155269		1584	2.85981	1.08485
	1585	1.28109	1.42817		1585	1.47117	0.0518226		1585	2.91283	1.08485
	1586	1.67871	0.970907		1586	1.98199	0.4522		1586	2.8068	0.925806
	1587	2.01668	0.414244		1587	1.94058	0.990638		1587	2.72727	0.978822
	1588	1.8974	0.0563888		1588	1.67826	1.37721		1588	2.64775	1.03184
	1589	1.63895	0.235316		1589	1.36072	1.5705		1589	2.40918	1.03184
	1590	1.42026	0.851622		1590	0.849893	1.39102		1590	2.46219	1.03184
	1591	1.02264	1.34864		1591	0.32526	1.08728		1591	2.56823	0.925806
	1592	0.525621	1.76614		1592	0.145781	0.742128		1592	2.75378	0.660729
	1593	0.227409	2.2234		1593	0.32526	0.341751		1593	3.01886	0.52819
	1594	0.48586	2.34268		1594	0.573771	-0.0862386		1594	3.01886	0.448667
	1595	0.684668	1.86554		1595	0.836087	-0.196688		1595	2.96584	0.76676
	1596	1.02264	1.1896		1596	1.38833	-0.0310141		1596	2.72727	1.08485
	1597	1.51966	0.871503		1597	1.84393	0.245108		1597	2.54172	1.19088
	1598	2.03656	0.613052		1598	1.88535	0.466006		1598	2.64775	1.16438
	1599	2.05644	0.394363		1599	1.63684	0.990638		1599	2.88632	0.952314
	1600	1.71847	0.414244		1600	1.3193	1.32199		1600	2.75378	0.740252
	1601	1.3805	0.871503		1601	0.987954	1.41863		1601	2.56823	0.819775
	1602	0.823834	1.24924		1602	0.490934	1.19773		1602	2.51521	0.846283
	1603	0.167766	1.32876		1603	0.201005	1.22534		1603	2.51521	0.872791
	1604	-0.170208	1.54745		1604	0.283842	0.893996		1604	2.67426	0.740252
	1605	0.167766	1.8059		1605	0.601383	0.479812		1605	2.8333	0.660729
	1606	0.605145	1.74626		1606	0.974148	0.0932409		1606	2.93933	0.819775
	1607	1.02264	1.3884		1607	1.36072	0.107047		1607	2.91283	0.952314
	1608	1.65883	1.16972		1608	1.67826	0.0932409		1608	2.78029	0.978822
	1609	2.35466	1.11007		1609	1.78871	0.217496		1609	2.72727	1.11136
	1610	2.53358	0.831741		1610	1.49878	0.604067		1610	2.67426	1.03184
	1611	2.07633	0.672694		1611	1.19505	1.07348		1611	2.70076	1.03184
	1612	1.51966	0.871503		1612	0.794668	1.29437		1612	2.70076	1.00533
	1613	0.962999	1.1896		1613	0.490934	1.3496		1613	2.59473	0.846283
	1614	0.287051	1.26912		1614	0.173393	1.29437		1614	2.56823	0.740252
	1615	-0.150327	1.40828		1615	0.242424	1.05967		1615	2.51521	0.687236
	1616	0.0683622	1.72638		1616	0.532352	0.604067		1616	2.67426	0.687236
	1617	0.664787	1.82578		1617	0.93273	0.258914		1617	2.96584	0.713744
	1618	1.12205	1.54745		1618	1.20885	-0.0862386		1618	2.93933	0.76676
	1619	1.5793	1.36852		1619	1.51259	-0.155269		1619	3.01886	0.872791
	1620	2.15585	1.30888		1620	1.67826	0.0380164		1620	2.93933	1.16438
	1621	2.33478	1.12995		1621	1.65065	0.562649		1621	2.62124	1.16438
	1622	1.81787	0.752218		1622	1.42975	0.94922		1622	2.56823	1.16438
	1623	1.10217	0.632933		1623	1.18124	1.32199		1623	2.38267	1.08485
	1624	0.704549	0.772099		1624	0.891311	1.50146		1624	2.38267	0.846283
	1625	0.386455	0.81186		1625	0.642801	1.61191		1625	2.67426	0.713744
	1626	-0.0509227	0.951026		1626	0.546158	1.21154		1626	2.64775	0.660729
	1627	-0.0310419	1.32876		1627	0.642801	0.866383		1627	2.70076	0.687236
	1628	0.605145	1.74626		1628	0.780862	0.355557		1628	2.8068	0.872791
	1629	1.34074	1.8059		1629	1.02937	-0.0586264		1629	2.72727	1.03184
	1630	1.83776	1.7065		1630	1.29169	-0.445198		1630	2.88632	1.05834
	1631	2.15585	1.68662		1631	1.51259	-0.279524		1631	2.8333	1.08485
	1632	2.4143	1.44805		1632	1.48497	0.0932409		1632	2.67426	1.00533
	1633	2.05644	0.931145		1633	1.36072	0.590261		1633	2.64775	0.978822
	1634	1.34074	0.533529		1634	1.19505	1.04586		1634	2.40918	1.03184
	1635	0.803953	0.493767		1635	1.01557	1.70856		1635	2.30315	1.03184
	1636	0.525621	0.593171		1636	0.711832	1.91565		1636	2.4887	0.899298
	1637	0.128005	0.81186		1637	0.477128	1.61191		1637	2.64775	0.713744
	1638	0.0286006	1.32876		1638	0.463322	1.00444		1638	2.78029	0.501682
	1639	0.545502	1.86554		1639	0.559964	0.466006		1639	2.91283	0.475174
	1640	1.32085	2.14388		1640	0.739444	-0.182881		1640	2.88632	0.819775
	1641	1.63895	2.10411		1641	0.987954	-0.638483		1641	2.67426	1.11136
	1642	1.81787	1.94507		1642	1.38833	-0.555647		1642	2.64775	1.32342
	1643	2.01668	1.52757		1643	1.59542	0.0656287		1643	2.72727	1.16438
	1644	1.87752	0.891384		1644	1.60923	0.659292		1644	2.64775	1.03184
	1645	1.22145	0.294959		1645	1.58162	1.32199		1645	2.59473	0.872791
	1646	0.74431	0.0762697		1646	1.5402	1.86042		1646	2.40918	0.740252
	1647	0.585264	0.195555		1647	1.19505	2.0261		1647	2.30315	0.899298
	1648	0.465979	0.513648		1648	0.767056	1.5705		1648	2.43569	1.00533
	1649	0.406336	1.05043		1649	0.546158	0.94922		1649	2.51521	0.740252
	1650	0.724429	1.68662		1650	0.546158	0.327945		1650	2.64775	0.634221
	1651	1.22145	2.26316		1651	0.532352	-0.320943		1651	2.93933	0.634221
	1652	1.3805	2.34268		1652	0.698026	-0.72132		1652	2.99235	0.634221
	1653	1.3805	2.00471		1653	1.12602	-0.638483		1653	2.96584	0.978822
	1654	1.53954	1.52757		1654	1.52639	-0.0724325		1654	2.72727	1.29691
	1655	1.61907	0.931145		1655	1.59542	0.659292		1655	2.38267	1.19088
	1656	1.40038	0.394363		1656	1.56781	1.39102		1656	2.30315	0.978822
	1657	1.10217	0.0762697		1657	1.44356	1.91565		1657	2.25013	0.740252
	1658	1.08228	0.235316		1658	1.13982	1.88804		1658	2.46219	0.581205
	1659	1.04252	0.672694		1659	0.559964	1.52908		1659	2.67426	0.713744
	1660	0.823834	1.20948		1660	0.214812	0.921608		1660	2.70076	0.713744
	1661	0.565383	1.82578		1661	0.187199	0.314139		1661	2.64775	0.76676
	1662	0.625025	2.30292		1662	0.311454	-0.210494		1662	2.67426	0.819775
	1663	0.704549	2.30292		1663	0.628995	-0.431392		1663	2.75378	0.713744
	1664	0.843714	1.86554		1664	1.13982	-0.29333		1664	2.8333	0.793267
	1665	1.14193	1.32876		1665	1.7749	0.0794348		1665	2.78029	1.08485
	1666	1.63895	0.791979		1666	1.9958	0.673098		1666	2.70076	1.05834
	1667	1.83776	0.235316		1667	1.83013	1.18392		1667	2.22362	1.08485
	1668	1.59919	-0.0628961		1668	1.554	1.44624		1668	2.25013	0.846283
	1669	1.40038	0.175674		1669	1.22266	1.50146		1669	2.40918	0.740252
	1670	1.30097	0.712456		1670	0.711832	1.40482		1670	2.54172	0.740252
	1671	0.98288	1.289		1671	0.25623	1.10109		1671	2.8068	0.740252
	1672	0.446098	1.76614		1672	0.104363	0.535037		1672	2.93933	0.76676
	1673	0.227409	2.18364		1673	0.366679	0.0932409		1673	2.75378	0.687236
	1674	0.48586	2.18364		1674	0.711832	-0.182881		1674	2.51521	0.76676
	1675	0.764191	1.78602		1675	1.13982	-0.307136		1675	2.51521	0.978822
	1676	1.12205	1.26912		1676	1.65065	-0.196688		1676	2.67426	1.00533
	1677	1.61907	0.911264		1677	1.91296	0.341751		1677	2.75378	1.08485
	1678	2.01668	0.613052		1678	1.81632	0.935414		1678	2.70076	1.08485
	1679	1.95704	0.394363		1679	1.38833	1.28057		1679	2.54172	1.08485
	1680	1.5793	0.454005		1680	0.946536	1.30818		1680	2.27664	0.872791
	1681	1.26121	0.831741		1681	0.559964	1.3634		1681	2.22362	0.634221
	1682	0.704549	1.24924		1682	0.242424	1.11489		1682	2.46219	0.660729
	1683	0.108124	1.50769		1683	0.187199	0.769741		1683	2.62124	0.846283
	1684	-0.0708035	1.74626		1684	0.366679	0.369363		1684	2.85981	0.925806
	1685	0.346694	1.88542		1685	0.780862	0.27272		1685	2.93933	0.819775
	1686	0.784072	1.64685		1686	1.16743	0.0932409		1686	2.88632	0.793267
	1687	1.14193	1.289		1687	1.56781	0.0380164		1687	2.70076	0.846283
	1688	1.67871	0.970907		1688	1.78871	0.231302		1688	2.59473	1.00533
	1689	2.25525	0.831741		1689	1.78871	0.645486		1689	2.40918	1.21739
	1690	2.37454	0.672694		1690	1.42975	0.88019		1690	2.46219	1.2439
	1691	1.9968	0.613052		1691	1.04318	1.11489		1691	2.56823	1.13787
	1692	1.51966	0.851622		1692	0.628995	1.29437		1692	2.56823	0.846283
	1693	0.962999	1.07031		1693	0.380485	1.29437		1693	2.54172	0.607713
	1694	0.287051	1.26912		1694	0.214812	0.88019		1694	2.56823	0.554698
	1695	-0.130446	1.44805		1695	0.380485	0.576455		1695	2.67426	0.607713
	1696	-0.0111611	1.7065		1696	0.68422	0.341751		1696	2.8333	0.740252
	1697	0.326813	1.74626		1697	1.04318	0.0794348		1697	2.85981	1.03184
	1698	0.883476	1.56733		1698	1.38833	-0.182881		1698	2.70076	1.08485
	1699	1.55942	1.34864		1699	1.65065	0.0242103		1699	2.59473	1.05834
	1700	2.25525	1.14983		1700	1.69207	0.355557		1700	2.54172	1.05834
	1701	2.29501	0.911264		1701	1.47117	0.714516		1701	2.46219	0.978822
	1702	1.81787	0.652814		1702	1.22266	0.976832		1702	2.51521	0.899298
	1703	1.10217	0.593171		1703	0.905117	1.44624		1703	2.56823	0.846283
	1704	0.545502	0.672694		1704	0.587577	1.51527		1704	2.38267	0.660729
	1705	-0.0111611	0.772099		1705	0.394291	1.39102		1705	2.43569	0.793267
	1706	-0.249731	0.970907		1706	0.532352	1.01825		1706	2.54172	0.846283
	1707	-0.0906844	1.30888		1707	0.767056	0.686904		1707	2.64775	0.76676
	1708	0.545502	1.58721		1708	0.960342	0.0656287		1708	2.8068	0.634221
	1709	1.32085	1.58721		1709	1.16743	-0.320943		1709	2.72727	0.687236
	1710	1.93716	1.58721		1710	1.40214	-0.431392		1710	2.59473	0.872791
	1711	2.29501	1.58721		1711	1.45736	-0.0862386		1711	2.62124	1.13787
	1712	2.29501	1.32876		1712	1.33311	0.27272		1712	2.54172	1.27041
	1713	1.95704	0.752218		1713	1.0984	0.893996		1713	2.4887	1.13787
	1714	1.26121	0.394363		1714	0.946536	1.33579		1714	2.46219	0.76676
	1715	0.605145	0.454005		1715	0.698026	1.68094		1715	2.25013	0.395651
	1716	0.287051	0.57329		1716	0.477128	1.54288		1716	2.35616	0.342636
	1717	0.207528	0.772099		1717	0.380485	1.28057		1717	2.56823	0.554698
	1718	0.346694	1.26912		1718	0.477128	0.590261		1718	2.72727	0.872791
	1719	0.784072	1.84566		1719	0.670413	0.0104042		1719	2.91283	0.872791
	1720	1.30097	2.04447		1720	0.863699	-0.514228		1720	2.8333	0.687236
	1721	1.63895	2.02459		1721	1.13982	-0.528034		1721	2.72727	0.687236
	1722	1.65883	1.92519		1722	1.41594	-0.334749		1722	2.62124	1.00533
	1723	1.71847	1.54745		1723	1.52639	0.231302		1723	2.35616	1.13787
	1724	1.59919	0.752218		1724	1.42975	0.824965		1724	2.38267	1.05834
	1725	1.20157	0.116031		1725	1.34691	1.44624		1725	2.38267	0.952314
	1726	0.724429	-0.00325364		1726	1.19505	1.81901		1726	2.30315	0.660729
	1727	0.426217	0.195555		1727	0.918924	1.91565		1727	2.40918	0.52819
	1728	0.326813	0.533529		1728	0.546158	1.47385		1728	2.4887	0.554698
	1729	0.386455	1.09019		1729	0.408097	0.755935		1729	2.59473	0.660729
	1730	0.74431	1.78602		1730	0.408097	-0.017208		1730	2.75378	0.793267
	1731	1.16181	2.2234		1731	0.532352	-0.514228		1731	2.96584	0.819775
	1732	1.40038	2.24328		1732	0.780862	-0.707514		1732	2.91283	0.978822
	1733	1.51966	1.96495		1733	1.25027	-0.486616		1733	2.67426	1.13787
	1734	1.67871	1.44805		1734	1.5402	0.120853		1734	2.43569	1.03184
	1735	1.73835	0.772099		1735	1.554	0.824965		1735	2.27664	0.978822
	1736	1.51966	0.215435		1736	1.40214	1.44624		1736	2.27664	0.846283
	1737	1.22145	0.0563888		1737	1.13982	1.72236		1737	2.43569	0.76676
	1738	0.98288	0.215435		1738	0.75325	1.72236		1738	2.46219	0.634221
	1739	0.803953	0.553409		1739	0.311454	1.29437		1739	2.64775	0.554698
	1740	0.605145	1.09019		1740	0.131975	0.686904		1740	2.78029	0.660729
	1741	0.605145	1.82578		1741	0.311454	0.107047		1741	2.64775	0.819775
	1742	0.704549	2.28304		1742	0.559964	-0.279524		1742	2.67426	0.899298
	1743	0.903357	2.26316		1743	0.93273	-0.486616		1743	2.70076	0.899298
	1744	1.08228	1.8059		1744	1.26408	-0.348555		1744	2.62124	0.952314
	1745	1.40038	1.32876		1745	1.70587	0.148465		1745	2.67426	1.03184
	1746	1.55942	0.712456		1746	1.87155	0.852577		1746	2.54172	0.978822
	1747	1.51966	0.155793		1747	1.7749	1.3634		1747	2.30315	1.05834
	1748	1.44014	-0.0430153		1748	1.41594	1.61191		1748	2.11759	0.899298
	1749	1.40038	0.195555		1749	0.974148	1.65333		1749	2.19712	0.846283
	1750	1.26121	0.712456		1750	0.449516	1.32199		1750	2.4887	0.819775
	1751	0.843714	1.1896		1751	0.104363	0.866383		1751	2.8068	0.713744
	1752	0.48586	1.8059		1752	0.145781	0.258914		1752	2.99235	0.687236
	1753	0.386455	2.24328		1753	0.449516	-0.113851		1753	2.8333	0.687236
	1754	0.525621	2.24328		1754	0.849893	-0.417585		1754	2.59473	0.713744
	1755	0.823834	1.8059		1755	1.16743	-0.251912		1755	2.54172	0.978822
	1756	1.28109	1.26912		1756	1.63684	0.134659		1756	2.4887	1.13787
	1757	1.71847	0.871503		1757	1.74729	0.686904		1757	2.59473	1.2439
	1758	1.91728	0.394363		1758	1.62304	1.04586		1758	2.4887	1.08485
	1759	1.87752	0.155793		1759	1.19505	1.37721		1759	2.32966	0.846283
	1760	1.59919	0.31484		1760	0.808475	1.46005		1760	2.19712	0.554698
	1761	1.08228	0.831741		1761	0.408097	1.29437		1761	2.32966	0.369143
	1762	0.406336	1.20948		1762	0.131975	0.935414		1762	2.72727	0.501682
	1763	-0.0310419	1.52757		1763	0.118169	0.548843		1763	2.93933	0.740252
	1764	-0.0906844	1.88542		1764	0.408097	0.189884		1764	2.85981	0.819775
	1765	0.227409	1.96495		1765	0.849893	-0.100045		1765	2.67426	0.925806
	1766	0.684668	1.56733		1766	1.33311	-0.100045		1766	2.35616	1.05834
	1767	1.26121	1.07031		1767	1.74729	0.0932409		1767	2.35616	1.00533
	1768	1.75823	0.851622		1768	1.89916	0.438394		1768	2.4887	0.899298
	1769	2.13597	0.652814		1769	1.78871	0.755935		1769	2.59473	0.846283
	1770	2.11609	0.394363		1770	1.38833	1.07348		1770	2.64775	0.846283
	1771	1.75823	0.434125		1771	0.987954	1.25295		1771	2.4887	0.740252
	1772	1.22145	0.871503		1772	0.50474	1.28057		1772	2.27664	0.899298
	1773	0.625025	1.14983		1773	0.25623	1.05967		1773	2.35616	0.819775
	1774	0.0484814	1.20948		1774	0.159587	0.70071		1774	2.59473	0.581205
	1775	-0.190088	1.42817		1775	0.463322	0.383169		1775	2.75378	0.501682
	1776	0.0882431	1.8059		1776	0.767056	0.189884		1776	2.91283	0.607713
	1777	0.644906	1.78602		1777	1.11221	0.0104042		1777	2.8068	0.740252
	1778	1.20157	1.46793		1778	1.45736	-0.127657		1778	2.46219	0.952314
	1779	1.83776	1.26912		1779	1.62304	0.176078		1779	2.32966	1.03184
	1780	2.29501	1.24924		1780	1.5402	0.479812		1780	2.35616	1.05834
	1781	2.25525	0.970907		1781	1.18124	0.907802		1781	2.40918	1.03184
	1782	1.67871	0.632933		1782	0.93273	1.05967		1782	2.40918	0.899298
	1783	1.02264	0.593171		1783	0.573771	1.52908		1783	2.27664	0.634221
	1784	0.366575	0.791979		1784	0.32526	1.41863		1784	2.25013	0.52819
	1785	-0.170208	0.871503		1785	0.228618	1.17012		1785	2.43569	0.581205
	1786	-0.369016	1.01067		1786	0.490934	0.686904		1786	2.67426	0.607713
	1787	0.0286006	1.40828		1787	0.794668	0.562649		1787	2.67426	0.740252
	1788	0.664787	1.74626		1788	1.05698	0.0380164		1788	2.67426	0.872791
	1789	1.3805	1.66674		1789	1.38833	-0.307136		1789	2.72727	0.978822
	1790	1.9968	1.44805		1790	1.52639	-0.307136		1790	2.54172	0.978822
	1791	2.39442	1.40828		1791	1.48497	0.258914		1791	2.38267	1.03184
	1792	2.3149	1.20948		1792	1.22266	0.645486		1792	2.30315	0.925806
	1793	1.73835	0.672694		1793	1.04318	1.01825		1793	2.25013	0.872791
	1794	1.0624	0.31484		1794	0.808475	1.43243		1794	2.40918	0.740252
	1795	0.465979	0.414244		1795	0.559964	1.63953		1795	2.56823	0.660729
	1796	0.0484814	0.593171		1796	0.421903	1.39102		1796	2.4887	0.581205
	1797	-0.0708035	0.772099		1797	0.435709	0.893996		1797	2.51521	0.501682
	1798	0.227409	1.26912		1798	0.50474	0.4522		1798	2.51521	0.660729
	1799	0.764191	1.82578		1799	0.656607	-0.0724325		1799	2.59473	0.978822
	1800	1.30097	1.98483		1800	0.946536	-0.528034		1800	2.8333	1.16438
	1801	1.61907	1.78602		1801	1.29169	-0.583259		1801	2.85981	1.19088
	1802	1.87752	1.68662		1802	1.42975	-0.127657		1802	2.64775	0.978822
	1803	1.81787	1.3884		1803	1.38833	0.4522		1803	2.38267	0.793267
	1804	1.42026	0.672694		1804	1.29169	1.08728		1804	2.25013	0.793267
	1805	0.923238	0.155793		1805	1.12602	1.62572		1805	2.19712	0.899298
	1806	0.545502	0.175674		1806	0.863699	1.97087		1806	2.27664	0.846283
	1807	0.406336	0.394363		1807	0.615189	1.72236		1807	2.46219	0.660729
	1808	0.207528	0.553409		1808	0.477128	1.17012		1808	2.54172	0.607713
	1809	0.326813	1.03055		1809	0.490934	0.493618		1809	2.8068	0.713744
	1810	0.704549	1.88542		1810	0.518546	-0.100045		1810	2.96584	0.713744
	1811	1.12205	2.34268		1811	0.794668	-0.555647		1811	2.91283	0.793267
	1812	1.32085	2.18364		1812	1.18124	-0.638483		1812	2.56823	1.00533
	1813	1.53954	1.8059		1813	1.52639	-0.265718		1813	2.40918	1.05834
	1814	1.73835	1.3884		1814	1.56781	0.327945		1814	2.22362	1.05834
	1815	1.67871	0.632933		1815	1.47117	0.990638		1815	2.30315	0.978822
	1816	1.32085	-0.0430153		1816	1.30549	1.5705		1816	2.40918	0.76676
	1817	1.04252	-0.142419		1817	1.02937	1.86042		1817	2.4887	0.687236
	1818	0.923238	0.294959		1818	0.670413	1.72236		1818	2.40918	0.501682
	1819	0.724429	0.692575		1819	0.352873	1.17012		1819	2.43569	0.52819
	1820	0.585264	1.24924		1820	0.228618	0.493618		1820	2.64775	0.740252
	1821	0.644906	1.98483		1821	0.352873	-0.182881		1821	2.8068	0.872791
	1822	0.863595	2.36256		1822	0.670413	-0.528034		1822	2.75378	0.952314
	1823	0.943119	2.06435		1823	1.07079	-0.638483		1823	2.70076	1.03184
	1824	1.08228	1.54745		1824	1.41594	-0.169075		1824	2.43569	1.11136
	1825	1.44014	1.12995		1825	1.65065	0.466006		1825	2.17061	0.899298
	1826	1.63895	0.533529		1826	1.70587	1.29437		1826	2.17061	0.899298
	1827	1.49978	-0.0231345		1827	1.51259	1.59811		1827	2.17061	0.899298
	1828	1.20157	-0.0430153		1828	1.16743	1.8052		1828	2.32966	0.607713
	1829	1.14193	0.374482		1829	0.75325	1.52908		1829	2.62124	0.687236
	1830	0.943119	0.831741		1830	0.32526	1.1287		1830	2.67426	0.634221
	1831	0.525621	1.20948		1831	0.145781	0.410782		1831	2.59473	0.607713
	1832	0.406336	1.74626		1832	0.201005	-0.017208		1832	2.56823	0.713744
	1833	0.585264	2.08423		1833	0.546158	-0.320943		1833	2.46219	0.899298
	1834	0.784072	1.98483		1834	0.877505	-0.417585		1834	2.56823	0.872791
	1835	0.863595	1.56733		1835	1.27788	-0.279524		1835	2.70076	0.925806
	1836	1.22145	1.22936		1836	1.59542	0.383169		1836	2.59473	0.925806
	1837	1.73835	0.931145		1837	1.66445	0.935414		1837	2.38267	0.793267
	1838	1.8974	0.493767		1838	1.48497	1.30818		1838	2.25013	0.819775
	1839	1.73835	0.215435		1839	1.04318	1.40482		1839	2.09109	0.793267
	1840	1.53954	0.33472		1840	0.628995	1.50146		1840	2.09109	0.793267
	1841	1.16181	0.772099		1841	0.214812	1.15631		1841	2.40918	0.76676
	1842	0.545502	1.11007		1842	0.0767504	0.617873		1842	2.75378	0.581205
	1843	0.0484814	1.3884		1843	0.131975	0.120853		1843	2.93933	0.395651
	1844	-0.0111611	1.74626		1844	0.463322	-0.127657		1844	2.8068	0.660729
	1845	0.24729	1.8059		1845	0.960342	-0.348555		1845	2.51521	0.899298
	1846	0.625025	1.48781		1846	1.51259	-0.210494		1846	2.27664	1.13787
	1847	1.14193	1.07031		1847	1.81632	0.217496		1847	2.22362	1.27041
	1848	1.77811	0.831741		1848	1.84393	0.742128		1848	2.32966	0.925806
	1849	2.13597	0.613052		1849	1.60923	1.01825		1849	2.38267	0.76676
	1850	2.09621	0.33472		1850	1.12602	1.25295		1850	2.4887	0.713744
	1851	1.69859	0.414244		1851	0.532352	1.3634		1851	2.4887	0.634221
	1852	1.08228	0.81186		1852	0.0491382	1.21154		1852	2.35616	0.872791
	1853	0.426217	1.12995		1853	-0.0475047	0.797353		1853	2.38267	0.846283
	1854	-0.170208	1.289		1854	0.0905565	0.438394		1854	2.51521	0.52819
	1855	-0.209969	1.50769		1855	0.421903	0.148465		1855	2.75378	0.581205
	1856	0.227409	1.76614		1856	0.891311	-0.0724325		1856	2.96584	0.76676
	1857	0.903357	1.74626		1857	1.33311	-0.169075		1857	2.72727	0.899298
	1858	1.4799	1.46793		1858	1.58162	0.0104042		1858	2.27664	1.11136
	1859	1.97692	1.30888		1859	1.48497	0.438394		1859	2.27664	1.13787
	1860	2.33478	1.1896		1860	1.33311	0.783547		1860	2.22362	0.925806
	1861	2.13597	0.990788		1861	1.01557	1.11489		1861	2.32966	0.793267
	1862	1.49978	0.81186		1862	0.739444	1.25295		1862	2.67426	0.52819
	1863	0.803953	0.81186		1863	0.352873	1.37721		1863	2.62124	0.448667
	1864	0.326813	0.851622		1864	0.270036	1.22534		1864	2.38267	0.634221
	1865	-0.150327	0.791979		1865	0.352873	0.990638		1865	2.46219	0.793267
	1866	-0.309373	0.951026		1866	0.698026	0.576455		1866	2.51521	0.872791
	1867	0.0484814	1.30888		1867	0.905117	0.258914		1867	2.56823	0.872791
	1868	0.784072	1.56733		1868	1.27788	-0.0724325		1868	2.78029	0.713744
	1869	1.36062	1.48781		1869	1.47117	-0.127657		1869	2.72727	0.740252
	1870	1.87752	1.42817		1870	1.62304	-0.0310141		1870	2.51521	0.952314
	1871	2.27513	1.36852		1871	1.44356	0.383169		1871	2.43569	1.03184
	1872	2.21549	1.09019		1872	1.25027	0.783547		1872	2.25013	1.13787
	1873	1.55942	0.613052		1873	0.974148	1.19773		1873	2.06458	0.925806
	1874	0.823834	0.31484		1874	0.68422	1.3634		1874	2.30315	0.687236
	1875	0.406336	0.33472		1875	0.380485	1.46005		1875	2.51521	0.554698
	1876	0.0882431	0.493767		1876	0.32526	1.22534		1876	2.62124	0.263112
	1877	-0.0708035	0.871503		1877	0.394291	0.797353		1877	2.64775	0.422159
	1878	0.207528	1.42817		1878	0.573771	0.189884		1878	2.56823	0.952314
	1879	0.903357	1.92519		1879	0.780862	-0.196688		1879	2.59473	0.978822
	1880	1.46002	2.08423		1880	1.0846	-0.459004		1880	2.62124	1.13787
	1881	1.85764	2.06435		1881	1.38833	-0.348555		1881	2.43569	1.16438
	1882	2.07633	1.84566		1882	1.47117	0.0380164		1882	2.38267	0.793267
	1883	2.03656	1.3884		1883	1.36072	0.783547		1883	2.25013	0.819775
	1884	1.51966	0.732337		1884	1.12602	1.3496		1884	2.11759	0.819775
	1885	0.962999	0.294959		1885	1.00176	1.77759		1885	2.22362	0.713744
	1886	0.565383	0.135912		1886	0.780862	1.8052		1886	2.38267	0.660729
	1887	0.187647	0.255197		1887	0.642801	1.55669		1887	2.46219	0.581205
	1888	-0.0111611	0.652814		1888	0.532352	0.907802		1888	2.59473	0.554698
	1889	0.306932	1.22936		1889	0.670413	0.258914		1889	2.51521	0.634221
	1890	0.863595	1.76614		1890	0.767056	-0.334749		1890	2.54172	0.899298
	1891	1.22145	1.96495		1891	0.987954	-0.652289		1891	2.51521	1.05834
	1892	1.36062	1.96495		1892	1.25027	-0.624677		1892	2.46219	1.16438
	1893	1.5793	1.72638		1893	1.42975	-0.155269		1893	2.38267	1.05834
	1894	1.61907	1.1896		1894	1.38833	0.507424		1894	2.32966	0.846283
	1895	1.40038	0.553409		1895	1.23646	1.19773		1895	2.25013	0.687236
	1896	1.10217	0.135912		1896	1.13982	1.66714		1896	2.22362	0.581205
	1897	0.943119	0.0563888		1897	0.794668	1.77759		1897	2.30315	0.607713
	1898	0.724429	0.135912		1898	0.490934	1.3496		1898	2.30315	0.740252
	1899	0.545502	0.57329		1899	0.214812	0.852577		1899	2.40918	0.713744
	1900	0.565383	1.30888		1900	0.311454	0.162271		1900	2.67426	0.76676
	1901	0.724429	1.98483		1901	0.421903	-0.362361		1901	2.70076	0.819775
	1902	0.923238	2.18364		1902	0.725638	-0.790351		1902	2.70076	0.793267
	1903	1.08228	2.16376		1903	1.07079	-0.569453		1903	2.59473	0.899298
	1904	1.30097	1.98483		1904	1.38833	-0.100045		1904	2.19712	0.925806
	1905	1.46002	1.30888		1905	1.56781	0.548843		1905	2.06458	0.952314
	1906	1.4799	0.434125		1906	1.5402	1.18392		1906	2.1441	0.978822
	1907	1.34074	0.0166272		1907	1.29169	1.76378		1907	2.1441	0.872791
	1908	1.0624	0.0961505		1908	0.863699	1.84662		1908	2.30315	0.634221
	1909	0.923238	0.255197		1909	0.463322	1.51527		1909	2.51521	0.554698
	1910	0.843714	0.593171		1910	0.187199	0.94922		1910	2.54172	0.28962
	1911	0.684668	1.3884		1911	0.0629443	0.162271		1911	2.59473	0.448667
	1912	0.48586	2.08423		1912	0.228618	-0.334749		1912	2.70076	0.952314
	1913	0.525621	2.14388		1913	0.628995	-0.500422		1913	2.75378	1.13787
	1914	0.863595	1.96495		1914	1.16743	-0.00340191		1914	2.62124	1.13787
	1915	1.16181	1.76614		1915	1.48497	0.576455		1915	2.46219	1.00533
	1916	1.4799	1.34864		1916	1.67826	1.22534		1916	2.32966	0.607713
	1917	1.75823	0.672694		1917	1.59542	1.61191		1917	2.11759	0.687236
	1918	1.83776	0.33472		1918	1.38833	1.68094		1918	2.19712	0.899298
	1919	1.75823	0.354601		1919	0.946536	1.39102		1919	2.43569	0.846283
	1920	1.4799	0.434125		1920	0.477128	0.976832		1920	2.56823	0.793267
	1921	1.10217	0.692575		1921	0.131975	0.4522		1921	2.72727	0.554698
	1922	0.426217	1.26912		1922	0.035332	-0.00340191		1922	2.75378	0.501682
	1923	0.0484814	1.68662		1923	0.270036	-0.210494		1923	2.59473	0.660729
	1924	0.0683622	1.7065		1924	0.698026	-0.2243		1924	2.59473	0.872791
	1925	0.326813	1.56733		1925	1.25027	0.0518226		1925	2.56823	1.11136
	1926	0.644906	1.58721		1926	1.66445	0.466006		1926	2.38267	1.21739
	1927	1.22145	1.24924		1927	1.83013	0.990638		1927	2.32966	0.952314
	1928	1.85764	0.692575		1928	1.73348	1.21154		1928	2.32966	0.581205
	1929	2.13597	0.31484		1929	1.44356	1.3496		1929	2.22362	0.607713
	1930	1.9968	0.374482		1930	0.93273	1.32199		1930	2.30315	0.713744
	1931	1.63895	0.473886		1931	0.421903	1.11489		1931	2.40918	0.713744
	1932	1.04252	0.613052		1932	0.0629443	0.562649		1932	2.54172	0.925806
	1933	0.26717	1.01067		1933	0.035332	0.148465		1933	2.62124	0.819775
	1934	-0.130446	1.44805		1934	0.187199	-0.0724325		1934	2.67426	0.713744
	1935	0.00871976	1.62697		1935	0.601383	-0.155269		1935	2.70076	0.634221
	1936	0.426217	1.60709		1936	1.11221	-0.169075		1936	2.62124	0.634221
	1937	0.883476	1.60709		1937	1.58162	0.20369		1937	2.38267	0.819775
	1938	1.53954	1.52757		1938	1.73348	0.742128		1938	2.19712	1.03184
	1939	2.17573	1.1896		1939	1.62304	1.01825		1939	2.19712	1.16438
	1940	2.3149	0.891384		1940	1.27788	1.19773		1940	2.19712	1.05834
	1941	1.9968	0.772099		1941	0.93273	1.32199		1941	2.38267	0.872791
	1942	1.4799	0.632933		1942	0.532352	1.33579		1942	2.38267	0.554698
	1943	0.803953	0.473886		1943	0.311454	0.907802		1943	2.40918	0.316128
	1944	0.108124	0.493767		1944	0.201005	0.604067		1944	2.51521	0.395651
	1945	-0.289493	0.851622		1945	0.394291	0.341751		1945	2.62124	0.607713
	1946	-0.150327	1.16972		1946	0.68422	0.120853		1946	2.56823	0.872791
	1947	0.167766	1.24924		1947	1.0984	-0.210494		1947	2.62124	1.05834
	1948	0.704549	1.3884		1948	1.45736	-0.0586264		1948	2.51521	1.00533
	1949	1.44014	1.58721		1949	1.67826	0.245108		1949	2.30315	1.00533
	1950	2.07633	1.54745		1950	1.60923	0.70071		1950	2.17061	0.978822
	1951	2.25525	1.20948		1951	1.37453	0.990638		1951	2.06458	0.819775
	1952	1.95704	0.970907		1952	1.0846	1.37721		1952	2.19712	0.687236
	1953	1.4799	0.831741		1953	0.698026	1.37721		1953	2.43569	0.76676
	1954	0.803953	0.493767		1954	0.380485	1.18392		1954	2.56823	0.634221
	1955	0.24729	0.175674		1955	0.201005	0.838771		1955	2.4887	0.52819
	1956	-0.0708035	0.434125		1956	0.339067	0.521231		1956	2.30315	0.554698
	1957	-0.0111611	1.07031		1957	0.449516	0.0242103		1957	2.27664	0.687236
	1958	0.287051	1.44805		1958	0.670413	-0.307136		1958	2.43569	0.899298
	1959	0.823834	1.74626		1959	0.93273	-0.389973		1959	2.62124	1.08485
	1960	1.36062	2.16376		1960	1.22266	-0.127657		1960	2.56823	1.00533
	1961	1.75823	2.34268		1961	1.3193	0.341751		1961	2.32966	0.952314
	1962	1.95704	1.82578		1962	1.29169	1.00444		1962	2.22362	0.846283
	1963	1.95704	1.14983		1963	1.16743	1.55669		1963	2.11759	0.713744
	1964	1.51966	0.851622		1964	0.960342	1.74997		1964	2.11759	0.713744
	1965	1.02264	0.454005		1965	0.68422	1.70856		1965	2.30315	0.740252
	1966	0.545502	0.0563888		1966	0.573771	1.3496		1966	2.32966	0.713744
	1967	0.207528	0.116031		1967	0.50474	0.769741		1967	2.38267	0.634221
	1968	-0.0111611	0.831741		1968	0.559964	0.0380164		1968	2.62124	0.501682
	1969	0.187647	1.34864		1969	0.68422	-0.376167		1969	2.72727	0.607713
	1970	0.823834	1.60709		1970	1.00176	-0.514228		1970	2.56823	0.925806
	1971	1.20157	2.00471		1971	1.22266	-0.29333		1971	2.35616	1.13787
	1972	1.46002	2.16376		1972	1.38833	0.189884		1972	2.17061	1.19088
	1973	1.73835	1.68662		1973	1.36072	0.921608		1973	2.1441	1.16438
	1974	1.81787	0.871503		1974	1.34691	1.3634		1974	2.06458	0.925806
	1975	1.32085	0.513648		1975	1.11221	1.65333		1975	2.19712	0.554698
	1976	0.803953	0.294959		1976	0.918924	1.5843		1976	2.38267	0.475174
	1977	0.664787	0.036508		1977	0.573771	1.30818		1977	2.40918	0.52819
	1978	0.664787	0.0762697		1978	0.421903	0.548843		1978	2.54172	0.713744
	1979	0.446098	0.692575		1979	0.270036	-0.127657		1979	2.62124	0.793267
	1980	0.50574	1.40828		1980	0.366679	-0.597065		1980	2.59473	0.819775
	1981	0.883476	1.88542		1981	0.587577	-0.597065		1981	2.59473	0.819775
	1982	1.0624	2.20352		1982	0.93273	-0.417585		1982	2.4887	0.899298
	1983	1.04252	2.28304		1983	1.23646	0.20369		1983	2.40918	0.978822
	1984	1.24133	1.88542		1984	1.38833	0.907802		1984	2.32966	0.978822
	1985	1.51966	1.07031		1985	1.5402	1.5843		1985	2.1441	1.03184
	1986	1.49978	0.454005		1986	1.47117	1.86042		1986	2.01156	0.872791
	1987	1.24133	0.135912		1987	1.18124	1.86042		1987	2.1441	0.475174
	1988	1.18169	-0.00325364		1988	0.68422	1.37721		1988	2.38267	0.395651
	1989	1.16181	0.0762697		1989	0.394291	0.70071		1989	2.64775	0.475174
	1990	0.883476	0.57329		1990	0.242424	0.0104042		1990	2.8333	0.660729
	1991	0.565383	1.30888		1991	0.228618	-0.389973		1991	2.72727	0.846283
	1992	0.50574	1.84566		1992	0.421903	-0.555647		1992	2.46219	1.08485
	1993	0.605145	2.02459		1993	0.891311	-0.431392		1993	2.35616	0.978822
	1994	0.704549	2.04447		1994	1.33311	0.134659		1994	2.35616	0.76676
	1995	0.98288	1.74626		1995	1.58162	0.797353		1995	2.38267	0.793267
	1996	1.42026	1.14983		1996	1.56781	1.3496		1996	2.25013	0.872791
	1997	1.81787	0.513648		1997	1.49878	1.5843		1997	2.11759	0.978822
	1998	1.77811	0.255197		1998	1.11221	1.62572		1998	2.25013	0.925806
[truncated: 66,002 more rows]

## Sheet: Figure 2B
	Normalized force_Wt_-TEV_Elastic force											Stats of Wt _Elastic force
	SL (µm)	Sample1	Sample2	Sample3	Sample4	Sample5	Sample6		Avg	Err		At 2.4 µm SL			At 2.6 µm SL			At 2.8 µm SL			At 3.0 µm SL			At 3.2 µm SL			At 3.4 µm SL
	2.2	0	0	0	0	0	0		0	0		Unpaired t test			Unpaired t test			Unpaired t test			Unpaired t test			Unpaired t test			Unpaired t test
	2.4	-0.0223208	-0.00403404	0.0428631	0.0514985	0.0218609	-0.00211807		0.0146249	0.0118362		P value	0.9543		P value	0.5412		P value	0.7193		P value	0.19		P value	0.1141		P value	0.1096
	2.6	0.0224883	0.0252097	0.0500416	0.0429913	0.0441963	0.0306734		0.0359334	0.00462085		P value summary	ns		P value summary	ns		P value summary	ns		P value summary	ns		P value summary	ns		P value summary	ns
	2.8	0.0755961	0.0677458	0.119434	0.132313	0.0904077	0.13823		0.103954	0.0122711		Significantly different (P < 0.05)?	No		Significantly different (P < 0.05)?	No		Significantly different (P < 0.05)?	No		Significantly different (P < 0.05)?	No		Significantly different (P < 0.05)?	No		Significantly different (P < 0.05)?	No
	3	0.176832	0.151932	0.219934	0.193988	0.219029	0.251034		0.202125	0.0143994		One- or two-tailed P value?	Two-tailed		One- or two-tailed P value?	Two-tailed		One- or two-tailed P value?	Two-tailed		One- or two-tailed P value?	Two-tailed		One- or two-tailed P value?	Two-tailed		One- or two-tailed P value?	Two-tailed
	3.2	0.375984	0.334482	0.349148	0.349236	0.423899	0.42811		0.37681	0.0164994		t, df	t=0.05874, df=10		t, df	t=0.6326, df=10		t, df	t=0.3698, df=10		t, df	t=1.406, df=10		t, df	t=1.731, df=10		t, df	t=1.756, df=10
	3.4	0.628241	0.822765	0.583647	0.63634	0.692693	0.611743		0.662572	0.0352366
												How big is the difference?			How big is the difference?			How big is the difference?			How big is the difference?			How big is the difference?			How big is the difference?
	Normalized force_Wt_+TEV_Elastic force											Mean of Wt_-TEV_Elastic force	0.01463		Mean of Wt_-TEV_Elastic force	0.03593		Mean of Wt_-TEV_Elastic force	0.104		Mean of Wt_-TEV_Elastic force	0.2021		Mean of Wt_-TEV_Elastic force	0.3768		Mean of Wt_-TEV_Elastic force	0.6626
	SL (µm)	Sample1	Sample2	Sample3	Sample4	Sample5	Sample6		Avg	Err		Mean of Wt_+TEV_Elastic force	0.01563		Mean of Wt_+TEV_Elastic force	0.04284		Mean of Wt_+TEV_Elastic force	0.09865		Mean of Wt_+TEV_Elastic force	0.1644		Mean of Wt_+TEV_Elastic force	0.3363		Mean of Wt_+TEV_Elastic force	0.5882
	2.2	0	0	0	0	0	0		0	0		Difference between means ± SEM	0.001008 ± 0.01715		Difference between means ± SEM	0.006907 ± 0.01092		Difference between means ± SEM	-0.005308 ± 0.01435		Difference between means ± SEM	-0.03777 ± 0.02687		Difference between means ± SEM	-0.04056 ± 0.02343		Difference between means ± SEM	-0.07435 ± 0.04234
	2.4	0.0459008	0.0237599	-0.0401392	0.0334747	0.0256489	0.00515315		0.015633	0.0124113		95% confidence interval	-0.03721 to 0.03922		95% confidence interval	-0.01742 to 0.03123		95% confidence interval	-0.03729 to 0.02668		95% confidence interval	-0.09763 to 0.02209		95% confidence interval	-0.09275 to 0.01164		95% confidence interval	-0.1687 to 0.01999
	2.6	0.0624969	0.0273044	0.0005397	0.056869	0.0587672	0.051062		0.0428399	0.00989133		R squared (eta squared)	0.000345		R squared (eta squared)	0.03848		R squared (eta squared)	0.01349		R squared (eta squared)	0.165		R squared (eta squared)	0.2306		R squared (eta squared)	0.2357
	2.8	0.107306	0.066296	0.108218	0.116416	0.0888046	0.10484		0.0986468	0.00744789
	3	0.188627	0.134531	0.165646	0.069629	0.207413	0.220267		0.164352	0.0226814		F test to compare variances			F test to compare variances			F test to compare variances			F test to compare variances			F test to compare variances			F test to compare variances
	3.2	0.303139	0.294928	0.302039	0.356732	0.383017	0.377668		0.336254	0.0166296		F, DFn, Dfd	1.100, 5, 5		F, DFn, Dfd	4.582, 5, 5		F, DFn, Dfd	2.715, 5, 5		F, DFn, Dfd	2.481, 5, 5		F, DFn, Dfd	1.016, 5, 5		F, DFn, Dfd	2.254, 5, 5
	3.4	0.580293	0.661801	0.50543	0.594923	0.638719	0.548184		0.588225	0.0234728		P value	0.9196		P value	0.1203		P value	0.2971		P value	0.3413		P value	0.9867		P value	0.3934
												P value summary	ns		P value summary	ns		P value summary	ns		P value summary	ns		P value summary	ns		P value summary	ns
												Significantly different (P < 0.05)?	No		Significantly different (P < 0.05)?	No		Significantly different (P < 0.05)?	No		Significantly different (P < 0.05)?	No		Significantly different (P < 0.05)?	No		Significantly different (P < 0.05)?	No
												Data analyzed			Data analyzed			Data analyzed			Data analyzed			Data analyzed			Data analyzed
												Sample size, Wt_-TEV_Elastic force	6		Sample size, Wt_-TEV_Elastic force	6		Sample size, Wt_-TEV_Elastic force	6		Sample size, Wt_-TEV_Elastic force	6		Sample size, Wt_-TEV_Elastic force	6		Sample size, Wt_-TEV_Elastic force	6
												Sample size, Wt_+TEV_Elastic force	6		Sample size, Wt_+TEV_Elastic force	6		Sample size, Wt_+TEV_Elastic force	6		Sample size, Wt_+TEV_Elastic force	6		Sample size, Wt_+TEV_Elastic force	6		Sample size, Wt_+TEV_Elastic force	6
	Normalized force_Het_-TEV_Elastic force											Stats of Het _Elastic force
	SL (µm)	Sample1	Sample2	Sample3	Sample4	Sample5	Sample6		Avg	Err		At 2.4 µm SL			At 2.6 µm SL			At 2.8 µm SL			At 3.0 µm SL			At 3.2 µm SL			At 3.4 µm SL
	2.2	0	0	0	0	0	0		0	0		Unpaired t test			Unpaired t test			Unpaired t test			Unpaired t test			Unpaired t test			Unpaired t test
	2.4	0.0185311	0.00893572	0.0149259	0.0144664	0.0410001	-0.00441208		0.0155745	0.00605637		P value	0.3248		P value	0.4645		P value	0.0197		P value	0.0104		P value	0.0005		P value	<0.0001
	2.6	0.0577114	0.0373849	0.047355	0.0478229	0.0501896	0.0614262		0.050315	0.00346574		P value summary	ns		P value summary	ns		P value summary	*		P value summary	*		P value summary	***		P value summary	***
	2.8	0.128236	0.115491	0.104891	0.0702627	0.113204	0.164011		0.116016	0.0124875		Significantly different (P < 0.05)?	No		Significantly different (P < 0.05)?	No		Significantly different (P < 0.05)?	Yes		Significantly different (P < 0.05)?	Yes		Significantly different (P < 0.05)?	Yes		Significantly different (P < 0.05)?	Yes
	3	0.23533	0.212218	0.206361	0.151531	0.18672	0.301811		0.215662	0.0207021		One- or two-tailed P value?	Two-tailed		One- or two-tailed P value?	Two-tailed		One- or two-tailed P value?	Two-tailed		One- or two-tailed P value?	Two-tailed		One- or two-tailed P value?	Two-tailed		One- or two-tailed P value?	Two-tailed
	3.2	0.406415	0.380327	0.398844	0.283139	0.348853	0.419707		0.372881	0.020557		t, df	t=1.036, df=10		t, df	t=0.7605, df=10		t, df	t=2.773, df=10		t, df	t=3.145, df=10		t, df	t=4.997, df=10		t, df	t=7.597, df=10
	3.4	0.649988	0.623955	0.655137	0.554841	0.587126	0.582005		0.608842	0.0165051
												How big is the difference?			How big is the difference?			How big is the difference?			How big is the difference?			How big is the difference?			How big is the difference?
	Normalized force_Het_+TEV_Elastic force											Mean of Het_-TEV_Elastic force	0.01557		Mean of Het_-TEV_Elastic force	0.05032		Mean of Het_-TEV_Elastic force	0.116		Mean of Het_-TEV_Elastic force	0.2157		Mean of Het_-TEV_Elastic force	0.3729		Mean of Het_-TEV_Elastic force	0.6088
	SL (µm)	Sample1	Sample2	Sample3	Sample4	Sample5	Sample6		Avg	Err		Mean of Het_+TEV_Elastic force	0.007483		Mean of Het_+TEV_Elastic force	0.03891		Mean of Het_+TEV_Elastic force	0.06739		Mean of Het_+TEV_Elastic force	0.1367		Mean of Het_+TEV_Elastic force	0.25		Mean of Het_+TEV_Elastic force	0.4713
	2.2	0	0	0	0	0	0		0	0		Difference between means ± SEM	-0.008092 ± 0.007814		Difference between means ± SEM	-0.01141 ± 0.01500		Difference between means ± SEM	-0.04862 ± 0.01754		Difference between means (J - I) ± SEM	-0.07892 ± 0.02510		Difference between means ± SEM	-0.1229 ± 0.02460		Difference between means ± SEM	-0.1376 ± 0.01811
	2.4	0.00985653	0.00284162	0.014131	0.00924946	0.0222679	-0.0134545		0.007482	0.00493783		95% confidence interval	-0.02550 to 0.009318		95% confidence interval	-0.04483 to 0.02202		95% confidence interval	-0.08769 to -0.009552		95% confidence interval	-0.1348 to -0.02300		95% confidence interval	-0.1777 to -0.06810		95% confidence interval	-0.1779 to -0.09723
	2.6	0.0444658	0.00904879	0.0287764	0.000152402	0.0511495	0.099848		0.0389068	0.0145953		R squared (eta squared)	0.09686		R squared (eta squared)	0.05467		R squared (eta squared)	0.4347		R squared (eta squared)	0.4972		R squared (eta squared)	0.714		R squared (eta squared)	0.8523
	2.8	0.0901763	0.0374979	0.0496983	0.0383608	0.078062	0.110565		0.0673934	0.0123105
	3	0.143723	0.110431	0.118392	0.100222	0.152891	0.194777		0.136739	0.0141895		F test to compare variances			F test to compare variances			F test to compare variances			F test to compare variances			F test to compare variances			F test to compare variances
	3.2	0.267792	0.243885	0.255779	0.186949	0.266447	0.278988		0.249973	0.0135075		F, DFn, Dfd	1.505, 5, 5		F, DFn, Dfd	17.74, 5, 5		F, DFn, Dfd	1.029, 5, 5		F, DFn, Dfd	2.129, 5, 5		F, DFn, Dfd	2.316, 5, 5		F, DFn, Dfd	4.902, 5, 5
	3.4	0.46631	0.471994	0.483479	0.468963	0.495532	0.441287		0.471261	0.0074546		P value	0.6649		P value	0.0067		P value	0.9758		P value	0.4267		P value	0.378		P value	0.1059
												P value summary	ns		P value summary	**		P value summary	ns		P value summary	ns		P value summary	ns		P value summary	ns
												Significantly different (P < 0.05)?	No		Significantly different (P < 0.05)?	Yes		Significantly different (P < 0.05)?	No		Significantly different (P < 0.05)?	No		Significantly different (P < 0.05)?	No		Significantly different (P < 0.05)?	No
												Data analyzed			Data analyzed			Data analyzed			Data analyzed			Data analyzed			Data analyzed
												Sample size, Het_-TEV_Elastic force	6		Sample size, Het_-TEV_Elastic force	6		Sample size, Het_-TEV_Elastic force	6		Sample size, Het_-TEV_Elastic force	6		Sample size, Het_-TEV_Elastic force	6		Sample size, Het_-TEV_Elastic force	6
												Sample size, Het_+TEV_Elastic force	6		Sample size, Het_-+EV_Elastic force	6		Sample size, Het_+TEV_Elastic force	6		Sample size, Het_+TEV_Elastic force	6		Sample size, Het_+TEV_Elastic force	6		Sample size, Het_+TEV_Elastic force	6
	Normalized force_Hom_-TEV_Elastic force											Stats of Hom_Elastic force
	SL (µm)	Sample1	Sample2	Sample3	Sample4	Sample5	Sample6		Avg	Err		At 2.4 µm SL			At 2.6 µm SL			At 2.8 µm SL			At 3.0 µm SL			At 3.2 µm SL			At 3.4 µm SL
	2.2	0	0	0	0	0	0		0	0		Unpaired t test			Unpaired t test			Unpaired t test			Unpaired t test			Unpaired t test			Unpaired t test
	2.4	0.0383249	0.0345752	0.0214263	0.0140907	0.0196959	0.00567493		0.022298	0.00502927		P value	0.1092		P value	0.0006		P value	0.0007		P value	<0.0001		P value	<0.0001		P value	<0.0001
	2.6	0.0818398	0.0762139	0.055705	0.0490619	0.0633198	0.0424314		0.0614286	0.00628593		P value summary	ns		P value summary	***		P value summary	***		P value summary	***		P value summary	***		P value summary	***
	2.8	0.135949	0.129821	0.12161	0.106059	0.117703	0.0631237		0.112378	0.0107072		Significantly different (P < 0.05)?	No		Significantly different (P < 0.05)?	Yes		Significantly different (P < 0.05)?	Yes		Significantly different (P < 0.05)?	Yes		Significantly different (P < 0.05)?	Yes		Significantly different (P < 0.05)?	Yes
	3	0.221087	0.206866	0.216079	0.202939	0.205184	0.140447		0.198767	0.0120046		One- or two-tailed P value?	Two-tailed		One- or two-tailed P value?	Two-tailed		One- or two-tailed P value?	Two-tailed		One- or two-tailed P value?	Two-tailed		One- or two-tailed P value?	Two-tailed		One- or two-tailed P value?	Two-tailed
	3.2	0.394011	0.363199	0.36462	0.3586	0.371843	0.282028		0.355717	0.0155993		t, df	t=1.758, df=10		t, df	t=4.935, df=10		t, df	t=4.864, df=10		t, df	t=7.497, df=10		t, df	t=8.955, df=10		t, df	t=8.310, df=10
	3.4	0.682721	0.662401	0.596409	0.626469	0.667619	0.601672		0.639548	0.0148781
												How big is the difference?			How big is the difference?			How big is the difference?			How big is the difference?			How big is the difference?			How big is the difference?
	Normalized force_Hom_+TEV_Elastic force											Mean of Hom_-TEV_Elastic force	0.0223		Mean of Hom_-TEV_Elastic force	0.06143		Mean of Hom_-TEV_Elastic force	0.1124		Mean of Hom_-TEV_Elastic force	0.1988		Mean of Hom_-TEV_Elastic force	0.3557		Mean of Hom_-TEV_Elastic force	0.6395
	SL (µm)	Sample1	Sample2	Sample3	Sample4	Sample5	Sample6		Avg	Err		Mean of Hom_+TEV_Elastic force	0.009642		Mean of Hom_+TEV_Elastic force	0.0245		Mean of Hom_+TEV_Elastic force	0.05629		Mean of Hom_+TEV_Elastic force	0.09513		Mean of Hom_+TEV_Elastic force	0.1843		Mean of Hom_+TEV_Elastic force	0.3978
	2.2	0	0	0	0	0	0		0	0		Difference between means ± SEM	-0.01266 ± 0.007198		Difference between means ± SEM	-0.03693 ± 0.007483		Difference between means ± SEM	-0.05609 ± 0.01153		Difference between means ± SEM	-0.1036 ± 0.01382		Difference between means ± SEM	-0.1714 ± 0.01914		Difference between means ± SEM	-0.2417 ± 0.02909
	2.4	0.0330202	-0.00509524	0.00442548	0.00889585	0.00790209	0.00870746		0.00964264	0.0051491		95% confidence interval	-0.02869 to 0.003382		95% confidence interval	-0.05360 to -0.02025		95% confidence interval	-0.08178 to -0.03040		95% confidence interval	-0.1344 to -0.07283		95% confidence interval	-0.2140 to -0.1287		95% confidence interval	-0.3066 to -0.1769
	2.6	0.0375611	0.0173448	0.0240132	0.0303257	0.0282523	0.00952414		0.0245035	0.00405923		R squared (eta squared)	0.2362		R squared (eta squared)	0.7089		R squared (eta squared)	0.7029		R squared (eta squared)	0.8489		R squared (eta squared)	0.8891		R squared (eta squared)	0.8735
	2.8	0.0733201	0.0495076	0.0460506	0.0513094	0.0647407	0.0528165		0.0562908	0.00427846
	3	0.111347	0.0831702	0.0803284	0.0977387	0.118422	0.0797699		0.0951294	0.00685656		F test to compare variances			F test to compare variances			F test to compare variances			F test to compare variances			F test to compare variances			F test to compare variances
	3.2	0.203297	0.184149	0.149497	0.19685	0.217366	0.154916		0.184346	0.0110852		F, DFn, Dfd	1.048, 5, 5		F, DFn, Dfd	2.398, 5, 5		F, DFn, Dfd	6.263, 5, 5		F, DFn, Dfd	3.065, 5, 5		F, DFn, Dfd	1.980, 5, 5		F, DFn, Dfd	2.823, 5, 5
	3.4	0.449627	0.43174	0.286613	0.400432	0.442969	0.375452		0.397806	0.0249981		P value	0.9599		P value	0.3591		P value	0.0655		P value	0.2444		P value	0.4713		P value	0.2793
												P value summary	ns		P value summary	ns		P value summary	ns		P value summary	ns		P value summary	ns		P value summary	ns
												Significantly different (P < 0.05)?	No		Significantly different (P < 0.05)?	No		Significantly different (P < 0.05)?	No		Significantly different (P < 0.05)?	No		Significantly different (P < 0.05)?	No		Significantly different (P < 0.05)?	No
												Data analyzed			Data analyzed			Data analyzed			Data analyzed			Data analyzed			Data analyzed
												Sample size, Hom_-TEV_Elastic force	6		Sample size, Hom_-TEV_Elastic force	6		Sample size, Hom_-TEV_Elastic force	6		Sample size, Hom_-TEV_Elastic force	6		Sample size, Hom_-TEV_Elastic force	6		Sample size, Hom_-TEV_Elastic force	6
												Sample size, Hom_+TEV_Elastic force	6		Sample size, Hom_+TEV_Elastic force	6		Sample size, Hom_+TEV_Elastic force	6		Sample size, Hom_+TEV_Elastic force	6		Sample size, Hom_+TEV_Elastic force	6		Sample size, Hom_+TEV_Elastic force	6

## Sheet: Figure 2C
	Normalized elastic force (%)
	At 2.4 µm SL				At 2.6 µm SL				At 2.8 µm SL				At 3.0µm SL				At 3.2 µm SL				At 3.4 µm SL
	100% Titin	50.1% Titin	0% Titin		100% Titin	50.1% Titin	0% Titin		100% Titin	50.1% Titin	0% Titin		100% Titin	50.1% Titin	0% Titin		100% Titin	50.1% Titin	0% Titin		100% Titin	50.1% Titin	0% Titin
	3.8325	0.9857	3.302		5.7711	4.4466	3.7561		12.8236	9.0176	7.332		23.533	14.3723	11.1347		40.6415	26.7792	20.3297		64.9988	46.631	44.9627
	3.4575	0.2842	-0.51		3.7385	0.9049	1.7345		11.5491	3.7498	4.9508		21.2218	11.0431	8.317		38.0327	24.3885	18.4149		62.3955	47.1994	43.174
	2.1426	1.4131	0.4425		4.7355	2.8776	2.4013		10.4891	4.9698	4.6051		20.6361	11.8392	8.0328		39.8844	25.5779	14.9497		65.5137	48.3479	28.6613
	1.4091	0.9249	0.8896		4.7823	0.0152	3.0326		7.0263	3.8361	5.1309		15.1531	10.0222	9.7739		28.3139	18.6949	19.685		55.4841	46.8963	40.0432
	1.9696	2.2268	0.7902		5.019	5.115	2.8252		11.3204	7.8062	6.4741		18.672	15.2891	11.8422		34.8853	26.6447	21.7366		58.7126	49.5532	44.2969
	0.5675	-1.345	0.8707		6.1426	9.9848	0.9524		16.4011	11.0565	5.2816		30.1811	19.4777	7.977		41.9707	27.8988	15.4916		58.2005	44.1287	37.5452
	1.8531				8.184				13.5949				22.1087				39.4011				68.2721
	0.8936				7.6214				12.9821				20.6866				36.3199				66.2401
	1.4926				5.5705				12.161				21.6079				36.462				59.6409
	1.4466				4.9062				10.6059				20.2939				35.86				62.6469
	4.1				6.332				11.7703				20.5184				37.1843				66.7619
	-0.441				4.2431				6.3124				14.0447				28.2028				60.1672
	Linear reg.				Linear reg.				Linear reg.				Linear reg.				Linear reg.				Linear reg.
	Best-fit values				Best-fit values				Best-fit values				Best-fit values				Best-fit values				Best-fit values
	Slope	0.01053			Slope	0.03161			Slope	0.06114			Slope	0.1147			Slope	0.1844			Slope	0.2336
	Y-intercept	0.7167			Y-intercept	2.403			Y-intercept	4.979			Y-intercept	8.985			Y-intercept	17.54			Y-intercept	38.33
	X-intercept	-68.09			X-intercept	-76.02			X-intercept	-81.43			X-intercept	-78.32			X-intercept	-95.15			X-intercept	-164.1
	1/slope	94.99			1/slope	31.64			1/slope	16.35			1/slope	8.717			1/slope	5.423			1/slope	4.281
	Std. Error				Std. Error				Std. Error				Std. Error				Std. Error				Std. Error
	Slope	0.006035			Slope	0.009094			Slope	0.01203			Slope	0.01615			Slope	0.018			Slope	0.02104
	Y-intercept	0.4527			Y-intercept	0.6822			Y-intercept	0.9023			Y-intercept	1.212			Y-intercept	1.35			Y-intercept	1.578
	95% Confidence Intervals				95% Confidence Intervals				95% Confidence Intervals				95% Confidence Intervals				95% Confidence Intervals				95% Confidence Intervals
	Slope	-0.001988 to 0.02304			Slope	0.01275 to 0.05046			Slope	0.03620 to 0.08609			Slope	0.08122 to 0.1482			Slope	0.1471 to 0.2217			Slope	0.1900 to 0.2772
	Y-intercept	-0.2221 to 1.656			Y-intercept	0.9880 to 3.817			Y-intercept	3.108 to 6.850			Y-intercept	6.472 to 11.50			Y-intercept	14.74 to 20.34			Y-intercept	35.06 to 41.60
	X-intercept	-infinity to 10.76			X-intercept	-284.7 to -20.60			X-intercept	-183.0 to -37.33			X-intercept	-138.2 to -44.74			X-intercept	-136.2 to -67.52			X-intercept	-216.8 to -127.7
	Goodness of Fit				Goodness of Fit				Goodness of Fit				Goodness of Fit				Goodness of Fit				Goodness of Fit
	R square	0.1215			R square	0.3545			R square	0.5402			R square	0.6963			R square	0.8267			R square	0.8486
	Sy.x	1.225			Sy.x	1.847			Sy.x	2.442			Sy.x	3.28			Sy.x	3.655			Sy.x	4.272
	Is slope significantly non-zero?				Is slope significantly non-zero?				Is slope significantly non-zero?				Is slope significantly non-zero?				Is slope significantly non-zero?				Is slope significantly non-zero?
	F	3.043			F	12.08			F	25.84			F	50.44			F	105			F	123.3
	DFn, DFd	1, 22			DFn, DFd	1, 22			DFn, DFd	1, 22			DFn, DFd	1, 22			DFn, DFd	1, 22			DFn, DFd	1, 22
	P value	0.095			P value	0.0021			P value	<0.0001			P value	<0.0001			P value	<0.0001			P value	<0.0001
	Deviation from zero?	Not Significant			Deviation from zero?	Significant			Deviation from zero?	Significant			Deviation from zero?	Significant			Deviation from zero?	Significant			Deviation from zero?	Significant
	Equation	Y = 0.01053*X + 0.7167			Equation	Y = 0.03161*X + 2.403			Equation	Y = 0.06114*X + 4.979			Equation	Y = 0.1147*X + 8.985			Equation	Y = 0.1844*X + 17.54			Equation	Y = 0.2336*X + 38.33
	Data				Data				Data				Data				Data				Data
	Number of X values	24			Number of X values	24			Number of X values	24			Number of X values	24			Number of X values	24			Number of X values	24
	Maximum number of Y replicates	1			Maximum number of Y replicates	1			Maximum number of Y replicates	1			Maximum number of Y replicates	1			Maximum number of Y replicates	1			Maximum number of Y replicates	1
	Total number of values	24			Total number of values	24			Total number of values	24			Total number of values	24			Total number of values	24			Total number of values	24
	Number of missing values	0			Number of missing values	0			Number of missing values	0			Number of missing values	0			Number of missing values	0			Number of missing values	0

## Sheet: Figure 2D
	Normalized force_Wt_-TEV_Viscous force											Stats of Wt _Viscous force
	SL (µm)	Sample1	Sample2	Sample3	Sample4	Sample5	Sample6		Avg	Err		At 2.4 µm SL			At 2.6 µm SL			At 2.8 µm SL			At 3.0 µm SL			At 3.2 µm SL			At 3.4 µm SL
	2.2	0	0	0	0	0	0		0	0		Unpaired t test			Unpaired t test			Unpaired t test			Unpaired t test			Unpaired t test			Unpaired t test
	2.4	0.0945975	0.0398776	0.0478564	0.0233935	0.0154036	0.0655835		0.0477854	0.0118522		P value	0.8859		P value	0.418		P value	0.8986		P value	0.4705		P value	0.773		P value	0.9662
	2.6	0.0879594	0.0336743	0.11007	0.104208	0.0215654	0.0695184		0.0711659	0.0150065		P value summary	ns		P value summary	ns		P value summary	ns		P value summary	ns		P value summary	ns		P value summary	ns
	2.8	0.117832	0.0345607	0.0765709	0.0552942	0.0516024	0.0577136		0.0655956	0.0117988		Significantly different (P < 0.05)?	No		Significantly different (P < 0.05)?	No		Significantly different (P < 0.05)?	No		Significantly different (P < 0.05)?	No		Significantly different (P < 0.05)?	No		Significantly different (P < 0.05)?	No
	3	0.192514	0.0567151	0.136393	0.102081	0.0916517	0.137725		0.119513	0.0191219		One- or two-tailed P value?	Two-tailed		One- or two-tailed P value?	Two-tailed		One- or two-tailed P value?	Two-tailed		One- or two-tailed P value?	Two-tailed		One- or two-tailed P value?	Two-tailed		One- or two-tailed P value?	Two-tailed
	3.2	0.257235	0.12318	0.270392	0.221177	0.179454	0.261024		0.218744	0.0235363		t, df	t=0.1472, df=10		t, df	t=0.8448, df=10		t, df	t=0.1306, df=10		t, df	t=0.7500, df=10		t, df	t=0.2964, df=10		t, df	t=0.04339, df=10
	3.4	0.371759	0.177235	0.416353	0.36366	0.307307	0.388257		0.337428	0.0352366
												How big is the difference?			How big is the difference?			How big is the difference?			How big is the difference?			How big is the difference?			How big is the difference?
	Normalized force_Wt_+TEV_Viscous force											Mean of Wt_-TEV_Viscous force	0.04779		Mean of Wt_-TEV_Viscous force	0.07117		Mean of Wt_-TEV_Viscous force	0.0656		Mean of Wt_-TEV_Viscous force	0.1195		Mean of Wt_-TEV_Viscous force	0.2187		Mean of Wt_-TEV_Viscous force	0.3374
	SL (µm)	Sample1	Sample2	Sample3	Sample4	Sample5	Sample6		Avg	Err		Mean of Wt_+TEV_Viscous force	0.04502		Mean of Wt_+TEV_Viscous force	0.05533		Mean of Wt_+TEV_Viscous force	0.06769		Mean of Wt_+TEV_Viscous force	0.1428		Mean of Wt_+TEV_Viscous force	0.2288		Mean of Wt_+TEV_Viscous force	0.3394
	2.2	0	0	0	0	0	0		0	0		Difference between means ± SEM	-0.002766 ± 0.01879		Difference between means ± SEM	-0.01583 ± 0.01874		Difference between means ± SEM	0.002092 ± 0.01602		Difference between means ± SEM	0.02325 ± 0.03100		Difference between means ± SEM	0.01007 ± 0.03397		Difference between means ± SEM	0.001932 ± 0.04452
	2.4	0.0331923	0.0159508	0.112464	0.0404079	0.0169443	0.0511552		0.0450191	0.014584		95% confidence interval	-0.04464 to 0.03911		95% confidence interval	-0.05758 to 0.02592		95% confidence interval	-0.03359 to 0.03778		95% confidence interval	-0.04582 to 0.09233		95% confidence interval	-0.06562 to 0.08576		95% confidence interval	-0.09727 to 0.1011
	2.6	0.0713626	0.0319022	0.0981071	0.0552931	0.0215651	0.0537782		0.0553347	0.0112224		R squared (eta squared)	0.002162		R squared (eta squared)	0.06662		R squared (eta squared)	0.001704		R squared (eta squared)	0.05326		R squared (eta squared)	0.008707		R squared (eta squared)	0.0001882
	2.8	0.107874	0.0319022	0.0526433	0.0616742	0.0654659	0.0865702		0.0676883	0.0108313
	3	0.174258	0.067349	0.136393	0.229683	0.0862624	0.162647		0.142765	0.0244012		F test to compare variances			F test to compare variances			F test to compare variances			F test to compare variances			F test to compare variances			F test to compare variances
	3.2	0.29043	0.132041	0.256035	0.240317	0.182535	0.271511		0.228812	0.0244946		F, DFn, Dfd	1.514, 5, 5		F, DFn, Dfd	1.788, 5, 5		F, DFn, Dfd	1.187, 5, 5		F, DFn, Dfd	1.628, 5, 5		F, DFn, Dfd	1.083, 5, 5		F, DFn, Dfd	1.676, 5, 5
	3.4	0.345196	0.233949	0.411572	0.363662	0.289592	0.392191		0.33936	0.0272144		P value	0.6601		P value	0.5391		P value	0.8556		P value	0.6056		P value	0.9323		P value	0.5845
												P value summary	ns		P value summary	ns		P value summary	ns		P value summary	ns		P value summary	ns		P value summary	ns
												Significantly different (P < 0.05)?	No		Significantly different (P < 0.05)?	No		Significantly different (P < 0.05)?	No		Significantly different (P < 0.05)?	No		Significantly different (P < 0.05)?	No		Significantly different (P < 0.05)?	No
												Data analyzed			Data analyzed			Data analyzed			Data analyzed			Data analyzed			Data analyzed
												Sample size, Wt_-TEV_Viscous force	6		Sample size, Wt_-TEV_Viscous force	6		Sample size, Wt_-TEV_Viscous force	6		Sample size, Wt_-TEV_Viscous force	6		Sample size, Wt_-TEV_Viscous force	6		Sample size, Wt_-TEV_Viscous force	6
												Sample size, Wt_+TEV_Viscous force	6		Sample size, Wt_+TEV_Viscous force	6		Sample size, Wt_+TEV_Viscous force	6		Sample size, Wt_+TEV_Viscous force	6		Sample size, Wt_+TEV_Viscous force	6		Sample size, Wt_+TEV_Viscous force	6
	Normalized force_Het_-TEV_Viscous force											Stats of Het _Viscous force
	SL (µm)	Sample1	Sample2	Sample3	Sample4	Sample5	Sample6		Avg	Err		At 2.4 µm SL			At 2.6 µm SL			At 2.8 µm SL			At 3.0 µm SL			At 3.2 µm SL			At 3.4 µm SL
	2.2	0	0	0	0	0	0		0	0		Unpaired t test			Unpaired t test			Unpaired t test			Unpaired t test			Unpaired t test			Unpaired t test
	2.4	0.0313442	0.0367254	0.0174349	0.0175879	0.0255996	0.124021		0.0421188	0.0166704		P value	0.8554		P value	0.1118		P value	0.0793		P value	0.0062		P value	0.0002		P value	0.0004
	2.6	0.0574646	0.0594846	0.0376595	0.020014	0.0610452	0.125551		0.0602032	0.0146087		P value summary	ns		P value summary	ns		P value summary	ns		P value summary	**		P value summary	***		P value summary	***
	2.8	0.0861964	0.0812092	0.0732272	0.0533706	0.0662961	0.128614		0.0814856	0.01054		Significantly different (P < 0.05)?	No		Significantly different (P < 0.05)?	No		Significantly different (P < 0.05)?	No		Significantly different (P < 0.05)?	Yes		Significantly different (P < 0.05)?	Yes		Significantly different (P < 0.05)?	Yes
	3	0.143005	0.146902	0.149592	0.0824817	0.134564	0.169954		0.13775	0.0120464		One- or two-tailed P value?	Two-tailed		One- or two-tailed P value?	Two-tailed		One- or two-tailed P value?	Two-tailed		One- or two-tailed P value?	Two-tailed		One- or two-tailed P value?	Two-tailed		One- or two-tailed P value?	Two-tailed
	3.2	0.218108	0.251388	0.230141	0.209235	0.237616	0.293968		0.240076	0.0123435		t, df	t=0.1870, df=10		t, df	t=1.744, df=10		t, df	t=1.953, df=10		t, df	t=3.452, df=10		t, df	t=5.643, df=10		t, df	t=5.140, df=10
	3.4	0.350012	0.376045	0.344863	0.445159	0.412874	0.417995		0.391158	0.0165051
												How big is the difference?			How big is the difference?			How big is the difference?			How big is the difference?			How big is the difference?			How big is the difference?
	Normalized force_Het_+TEV_Viscous force											Mean of Het_-TEV_Viscous force	0.04212		Mean of Het_-TEV_Viscous force	0.0602		Mean of Het_-TEV_Viscous force	0.08149		Mean of Het_-TEV_Viscous force	0.1377		Mean of Het_-TEV_Viscous force	0.2401		Mean of Het_-TEV_Viscous force	0.3912
	SL (µm)	Sample1	Sample2	Sample3	Sample4	Sample5	Sample6		Avg	Err		Mean of Het_+TEV_Viscous force	0.03801		Mean of Het_+TEV_Viscous force	0.03303		Mean of Het_+TEV_Viscous force	0.05399		Mean of Het_+TEV_Viscous force	0.08019		Mean of Het_+TEV_Viscous force	0.1556		Mean of Het_+TEV_Viscous force	0.2851
	2.2	0	0	0	0	0	0		0	0		Difference between means ± SEM	-0.004108 ± 0.02197		Difference between means ± SEM	-0.02718 ± 0.01559		Difference between means ± SEM	-0.02749 ± 0.01407		Difference between means ± SEM	-0.05756 ± 0.01667		Difference between means ± SEM	-0.08445 ± 0.01496		Difference between means ± SEM	-0.1060 ± 0.02062
	2.4	0.0352624	0.0315528	0.00941484	0.0236528	0.021005	0.107178		0.038011	0.0143137		95% confidence interval	-0.05307 to 0.04485		95% confidence interval	-0.06191 to 0.007551		95% confidence interval	-0.05885 to 0.003866		95% confidence interval	-0.09471 to -0.02040		95% confidence interval	-0.1178 to -0.05111		95% confidence interval	-0.1520 to -0.06006
	2.6	0.0437515	0.0367252	0.0216194	0.0503379	0.0150972	0.0306219		0.0330255	0.0054337		R squared (eta squared)	0.003483		R squared (eta squared)	0.2331		R squared (eta squared)	0.2762		R squared (eta squared)	0.5437		R squared (eta squared)	0.761		R squared (eta squared)	0.7255
	2.8	0.0574644	0.0418979	0.049864	0.0406342	0.0361019	0.0979918		0.0539924	0.00932708
	3	0.101869	0.0610363	0.0875235	0.0460927	0.0636706	0.120959		0.0801918	0.01153		F test to compare variances			F test to compare variances			F test to compare variances			F test to compare variances			F test to compare variances			F test to compare variances
	3.2	0.155419	0.136038	0.155519	0.132819	0.164101	0.189859		0.155626	0.00846094		F, DFn, Dfd	1.356, 5, 5		F, DFn, Dfd	7.228, 5, 5		F, DFn, Dfd	1.277, 5, 5		F, DFn, Dfd	1.092, 5, 5		F, DFn, Dfd	2.128, 5, 5		F, DFn, Dfd	1.781, 5, 5
	3.4	0.273606	0.283458	0.252459	0.298389	0.338045	0.264881		0.28514	0.0123677		P value	0.7462		P value	0.0488		P value	0.795		P value	0.9258		P value	0.4267		P value	0.5418
												P value summary	ns		P value summary	*		P value summary	ns		P value summary	ns		P value summary	ns		P value summary	ns
												Significantly different (P < 0.05)?	No		Significantly different (P < 0.05)?	Yes		Significantly different (P < 0.05)?	No		Significantly different (P < 0.05)?	No		Significantly different (P < 0.05)?	No		Significantly different (P < 0.05)?	No
												Data analyzed			Data analyzed			Data analyzed			Data analyzed			Data analyzed			Data analyzed
												Sample size, Het_-TEV_Viscous force	6		Sample size, Het_-TEV_Viscous force	6		Sample size, Het_-TEV_Viscous force	6		Sample size, Het_-TEV_Viscous force	6		Sample size, Het_-TEV_Viscous force	6		Sample size, Het_-TEV_Viscous force	6
												Sample size, Het_+TEV_Viscous force	6		Sample size, Het_+TEV_Viscous force	6		Sample size, Het_+TEV_Viscous force	6		Sample size, Het_+TEV_Viscous force	6		Sample size, Het_+TEV_Viscous force	6		Sample size, Het_+TEV_Viscous force	6
	Normalized force_Hom_-TEV_Viscous force											Stats of Hom _Viscous force
	SL (µm)	Sample1	Sample2	Sample3	Sample4	Sample5	Sample6		Avg	Err		At 2.4 µm SL			At 2.6 µm SL			At 2.8 µm SL			At 3.0 µm SL			At 3.2 µm SL			At 3.4 µm SL
	2.2	0	0	0	0	0	0		0	0		Unpaired t test			Unpaired t test			Unpaired t test			Unpaired t test			Unpaired t test			Unpaired t test
	2.4	0.0457854	0.0331614	0.0326463	0.0272331	0.0263145	0.0334891		0.033105	0.00283868		P value	0.0277		P value	0.0517		P value	<0.0001		P value	<0.0001		P value	<0.0001		P value	<0.0001
	2.6	0.0737852	0.061835	0.0671284	0.0525331	0.0511084	0.0370281		0.0572364	0.00535696		P value summary	*		P value summary	ns		P value summary	***		P value summary	***		P value summary	***		P value summary	***
	2.8	0.0932728	0.0780418	0.0903896	0.0824437	0.0757858	0.061533		0.0802445	0.00466315		Significantly different (P < 0.05)?	Yes		Significantly different (P < 0.05)?	No		Significantly different (P < 0.05)?	Yes		Significantly different (P < 0.05)?	Yes		Significantly different (P < 0.05)?	Yes		Significantly different (P < 0.05)?	Yes
	3	0.133761	0.117437	0.153846	0.135869	0.122216	0.105096		0.128037	0.00691072		One- or two-tailed P value?	Two-tailed		One- or two-tailed P value?	Two-tailed		One- or two-tailed P value?	Two-tailed		One- or two-tailed P value?	Two-tailed		One- or two-tailed P value?	Two-tailed		One- or two-tailed P value?	Two-tailed
	3.2	0.206411	0.191489	0.253418	0.235427	0.202914	0.209646		0.216551	0.00945172		t, df	t=2.574, df=10		t, df	t=2.208, df=10		t, df	t=7.328, df=10		t, df	t=7.788, df=10		t, df	t=11.57, df=10		t, df	t=9.586, df=10
	3.4	0.317279	0.337599	0.403591	0.37353	0.332382	0.398328		0.360451	0.0148781
												How big is the difference?			How big is the difference?			How big is the difference?			How big is the difference?			How big is the difference?			How big is the difference?
	Normalized force_Hom_+TEV_Viscous force											Mean of Hom_-TEV_Viscous force	0.0331		Mean of Hom_-TEV_Viscous force	0.05724		Mean of Hom_-TEV_Viscous force	0.08024		Mean of Hom_-TEV_Viscous force	0.128		Mean of Hom_-TEV_Viscous force	0.2166		Mean of Hom_-TEV_Viscous force	0.3605
	SL (µm)	Sample1	Sample2	Sample3	Sample4	Sample5	Sample6		Avg	Err		Mean of Hom_+TEV_Viscous force	0.02205		Mean of Hom_+TEV_Viscous force	0.04148		Mean of Hom_+TEV_Viscous force	0.03926		Mean of Hom_+TEV_Viscous force	0.0655		Mean of Hom_+TEV_Viscous force	0.1048		Mean of Hom_+TEV_Viscous force	0.1832
	2.2	0	0	0	0	0	0		0	0		Difference between means ± SEM	-0.01105 ± 0.004295		Difference between means ± SEM	-0.01575 ± 0.007134		Difference between means ± SEM	-0.04098 ± 0.005592		Difference between means ± SEM	-0.06254 ± 0.008029		Difference between means ± SEM	-0.1118 ± 0.009659		Difference between means (N - M) ± SEM	-0.1773 ± 0.01849
	2.4	0.0215681	0.0366529	0.0183647	0.0151802	0.0242095	0.0163346		0.0220517	0.00322274		95% confidence interval	-0.02062 to -0.001484		95% confidence interval	-0.03165 to 0.0001418		95% confidence interval	-0.05344 to -0.02852		95% confidence interval	-0.08043 to -0.04465		95% confidence interval	-0.1333 to -0.09028		95% confidence interval	-0.2185 to -0.1361
	2.6	0.0539202	0.049367	0.0269346	0.0276803	0.0428049	0.0481918		0.0414831	0.00471086		R squared (eta squared)	0.3985		R squared (eta squared)	0.3278		R squared (eta squared)	0.843		R squared (eta squared)	0.8585		R squared (eta squared)	0.9305		R squared (eta squared)	0.9019
	2.8	0.0334862	0.0493692	0.0379495	0.0464293	0.0389456	0.0294031		0.0392638	0.0030871
	3	0.0590293	0.0815311	0.0624354	0.0736645	0.0550853	0.0612593		0.0655008	0.00408806		F test to compare variances			F test to compare variances			F test to compare variances			F test to compare variances			F test to compare variances			F test to compare variances
	3.2	0.0964879	0.103974	0.105285	0.109827	0.103503	0.109452		0.104755	0.00198822		F, DFn, Dfd	1.289, 5, 5		F, DFn, Dfd	1.293, 5, 5		F, DFn, Dfd	2.282, 5, 5		F, DFn, Dfd	2.858, 5, 5		F, DFn, Dfd	22.60, 5, 5		F, DFn, Dfd	1.834, 5, 5
	3.4	0.145302	0.19074	0.183022	0.186615	0.16701	0.226257		0.183158	0.0109861		P value	0.7874		P value	0.7848		P value	0.3863		P value	0.2739		P value	0.0038		P value	0.5217
												P value summary	ns		P value summary	ns		P value summary	ns		P value summary	ns		P value summary	**		P value summary	ns
												Significantly different (P < 0.05)?	No		Significantly different (P < 0.05)?	No		Significantly different (P < 0.05)?	No		Significantly different (P < 0.05)?	No		Significantly different (P < 0.05)?	Yes		Significantly different (P < 0.05)?	No
												Data analyzed			Data analyzed			Data analyzed			Data analyzed			Data analyzed			Data analyzed
												Sample size, Hom_-TEV_Viscous force	6		Sample size, Hom_-TEV_Viscous force	6		Sample size, Hom_-TEV_Viscous force	6		Sample size, Hom_-TEV_Viscous force	6		Sample size, Hom_-TEV_Viscous force	6		Sample size, Hom_-TEV_Viscous force	6
												Sample size, Hom_+TEV_Viscous force	6		Sample size, Hom_+TEV_Viscous force	6		Sample size, Hom_+TEV_Viscous force	6		Sample size, Hom_+TEV_Viscous force	6		Sample size, Hom_+TEV_Viscous force	6		Sample size, Hom_+TEV_Viscous force	6

## Sheet: Figure 2E
	Normalized viscous force (%)
	At 2.4 µm SL				At 2.6 µm SL				At 2.8 µm SL				At 3.0µm SL				At 3.2 µm SL				At 3.4 µm SL
	100% Titin	50.1% Titin	0% Titin		100% Titin	50.1% Titin	0% Titin		100% Titin	50.1% Titin	0% Titin		100% Titin	50.1% Titin	0% Titin		100% Titin	50.1% Titin	0% Titin		100% Titin	50.1% Titin	0% Titin
	3.1344	3.5262	2.1568		5.7465	4.3752	5.392		8.6196	5.7464	3.3486		14.3005	10.1869	5.9029		21.8108	15.5419	9.6488		35.0012	27.3606	14.5302
	3.6725	3.1553	3.6653		5.9485	3.6725	4.9367		8.1209	4.1898	4.9369		14.6902	6.1036	8.1531		25.1388	13.6038	10.3974		37.6045	28.3458	19.074
	1.7435	0.9415	1.8365		3.7659	2.1619	2.6935		7.3227	4.9864	3.7949		14.9592	8.7523	6.2435		23.0141	15.5519	10.5285		34.4863	25.2459	18.3022
	1.7588	2.3653	1.518		2.0014	5.0338	2.768		5.3371	4.0634	4.6429		8.2482	4.6093	7.3665		20.9235	13.2819	10.9827		44.5159	29.8389	18.6615
	2.56	2.1005	2.4209		6.1045	1.5097	4.2805		6.6296	3.6102	3.8946		13.4564	6.3671	5.5085		23.7616	16.4101	10.3503		41.2874	33.8045	16.701
	12.4021	10.7178	1.6335		12.5551	3.0622	4.8192		12.8614	9.7992	2.9403		16.9954	12.0959	6.1259		29.3968	18.9859	10.9452		41.7995	26.4881	22.6257
	4.5785				7.3785				9.3273				13.3761				20.6411				31.7279
	3.3161				6.1835				7.8042				11.7437				19.1489				33.7599
	3.2646				6.7128				9.039				15.3846				25.3418				40.3591
	2.7233				5.2533				8.2444				13.5869				23.5427				37.353
	2.6314				5.1108				7.5786				12.2216				20.2914				33.2382
	3.3489				3.7028				6.1533				10.5096				20.9646				39.8328
	Linear reg.				Linear reg.				Linear reg.				Linear reg.				Linear reg.				Linear reg.
	Best-fit values				Best-fit values				Best-fit values				Best-fit values				Best-fit values				Best-fit values
	Slope	0.01408			Slope	0.02033			Slope	0.04271			Slope	0.07084			Slope	0.1256			Slope	0.1917
	Y-intercept	2.502			Y-intercept	3.528			Y-intercept	3.704			Y-intercept	5.858			Y-intercept	10.07			Y-intercept	18.51
	X-intercept	-177.6			X-intercept	-173.6			X-intercept	-86.74			X-intercept	-82.69			X-intercept	-80.24			X-intercept	-96.6
	1/slope	71			1/slope	49.2			1/slope	23.42			1/slope	14.12			1/slope	7.965			1/slope	5.218
	Std. Error				Std. Error				Std. Error				Std. Error				Std. Error				Std. Error
	Slope	0.01232			Slope	0.0101			Slope	0.008289			Slope	0.01096			Slope	0.0108			Slope	0.01597
	Y-intercept	0.9239			Y-intercept	0.7575			Y-intercept	0.6218			Y-intercept	0.822			Y-intercept	0.8105			Y-intercept	1.198
	95% Confidence Intervals				95% Confidence Intervals				95% Confidence Intervals				95% Confidence Intervals				95% Confidence Intervals				95% Confidence Intervals
	Slope	-0.01146 to 0.03963			Slope	-0.0006155 to 0.04127			Slope	0.02552 to 0.05990			Slope	0.04812 to 0.09357			Slope	0.1031 to 0.1480			Slope	0.1585 to 0.2248
	Y-intercept	0.5855 to 4.418			Y-intercept	1.957 to 5.099			Y-intercept	2.415 to 4.994			Y-intercept	4.153 to 7.562			Y-intercept	8.394 to 11.76			Y-intercept	16.03 to 21.00
	X-intercept	-infinity to -16.23			X-intercept	-infinity to -50.00			X-intercept	-189.6 to -41.62			X-intercept	-153.1 to -45.55			X-intercept	-112.3 to -57.57			X-intercept	-130.8 to -72.23
	Goodness of Fit				Goodness of Fit				Goodness of Fit				Goodness of Fit				Goodness of Fit				Goodness of Fit
	R square	0.05611			R square	0.1555			R square	0.5468			R square	0.6551			R square	0.8599			R square	0.8675
	Sy.x	2.501			Sy.x	2.051			Sy.x	1.683			Sy.x	2.225			Sy.x	2.194			Sy.x	3.243
	Is slope significantly non-zero?				Is slope significantly non-zero?				Is slope significantly non-zero?				Is slope significantly non-zero?				Is slope significantly non-zero?				Is slope significantly non-zero?
	F	1.308			F	4.052			F	26.54			F	41.8			F	135.1			F	144
	DFn, DFd	1, 22			DFn, DFd	1, 22			DFn, DFd	1, 22			DFn, DFd	1, 22			DFn, DFd	1, 22			DFn, DFd	1, 22
	P value	0.2651			P value	0.0565			P value	<0.0001			P value	<0.0001			P value	<0.0001			P value	<0.0001
	Deviation from zero?	Not Significant			Deviation from zero?	Not Significant			Deviation from zero?	Significant			Deviation from zero?	Significant			Deviation from zero?	Significant			Deviation from zero?	Significant
	Equation	Y = 0.01408*X + 2.502			Equation	Y = 0.02033*X + 3.528			Equation	Y = 0.04271*X + 3.704			Equation	Y = 0.07084*X + 5.858			Equation	Y = 0.1256*X + 10.07			Equation	Y = 0.1917*X + 18.51
	Data				Data				Data				Data				Data				Data
	Number of X values	24			Number of X values	24			Number of X values	24			Number of X values	24			Number of X values	24			Number of X values	24
	Maximum number of Y replicates	1			Maximum number of Y replicates	1			Maximum number of Y replicates	1			Maximum number of Y replicates	1			Maximum number of Y replicates	1			Maximum number of Y replicates	1
	Total number of values	24			Total number of values	24			Total number of values	24			Total number of values	24			Total number of values	24			Total number of values	24
	Number of missing values	0			Number of missing values	0			Number of missing values	0			Number of missing values	0			Number of missing values	0			Number of missing values	0
