# Supplementary material for: Graded titin cleavage progressively reduces tension and uncovers the source of A-band stability in contracting muscle
Source: eLife. 2020 Dec 24;9:e64107. doi: 10.7554/eLife.64107 (PMC7781594; doi:10.7554/eLife.64107)
Supplement: Figure 3—source data 1. [file elife-64107-fig3-data1.xlsx]

## Sheet: Figure 3B
	Indentation (nm)
	WT-TEV	WT+TEV	Hom-TEV	Hom+TEV		Ordinary one-way ANOVA
	332.602	343.417	294.069	373.03		Table Analyzed	indentation (nm)
	305.154	281.332	274.937	362.617		Data sets analyzed	A-D
	268.665	242.095	279.124	325.723
	280.313	295.182	329.598	401.405		ANOVA summary
	281.697	293.132	277.002	359.841		F	36.17
	358.358	362.488	300.338	349.879		P value	<0.0001
	276.464	286.936	266.315	341.891		P value summary	***
	369.511	392.414	298.723	333.409		Significant diff. among means (P < 0.05)?	Yes
	336.538	348.855	319.739	396.102		R square	0.4366
	389.811	415.662	257.925	316.161
	312.918	309.212	282.42	349.388		Brown-Forsythe test
	286.922	311.913	259.936	326.589		F (DFn, DFd)	11.52 (3, 140)
	250.685	265.939	275.289	317.892		P value	<0.0001
	236.699	231.181	217.701	255.037		P value summary	***
	279.22	270.888	256.613	325.201		Are SDs significantly different (P < 0.05)?	Yes
	255.801	271.972	237.666	288.934
	321.193	338.65	257.557	315.11		Bartlett's test
	319.758	311.585	336.819	416.874		Bartlett's statistic (corrected)	25.33
	268.949	280.171	349.2	509.487		P value	<0.0001
	245.018	266.431	336.926	488.245		P value summary	***
	322.478	355.945	332.554	449.833		Are SDs significantly different (P < 0.05)?	Yes
	301.081	319.361	318.138	459.175
	269.167	291.219	324.865	496.868		ANOVA table	SS	DF	MS	F (DFn, DFd)	P value
	263.17	275.065	299.794	446.976		Treatment (between columns)	221212	3	73737	F (3, 140) = 36.17	P<0.0001
	283.789	301.196	301.645	447.69		Residual (within columns)	285402	140	2039
	299.067	331.131	377.253	467.881		Total	506614	143
	307.344	317.827	338.768	492.497
	273.769	299.402	326.928	464.677		Data summary
	295.085	318.598	305.518	484.684		Number of treatments (columns)	4
	325.481	333.241	314.285	406.285		Number of values (total)	144
	279.953	281.704	276.732	400.491
	270.967	300.174	293.972	389.793
	314.223	333.093	264.097	416.146		Multiple comparisons
	292.221	317.566	279.178	377.663		Number of families	1
	301.05	314.278				Number of comparisons per family	6
	296.31	301.103				Alpha	0.05
	306.787	323.119
	333.675	342.368				Tukey's multiple comparisons test	Mean Diff.	95.00% CI of diff.	Significant?	Summary	Adjusted P Value
						WT-TEV vs. WT+TEV	-12.21	-39.14 to 14.72	No	ns	0.6413	A-B
						WT-TEV vs. Hom-TEV	1.751	-25.96 to 29.47	No	ns	0.9984	A-C
						WT-TEV vs. Hom+TEV	-95.07	-122.8 to -67.35	Yes	***	<0.0001	A-D
						WT+TEV vs. Hom-TEV	13.96	-13.75 to 41.67	No	ns	0.5583	B-C
						WT+TEV vs. Hom+TEV	-82.86	-110.6 to -55.14	Yes	***	<0.0001	B-D
						Hom-TEV vs. Hom+TEV	-96.82	-125.3 to -68.35	Yes	***	<0.0001	C-D
						Test details	Mean 1	Mean 2	Mean Diff.	SE of diff.	n1	n2	q	DF
						WT-TEV vs. WT+TEV	297.7	309.9	-12.21	10.36	38	38	1.667	140
						WT-TEV vs. Hom-TEV	297.7	295.9	1.751	10.66	38	34	0.2324	140
						WT-TEV vs. Hom+TEV	297.7	392.7	-95.07	10.66	38	34	12.61	140
						WT+TEV vs. Hom-TEV	309.9	295.9	13.96	10.66	38	34	1.852	140
						WT+TEV vs. Hom+TEV	309.9	392.7	-82.86	10.66	38	34	10.99	140
						Hom-TEV vs. Hom+TEV	295.9	392.7	-96.82	10.95	34	34	12.5	140
	Young's Modulus (kPa)
	WT-TEV	WT+TEV	Hom-TEV	Hom+TEV		Ordinary one-way ANOVA
	3.93434	3.74996	4.73244	3.3124		Table Analyzed	Young's Modulus (Kpa)
	4.47693	5.05743	5.23491	3.4561		Data sets analyzed	A-D
	5.41929	6.33549	5.11756	4.05963
	5.08503	4.7057	3.98825	2.96746		ANOVA summary
	5.04761	4.75515	5.17648	3.49617		F	26.42
	3.5179	3.45795	4.58504	3.64655		P value	<0.0001
	5.1916	4.91	5.49118	3.77509		P value summary	***
	3.35983	3.07003	4.62228	3.92006		Significant diff. among means (P < 0.05)?	Yes
	3.86552	3.66262	4.17412	3.02725		R square	0.3615
	3.10083	2.8161	5.76128	4.24518
	4.31135	4.38909	5.02824	3.65424		Brown-Forsythe test
	4.91036	4.3322	5.69455	4.04349		F (DFn, DFd)	0.3183 (3, 140)
	6.01265	5.50283	5.22487	4.21056		P value	0.8122
	6.55336	6.78939	7.42965	5.85941		P value summary	ns
	5.11492	5.35272	5.80552	4.06941		Are SDs significantly different (P < 0.05)?	No
	5.83318	5.32075	6.51341	4.85916
	4.14581	3.82941	5.77363	4.26644		Bartlett's test
	4.17375	4.33904	3.86068	2.80383		Bartlett's statistic (corrected)	0.8678
	5.41071	5.0889	3.65719	2.0752		P value	0.8332
	6.22246	5.48759	3.85884	2.21209		P value summary	ns
	4.12106	3.55373	3.93519	2.50139		Are SDs significantly different (P < 0.05)?	No
	4.56808	4.18154	4.20567	2.42544
	5.40413	4.80208	4.07572	2.15475		ANOVA table	SS	DF	MS	F (DFn, DFd)	P value
	5.5899	5.23125	4.59753	2.52541		Treatment (between columns)	55.68	3	18.56	F (3, 140) = 26.42	P<0.0001
	4.9919	4.56546	4.55527	2.51937		Residual (within columns)	98.36	140	0.7025
	4.6143	3.96058	3.25694	2.35806		Total	154	143
	4.42916	4.21185	3.82741	2.1835
	5.26844	4.60656	4.0372	2.3825		Data summary
	4.70802	4.19657	4.46893	2.23651		Number of treatments (columns)	4
	4.06416	3.92303	4.28325	2.91415		Number of values (total)	144
	5.09485	5.04742	5.18406	2.97762
	5.35037	4.5888	4.73478	3.10104
	4.28452	3.92564	5.5605	2.81119		Multiple comparisons
	4.7774	4.21704	5.11608	3.25164		Number of families	1
	4.56879	4.28339				Number of comparisons per family	6
	4.67885	4.56758				Alpha	0.05
	4.44123	4.1088
	3.91537	3.7672				Tukey's multiple comparisons test	Mean Diff.	95.00% CI of diff.	Significant?	Summary	Adjusted P Value
						WT-TEV vs. WT+TEV	0.2597	-0.2403 to 0.7596	No	ns	0.5326	A-B
						WT-TEV vs. Hom-TEV	-0.05932	-0.5738 to 0.4552	No	ns	0.9906	A-C
						WT-TEV vs. Hom+TEV	1.507	0.9929 to 2.022	Yes	***	<0.0001	A-D
						WT+TEV vs. Hom-TEV	-0.319	-0.8335 to 0.1955	No	ns	0.3752	B-C
						WT+TEV vs. Hom+TEV	1.248	0.7332 to 1.762	Yes	***	<0.0001	B-D
						Hom-TEV vs. Hom+TEV	1.567	1.038 to 2.095	Yes	***	<0.0001	C-D
						Test details	Mean 1	Mean 2	Mean Diff.	SE of diff.	n1	n2	q	DF
						WT-TEV vs. WT+TEV	4.752	4.492	0.2597	0.1923	38	38	1.91	140
						WT-TEV vs. Hom-TEV	4.752	4.811	-0.05932	0.1979	38	34	0.424	140
						WT-TEV vs. Hom+TEV	4.752	3.244	1.507	0.1979	38	34	10.77	140
						WT+TEV vs. Hom-TEV	4.492	4.811	-0.319	0.1979	38	34	2.28	140
						WT+TEV vs. Hom+TEV	4.492	3.244	1.248	0.1979	38	34	8.918	140
						Hom-TEV vs. Hom+TEV	4.811	3.244	1.567	0.2033	34	34	10.9	140
