# Supplementary material for: Graded titin cleavage progressively reduces tension and uncovers the source of A-band stability in contracting muscle
Source: eLife. 2020 Dec 24;9:e64107. doi: 10.7554/eLife.64107 (PMC7781594; doi:10.7554/eLife.64107)
Supplement: Figure 4—source data 1. [file elife-64107-fig4-data1.xlsx]

## Sheet: Figure 4A Gel
	Coomassie stained 1.8% polyacrylamide gel

## Sheet: Figure 4B
	Time-resolved passive force decreases before/after TEV-treatment, at SL 3.3 µm
	Normalized passive force_Wt_-TEV
	Time (min)	Sample1	Sample2	Sample3	Sample4	Sample5	Sample6
	0	1	1	1	1	1	1
	1	0.934817	0.994615	1.0323	1.0169	1.01569	1.00568
	2	0.958138	0.957706	1.05071	1.00932	1.02044	1.0037
	3	0.932456	0.96905	1.04725	1.01999	1.02498	1.00628
	4	0.957041	0.973143	1.02019	1.01349	1.02859	1.00754
	5	0.930996	0.966056	1.02298	1.02412	1.03735	1.0185
	10	0.938162	0.958387	1.02614	1.02155	1.05329	1.00248
	15	0.951865	0.969699	1.00373	1.02007	1.039	1.01564
	20	0.946756	0.946224	1.00162	1.03737	1.05402	1.01401
	25	0.985772	0.961043	0.981691	1.03768	1.04569	0.988124
	30	0.957273	0.961633	0.998318	1.04026	1.0622	0.980318
	Normalized passive force_Wt_+TEV
	Time (min)	Sample1	Sample2	Sample3	Sample4	Sample5	Sample6
	0	1	1	1	1	1	1
	1	1.04462	1.04823	1.06384	1.0679	1.03432	1.03793
	2	1.0278	0.996925	1.02818	1.0469	1.03984	1.04509
	3	1.02354	1.04241	1.02746	1.04339	1.05946	1.05201
	4	1.03087	1.02415	1.06863	1.05758	1.04735	1.04361
	5	1.02469	1.04649	1.02402	1.05101	1.05687	1.06077
	10	1.02191	1.02618	1.04137	1.03886	1.06772	1.05394
	15	0.995246	0.977988	1.00499	1.0533	1.04167	1.03828
	20	0.969217	0.988807	1.01677	1.05333	1.05147	1.01591
	25	0.933336	0.93428	0.982977	0.975044	1.04293	0.969507
	30	0.927041	0.922453	0.995134	0.852584	1.05042	0.96647
	Normalized passive force_Het_+TEV
	Time (min)	Sample1	Sample2	Sample3	Sample4	Sample5	Sample6
	0	1	1	1	1	1	1
	1	0.9686	0.989274	0.897579	0.947847	0.857275	0.922135
	2	0.969993	0.939178	0.892027	0.927404	0.804235	0.898115
	3	0.971892	0.948505	0.875072	0.90864	0.772659	0.877651
	4	0.9768	0.944391	0.880126	0.904198	0.76163	0.909603
	5	0.980193	0.951278	0.882421	0.893453	0.756644	0.886022
	10	0.967128	0.955664	0.83162	0.861673	0.713378	0.886295
	15	0.94312	0.874517	0.805122	0.81762	0.653827	0.861027
	20	0.962898	0.872952	0.780838	0.802147	0.618802	0.849654
	25	0.936421	0.851883	0.741613	0.76662	0.579792	0.895916
	30	0.924679	0.85615	0.713843	0.757353	0.563542	0.89913
	Normalized passive force_Hom_+TEV
	Time (min)	Sample1	Sample2	Sample3	Sample4	Sample5	Sample6
	0	1	1	1	1	1	1
	1	0.817837	0.822394	0.81257	0.736554	0.777478	0.846687
	2	0.612736	0.657385	0.647998	0.566385	0.640189	0.682576
	3	0.553386	0.59794	0.560248	0.473083	0.56713	0.613442
	4	0.509151	0.571577	0.53409	0.424525	0.535292	0.581656
	5	0.493258	0.557603	0.523256	0.408218	0.511203	0.562087
	10	0.447122	0.496641	0.488754	0.356092	0.434159	0.447444
	15	0.396185	0.4364	0.483761	0.318886	0.361218	0.388407
	20	0.372047	0.420023	0.438341	0.327238	0.343804	0.349389
	25	0.351295	0.384324	0.413949	0.296844	0.325993	0.306754
	30	0.314085	0.358711	0.397024	0.272494	0.326811	0.284726

## Sheet: Figure 4D
	Z-disk order quantified by fracture area (nm2) (sarcomere length (SL): 3.0 - 3.6 μm)
	Wt+TEV	Het+TEV	Hom+TEV						Stats of fracture area (nm2)
	511.395	30.9601	292.482						One way ANOVA
	1071.32	1298.44	1960.83						Table Analyzed	F4D
	125.742	807.017	490.894						Data sets analyzed	A-C
	508.862	34.9609	1209.73
	634.729	1682.31	171.46						ANOVA summary
	154.475	2172.8	1841.68						F	7.241
	210.266	1237.54	3705.49						P value	0.0008
	45.2928	43.7893	4810.9						P value summary	***
	566.243	3653.74	292.714						Significant diff. among means (P < 0.05)?	Yes
	278.89	429.758	2111.83						R square	0.03494
	63.5505	371.5	3631.15
	48.0889	2797.9	1036.84						Brown-Forsythe test
	91.7919	1419.34	510.084						F (DFn, DFd)	9.809 (2, 400)
	3292.31	1294.7	6225.93						P value	<0.0001
	2487.81	2788.53	194.634						P value summary	****
	286.768	1181.41	337.922						Are SDs significantly different (P < 0.05)?	Yes
	3559.31	4222.99	43.3869
	280.167	996.87	4013						Bartlett's test
	40.256	543.735	1381.02						Bartlett's statistic (corrected)	73.1
	3776.16	2892.85	1942.74						P value	<0.0001
	2040.53	207.181	427.576						P value summary	****
	3281.94	2360.24	1344.43						Are SDs significantly different (P < 0.05)?	Yes
	274.722	1011.99	178.745
	1442.39	581.752	76.7679						ANOVA table	SS	DF	MS	F (DFn, DFd)	P value
	2072.66	1417.52	238.036						Treatment (between columns)	30482817	2	15241408	F (2, 400) = 7.241	P=0.0008
	2839.71	161.451	1755.4						Residual (within columns)	841936730	400	2104842
	579.777	881.003	4151.77						Total	872419547	402
	650.647	984.813	4455.82
	98.6265	441.39	383.144						Data summary
	8.43057	1249.07	1680.56						Number of treatments (columns)	3
	93.756	2368.51	854.414						Number of values (total)	403
	260.667	229.247	1144.17
	608.28	290.827	7605.8						Number of families	1
	291.712	292.227	7924.15						Number of comparisons per family	3
	356.078	3114.6	355.287						Alpha	0.05
	842.793	781.847	390.699
	1496.5	2735.01	1163.53						Tukey's multiple comparisons test	Mean Diff.	95.00% CI of diff.	Significant?	Summary	Adjusted P Value
	332.43	941.664	242.718						Wt+TEV vs. Het+TEV	-467.1	-959.9 to 25.77	No	ns	0.0675	A-B
	1073.86	2976.12	787.452						Wt+TEV vs. Hom+TEV	-882.7	-1436 to -329.4	Yes	***	0.0006	A-C
	476.948	279.776	290.623						Het+TEV vs. Hom+TEV	-415.7	-816.6 to -14.73	Yes	*	0.0401	B-C
	731.074	2978.9	1005.41
	201.174	815.807	5189.18						Test details	Mean 1	Mean 2	Mean Diff.	SE of diff.	n1	n2	q	DF
	1300.05	701.281	575.229						Wt+TEV vs. Het+TEV	908.1	1375	-467.1	209.5	60	239	3.153	400
	1852.47	293.787	252.897						Wt+TEV vs. Hom+TEV	908.1	1791	-882.7	235.2	60	104	5.308	400
	1715.98	718.398	282.816						Het+TEV vs. Hom+TEV	1375	1791	-415.7	170.4	239	104	3.449	400
	3212.45	3437.23	2927.02
	433.933	2493.18	172.152
	871.484	1952.21	1842.07
	214.669	134.454	11438.6
	289.849	3053.07	9.96389
	493.518	3586.13	1149.08
	3078.29	533.671	1604.6
	104.158	2886.98	5163.92
	952.617	2500.92	291.889
	228.759	4917.54	3917.46
	375.104	2456.91	642.128
	16.3962	533.373	27.574
	538.446	1174.68	2872.78
	246.83	3030.62	725.012
	474.643	607.091	310.032
		124.156	1351.58
		251.852	6489.46
		3021.9	2505.34
		1033.74	35.0965
		193.268	66.7818
		3503.09	4002.96
		1405.7	276.128
		336.868	188.129
		785.952	741.099
		961.724	2418.92
		1413.48	1045.08
		259.174	1291.79
		2148.53	155.31
		41.2437	1951.81
		3846.65	396.295
		544.798	298.787
		2804.27	873.193
		416.506	933.155
		397.837	722.135
		374.581	959.556
		882.879	91.7579
		2175.84	304.796
		667.417	1711.6
		711.718	5119.47
		101.577	448.59
		1915.38	5905.56
		3437.88	32.4659
		455.029	4213.21
		3630.78	2059.42
		1914.4	1750.95
		928.692	50.7901
		3616.43	7165.26
		2756.72	952.652
		1368.05	1111.34
		1165.11	1337.3
		66.9749	1418.91
		1982.91	5472.29
		65.8	2913.08
		190.188	299.299
		365.436	300.334
		1660.76	261.842
		884.442	1292.64
		354.113	2799.41
		188.494	476.113
		340.976
		4131.55
		158.591
		1516.94
		418.736
		2238.8
		173.879
		512.706
		1377.76
		293.301
		332.866
		863.569
		4540.26
		1695.96
		2375.7
		133.42
		2730.69
		2266
		30.1483
		780.273
		304.601
		1227.15
		241.852
		2680.95
		1100.39
		64.8046
		2543.18
		859.838
		1323.56
		147.47
		1577.87
		1715.1
		230.548
		761.613
		413.523
		264.528
		674.257
		1056.6
		209.598
		738.861
		2190.85
		297.067
		1030.56
		779.312
		1568.05
		3127.48
		1340.78
		622.962
		1392.2
		1486.61
		2656.51
		1249.91
		2428.39
		2086.1
		2467.91
		1989.58
		456.159
		2175.99
		538.621
		140.355
		51.5245
		933.149
		1309.65
		148.348
		321.236
		1320.69
		119.608
		129.172
		3587.31
		3438.14
		1208.2
		4567.01
		566.566
		1883.72
		1129.48
		970.302
		790.226
		1948.71
		2400.78
		1029.23
		761.006
		557.371
		2093.87
		273.89
		2703.14
		282.744
		450.882
		1299.7
		81.552
		1490.74
		333.737
		1253.94
		1773.33
		2404.96
		696.844
		1632.24
		49.8076
		603.14
		385.408
		2192.35
		1629.27
		406.38
		3421.55
		160.657
		4309.25
		561.289
		1548.89
		2161.2
		507.747
		172.091
		3359.65
		127.121
		1703.82
		451.425
		1745.88
		2017.43
		2306.24
		932.216
		156.796
		1658.23
		61.4901
		744.572
		2065.38
		1533.05
		1065.48
		848.558
		3083.39
		3430.13
		2115.73
		1730.24
		760.854
		545.568
		2292.44
		4171.33
		3269.72
