# Supplementary material for: Graded titin cleavage progressively reduces tension and uncovers the source of A-band stability in contracting muscle
Source: eLife. 2020 Dec 24;9:e64107. doi: 10.7554/eLife.64107 (PMC7781594; doi:10.7554/eLife.64107)
Supplement: Figure 5—source data 1. [file elife-64107-fig5-data1.xlsx]

## Sheet: Figure 5B
	Epitope distance from Z-disk center (nm)
	Wt_T12	Wt_N2A	Wt_PEVK	Het_T12	Het_N2A	Het_PEVK	Hom_T12	Hom_N2A	Hom_PEVK		Ordinary one-way ANOVA
	68.72	255.91	433.86	48.44	75.32	204.19	54.12	61.8534	98.0504		Table Analyzed	Fig. 5B
	75.45	261.36	421.59	51.88	118.91	157.07	62.84	80.766	100.185		Data sets analyzed	A-I
	61.35	266.82	429.77	49.18	95.93	171	44.39	151.2	74.7782
	92.51	262.27	416.82	37.13	58.37	170.41	62.78	201.6	171.584		ANOVA summary
	74.25	249.09	424.32	51.64	175.39	276.28	44.04	44.8014	115.557		F	649.9
	67.83	239.32	429.09	34.94	54.53	60.66	63.22	146.03	107.572		P value	<0.0001
	55.02	243.64	414.55	52.37	54.46	216.05	43.99	151.616	80.241		P value summary	***
	61.17	253.86	434.09	38.36	114.6	70.25	36.83	76.6836	92.113		Significant diff. among means (P < 0.05)?	Yes
	62.41	250.23	433.18	32.7	141.68	190.86	59.17	202.297	98.0504		R square	0.8136
	71.76	264.55	435.23	43.04	285.42	439.09	30.3	95.8566	71.5232
	62.09	275.45	435.91	47.95	233.37	93.44	53.06	123.963	246.24		Brown-Forsythe test
	79.77	261.36	429.09	57.53	102.08	54.09	54.08	173.96	37.93		F (DFn, DFd)	167.5 (8, 1191)
	68.13	245.91	435.23	63.44	75.02	136.2	46.94	170.318	43.54		P value	<0.0001
	60.89	265.23	442.73	47.95	135.67	424.55	47.96	199.412	125.94		P value summary	***
	63.39	273.64	450.91	34.68	162.71	419.32	64.81	141.002	115.47		Are SDs significantly different (P < 0.05)?	Yes
	57.36	267.95	457.27	47.95	125.02	420.91	56.12	147.844	125.94
	80.05	278.64	453.86	53.85	119.04	427.5	41.33	124.341	110.05		Bartlett's test
	50.57	252.27	433.41	42.05	286.14	432.2	48.47	186.152	75.61		Bartlett's statistic (corrected)	2133
	47.96	269.09	428.41	61.23	262.95	290.9	47.98	134.518	45.05		P value	<0.0001
	42.39	267.95	446.36	40.6	276.59	51.68	36.26	77.7966	65.26		P value summary	***
	61.7	280.23	444.77	69.35	283.64	429.09	50	106.987	207.7		Are SDs significantly different (P < 0.05)?	Yes
	89.9	292.95	422.95	44.26	263.86	414.55	45.15	179.987	188.59
	54.03	276.36	440.68	50.18	286.82	209.53	57.74	178.189	61.38		ANOVA table	SS	DF	MS	F (DFn, DFd)	P value
	78.03	293.64	427.27	62.03	263.86	113.64	38.3	93.9162	88.599		Treatment (between columns)	15607639	8	1950955	F (8, 1191) = 649.9	P<0.0001
	71.51	266.59	448.64	36.95	278.18	151.14	55.12	108.734	135.706		Residual (within columns)	3575428	1191	3002
	77.07	274.77	425.91	60.7	290	212.78	40.38	202.919	53.7866		Total	19183067	1199
	49.22	257.5	427.27	45.21	139.14	353.89	44.76	115.311	155.91
	76.2	286.14	436.59	45.21	89.06	148.46	39.07	108.154	124.874		Data summary
	64.64	262.95	442.73	55.91	100.62	192.59	49.66	95.8566	156.813		Number of treatments (columns)	9
	66.37	276.59	436.59	49.97	95.1	197.15	61.76	140.448	109.039		Number of values (total)	1200
	87.36	283.64	451.59	36.95	197.71	419.77	42.02	152.132	116.697
	64.23	263.86	442.05	54.76	189.62	410	40.62	116.529	60.5738		Multiple comparisons
	66.34	286.82	435.68	57.1	64.43	63.08	62.69	118.793	29.8		Number of families	1
	67.19	263.86	452.5	66.65	250.23	43.2	61.03	115.445	102.64		Number of comparisons per family	36
	56.95	278.18	443.86	42.89	264.55	113.08	40.72	25.2	45.69		Alpha	0.05
	64.19	290	434.09	51.16	275.45	245.95	58.8	134.4	76.79
	80.48	275	436.59	66.65	261.36	79.52	33.71	185.942	77.1022		Tukey's multiple comparisons test	Mean Diff.	95.00% CI of diff.	Significant?	Summary	Adjusted P Value
	79.17	264.32	415.23	63.05	245.91	433.41	36.52	268.93	134.005		Wt_T12 vs. Wt_N2A	-202.1	-222.9 to -181.2	Yes	***	<0.0001	A-B
	60.83	259.09	423.05	53.52	265.23	428.41	52.03	87.7002	142.615		Wt_T12 vs. Wt_PEVK	-367.9	-388.8 to -347.1	Yes	***	<0.0001	A-C
	82.1	250.23	430.91	41.63	273.64	420.23	41.53	168.84	162.068		Wt_T12 vs. Het_T12	4.108	-12.92 to 21.13	No	ns	0.998	A-D
	83.04	250.23	440.27	58.39	267.95	428.41	43.88	118.68	78.911		Wt_T12 vs. Het_N2A	-127.5	-148.3 to -106.6	Yes	***	<0.0001	A-E
	56.95	271.14	443.86	47.58	278.64	82.61	52.02	260.94	29.6982		Wt_T12 vs. Het_PEVK	-185.4	-206.2 to -164.5	Yes	***	<0.0001	A-F
	71.51	257.05	433.41	65.42	48.01	175.08	47.78	131.58	39.844		Wt_T12 vs. Hom_T12	13.48	-3.547 to 30.51	No	ns	0.2528	A-G
	56.55	273.18	428.41	44.02	235.7	226.2	51.37	62.21	100.887		Wt_T12 vs. Hom_N2A	-76.24	-97.09 to -55.39	Yes	***	<0.0001	A-H
	67.24	272.5	420.23	49.97	233.08	197.51	32.45	224.2	102.535		Wt_T12 vs. Hom_PEVK	-57.02	-77.88 to -36.17	Yes	***	<0.0001	A-I
	47.83	248.86	419.77	49.97	97.94	162.3	36.52	161.28	105.61		Wt_N2A vs. Wt_PEVK	-165.8	-189.9 to -141.8	Yes	***	<0.0001	B-C
	55.1	249.09	439.09	71.36	251.46	212.25	40.9	88.46	108.54		Wt_N2A vs. Het_T12	206.2	185.3 to 227.0	Yes	***	<0.0001	B-D
	75.9	239.32	408.86	35.68	197.17	135.45	54.23	48.2	191.91		Wt_N2A vs. Het_N2A	74.6	50.52 to 98.68	Yes	***	<0.0001	B-E
	65.41	243.64	428.64	59.47	140.13	274.22	31.39	182.73	201.49		Wt_N2A vs. Het_PEVK	16.71	-7.367 to 40.79	No	ns	0.4351	B-F
	50.29	253.86	412.27	48.9	126.35	165.77	50.83	115.32	44.33		Wt_N2A vs. Hom_T12	215.5	194.7 to 236.4	Yes	***	<0.0001	B-G
	65.56	250.23	420.23	75.27	32.9	225.07	38.99	56.54	89.92		Wt_N2A vs. Hom_N2A	125.8	101.8 to 149.9	Yes	***	<0.0001	B-H
	87.86	264.55	419.77	46.52	253.86	146.93	41.91	163.89	84.1		Wt_N2A vs. Hom_PEVK	145	121.0 to 169.1	Yes	***	<0.0001	B-I
	59.75	275.45	439.09	71.61	240.19	181.27	35.04	88.3	178.79		Wt_PEVK vs. Het_T12	372	351.2 to 392.9	Yes	***	<0.0001	C-D
	76.49	261.36	408.86	57.53	111.67	123.38	52.37	120.98	109.19		Wt_PEVK vs. Het_N2A	240.4	216.4 to 264.5	Yes	***	<0.0001	C-E
	74.09	245.91	428.64	38.36	100.04	352.51	35.01	105.84	132.15		Wt_PEVK vs. Het_PEVK	182.5	158.5 to 206.6	Yes	***	<0.0001	C-F
	76.71	265.23	412.27	46.52	92.95	155.52	48.54	189.24	283.07		Wt_PEVK vs. Hom_T12	381.4	360.5 to 402.2	Yes	***	<0.0001	C-G
	52.85	273.64	428.86	53.85	38.99	431.36	40.1	117.69	53.38		Wt_PEVK vs. Hom_N2A	291.7	267.6 to 315.7	Yes	***	<0.0001	C-H
	94.37	267.95	415.23	47.95	145.25	420	38.97	190.42	237.88		Wt_PEVK vs. Hom_PEVK	310.9	286.8 to 335.0	Yes	***	<0.0001	C-I
	65.84	278.64	437.05	57.53	269.01	433.18	36.48	117.6	95.29		Het_T12 vs. Het_N2A	-131.6	-152.4 to -110.7	Yes	***	<0.0001	D-E
	80.44	252.27	434.09	46.52	202.43	427.73	46.18	126	101.92		Het_T12 vs. Het_PEVK	-189.5	-210.3 to -168.6	Yes	***	<0.0001	D-F
	86.45	269.09	433.18	54.76	63.36	414.09	48.17	82.7316	67.7236		Het_T12 vs. Hom_T12	9.371	-7.655 to 26.40	No	ns	0.7403	D-G
	59.08	267.95	435.23	58.39	252.27	427.5	42.5	143.783	42.8316		Het_T12 vs. Hom_N2A	-80.35	-101.2 to -59.49	Yes	***	<0.0001	D-H
	71.51	280.23	433.18	56.1	269.09	434.09	56.53	159.823	80.241		Het_T12 vs. Hom_PEVK	-61.13	-81.99 to -40.28	Yes	***	<0.0001	D-I
	84.31	292.95	427.73	58.39	267.95	428.64	56.33	236.548	77.4438		Het_N2A vs. Het_PEVK	-57.89	-81.97 to -33.81	Yes	***	<0.0001	E-F
	61.32	276.36	414.09	40.6	280.23	428.86	65.45	168.84	90.86		Het_N2A vs. Hom_T12	141	120.1 to 161.8	Yes	***	<0.0001	E-G
	61.32	262.95	427.5	62.03	292.95	261.8	49.1	95.0334	74.7782		Het_N2A vs. Hom_N2A	51.23	27.16 to 75.31	Yes	***	<0.0001	E-H
	64.18	276.59	433.41	71.61	276.36	237.89	46.86	134.4	69.902		Het_N2A vs. Hom_PEVK	70.45	46.37 to 94.53	Yes	***	<0.0001	E-I
	71.46	283.64	428.41	57.53	141.78	186.07	53.66	202.297	84.9394		Het_PEVK vs. Hom_T12	198.8	178.0 to 219.7	Yes	***	<0.0001	F-G
	70.91	263.86	420.23	38.36	78.03	196.32	35.28	109.2	182.02		Het_PEVK vs. Hom_N2A	109.1	85.04 to 133.2	Yes	***	<0.0001	F-H
	58.82	286.82	419.77	51.16	200.08	110.9	49.3	228.25	375.37		Het_PEVK vs. Hom_PEVK	128.3	104.3 to 152.4	Yes	***	<0.0001	F-I
	91.32	260.91	439.09	68.64	161.33	250.54	48.65	103.88	77.72		Hom_T12 vs. Hom_N2A	-89.72	-110.6 to -68.86	Yes	***	<0.0001	G-H
	84.18	236.14	416.82	78.94	124.78	428.86	54.07	95.39	127.16		Hom_T12 vs. Hom_PEVK	-70.5	-91.36 to -49.65	Yes	***	<0.0001	G-I
	85.43	255.23	424.32	53.85	248.59	455.23	61.96	141.98	385.74		Hom_N2A vs. Hom_PEVK	19.21	-4.865 to 43.29	No	ns	0.2429	H-I
	79.31	263.86	429.09	71.61	147.47	467.05	67.09	31.16	125.6
	78.18	236.14	414.55	47.95	128.26	427.5	48.41	84.13	39.56		Test details	Mean 1	Mean 2	Mean Diff.	SE of diff.	n1	n2	q	DF
	85.43	258.64	431.36	56.1	233.9	433.18	56.36	107.55	119.35		Wt_T12 vs. Wt_N2A	61.37	263.4	-202.1	6.71	200	100	42.59	1191
	69.35	248.41	420	47.95	85.21	435.23	58.74	38.19	89.69		Wt_T12 vs. Wt_PEVK	61.37	429.3	-367.9	6.71	200	100	77.54	1191
	52.42	252.27	433.18	63.44	208.8	433.18	63.06	107	91.36		Wt_T12 vs. Het_T12	61.37	57.26	4.108	5.479	200	200	1.06	1191
	52.67	268.41	427.73	56.1	104.19	54.01	52.72	142.69	40.4		Wt_T12 vs. Het_N2A	61.37	188.8	-127.5	6.71	200	100	26.86	1191
	68.13	277.27	414.09	56.1	266.59	30.53	45.23	51.61	118.75		Wt_T12 vs. Het_PEVK	61.37	246.7	-185.4	6.71	200	100	39.06	1191
	69.87	258.18	427.5	62.03	274.77	188.78	53.26	78.62	176.65		Wt_T12 vs. Hom_T12	61.37	47.89	13.48	5.479	200	200	3.479	1191
	76.61	276.59	427.5	62.03	275	132.25	47.88	71.76	196.06		Wt_T12 vs. Hom_N2A	61.37	137.6	-76.24	6.71	200	100	16.07	1191
	71.9	256.36	428.64	44.26	264.32	63.52	65.83	154.47	62.16		Wt_T12 vs. Hom_PEVK	61.37	118.4	-57.02	6.71	200	100	12.02	1191
	81.75	262.95	428.86	71.61	259.09	94.04	71.17	154.84	257.67		Wt_N2A vs. Wt_PEVK	263.4	429.3	-165.8	7.749	100	100	30.27	1191
	81.25	266.82	419.77	51.64	250.23	88.65	46.77	106.67	130.79		Wt_N2A vs. Het_T12	263.4	57.26	206.2	6.71	100	200	43.45	1191
	88.31	255.91	410	70.82	250.23	62.65	43.73	150.66	56.42		Wt_N2A vs. Het_N2A	263.4	188.8	74.6	7.749	100	100	13.62	1191
	76.68	283.18	424.55	64.93	271.14	48.73	37.29	94.65	93.18		Wt_N2A vs. Het_PEVK	263.4	246.7	16.71	7.749	100	100	3.05	1191
	65.65	269.55	419.32	45.76	257.05	408.86	42.56	261.96	145.32		Wt_N2A vs. Hom_T12	263.4	47.89	215.5	6.71	100	200	45.43	1191
	50.57	244.09	420.91	72.35	273.18	428.64	47.87	184.06	107.46		Wt_N2A vs. Hom_N2A	263.4	137.6	125.8	7.749	100	100	22.97	1191
	68.51	263.64	427.5	45.76	64.62	412.27	50.6	181.64	64.06		Wt_N2A vs. Hom_PEVK	263.4	118.4	145	7.749	100	100	26.47	1191
	59.34	267.73	433.41	76.2	60.56	239.26	49.97	168.57	174.38		Wt_PEVK vs. Het_T12	429.3	57.26	372	6.71	100	200	78.4	1191
	62.39	237.05	428.41	62.49	134.74	240.55	36.95	214.01	97.28		Wt_PEVK vs. Het_N2A	429.3	188.8	240.4	7.749	100	100	43.88	1191
	59.19	253.64	420.23	72.6	92.32	227.64	48.82	220.42	225.17		Wt_PEVK vs. Het_PEVK	429.3	246.7	182.5	7.749	100	100	33.32	1191
	64.23	246.14	428.41	60.14	272.5	158.2	36.95	162.75	93.35		Wt_PEVK vs. Hom_T12	429.3	47.89	381.4	6.71	100	200	80.38	1191
	49.27	280.68	420.23	54.95	248.86	162	37.33	159.89	59.92		Wt_PEVK vs. Hom_N2A	429.3	137.6	291.7	7.749	100	100	53.23	1191
	65.65	252.73	419.77	74.39	249.09	159.5	58.51	211.43	145.91		Wt_PEVK vs. Hom_PEVK	429.3	118.4	310.9	7.749	100	100	56.74	1191
	56.07	240.68	439.09	47.21	239.32	37.76	37.23	236.99	243.47		Het_T12 vs. Het_N2A	57.26	188.8	-131.6	6.71	200	100	27.73	1191
	83.74	245.91	408.86	70.2	243.64	130.66	45.29	115.66	116.47		Het_T12 vs. Het_PEVK	57.26	246.7	-189.5	6.71	200	100	39.93	1191
	61.63	234.09	428.64	52.87	119.73	23.35	45.52	55.67	106.93		Het_T12 vs. Hom_T12	57.26	47.89	9.371	5.479	200	200	2.419	1191
	74.67	249.32	419.77	60.91	257.5	81.53	37.33	245.26	325.04		Het_T12 vs. Hom_N2A	57.26	137.6	-80.35	6.71	200	100	16.93	1191
	64.56			80.07			42.05				Het_T12 vs. Hom_PEVK	57.26	118.4	-61.13	6.71	200	100	12.88	1191
	61.41			79.53			47.95				Het_N2A vs. Het_PEVK	188.8	246.7	-57.89	7.749	100	100	10.57	1191
	47.08			81.54			32.47				Het_N2A vs. Hom_T12	188.8	47.89	141	6.71	100	200	29.71	1191
	58.51			65.7			50.18				Het_N2A vs. Hom_N2A	188.8	137.6	51.23	7.749	100	100	9.351	1191
	49.62			76.6			34.68				Het_N2A vs. Hom_PEVK	188.8	118.4	70.45	7.749	100	100	12.86	1191
	45.55			62.91			50.18				Het_PEVK vs. Hom_T12	246.7	47.89	198.8	6.71	100	200	41.9	1191
	54.41			52.02			62.03				Het_PEVK vs. Hom_N2A	246.7	137.6	109.1	7.749	100	100	19.92	1191
	32.85			67.87			41.63				Het_PEVK vs. Hom_PEVK	246.7	118.4	128.3	7.749	100	100	23.42	1191
	54.96			55.73			45.21				Hom_T12 vs. Hom_N2A	47.89	137.6	-89.72	6.71	200	100	18.91	1191
	62.63			48.7			44.26				Hom_T12 vs. Hom_PEVK	47.89	118.4	-70.5	6.71	200	100	14.86	1191
	47.78			61.48			39.89				Hom_N2A vs. Hom_PEVK	137.6	118.4	19.21	7.749	100	100	3.507	1191
	63.86			58.65			37.33
	42.65			69.71			56.36
	50.4			58.03			56.86
	40.58			65.41			41.63
	57.93			71.8			34.68
	46.76			65.25			37.61
	52.02			47.95			44.02
	49.06			54.51			31.02
	57.82			79.26			36.17
	62.77			64			42.05
	43.62			54.51			25.09
	58.06			42.24			52.45
	55.34			73.56			32.14
	54.26			64.9			36.95
	39.89			38.1			39.27
	52.66			68.65			29.73
	61.06			55.19			33.32
	50.01			59.2			36.95
	30.85			53.61			34.68
	56.39			47.22			61.23
	50.94			66.96			47.87
	54.59			76.19			37.61
	35.04			43.46			36.17
	51.09			56.1			53.85
	50.01			64.33			51.09
	60.3			61.29			55.91
	35.96			72.66			72.59
	60.3			50.85			35.68
	63.04			50.54			62.26
	71.57			55.76			47.95
	60.52			62.52			45.76
	52.02			42.08			32.47
	59.31			52.58			34.06
	37.72			57.82			41.54
	42.06			46.43			56.92
	56.52			58.73			36.17
	50.94			42.89			61.23
	62.41			55.42			57.53
	37.9			71.96			50.18
	65.55			64			51.16
	46.54			68.42			42.89
	57.45			63.81			59.47
	53.36			81.51			45.91
	59.38			61.41			73.56
	51.88			46.1			48.53
	67.86			66.4			48.17
	60.25			61.96			34.68
	37.51			52.02			66.7
	57.92			60.85			58.57
	52.37			62.13			64.05
	50.04			48.15			45.29
	54.7			75.2			58.57
	40.61			56.03			37.8
	54.97			57.1			39.89
	49.92			36.9			56.92
	52.48			66.7			43.62
	55.76			67.63			39.89
	75.27			55.38			45.76
	42.38			58.91			28.77
	61.01			44.43			64.33
	53.9			50.03			67.13
	54.11			59.16			67.13
	52.15			59.16			59.77
	53.85			53.67			73.9
	49.68			62.25			38.36
	82.87			57.89			42.05
	58.27			61.86			61.23
	57.05			53.56			54.83
	54.47			78.12			47.95
	71.55			65.54			59.64
	55.19			61.91			64.36
	67.56			57.1			52.93
	46.15			44.43			60.45
	61.23			67.2			56.1
	42.6			49.96			35.6
	72.89			59.16			36.72
	40.43			57.1			29.88
	44.96			73.75			42.89
	59.98			60.7			31.72
	57.36			69.36			46.66
	58.85			73.23			33.91
	70.13			58.58			54.72
	51.45			60.45			71.43
	57.93			67.82			56.25
	61.12			52.96			33.98
	59.64			65.48			45.8
	60.68			41.63			60.66
	61.69			57.98			66.39
	44.47			69.01			59.18

## Sheet: Figure 5D
	Epitope distance from Z-disk center (nm)
	Hom -GSN/-TEV	Hom -GSN/+TEV	Hom +GSN/+TEV		Ordinary one-way ANOVA
	187.422	113.897	26.786		Table Analyzed	Fig. 5D
	174.881	130.658	45.125		Data sets analyzed	A-C
	172.919	140.403	27.939
	170.035	77.893	55.199		ANOVA summary
	174.387	118.383	73.2		F	3570
	155.147	122.7	25.761		P value	<0.0001
	162.52	106.062	35.455		P value summary	***
	173.429	102.667	67.856		Significant diff. among means (P < 0.05)?	Yes
	168.24	123.556	36.194		R square	0.8564
	162.641	79.667	40.046
	156.934	137.179	53.917		Brown-Forsythe test
	172.053	118.21	33.206		F (DFn, DFd)	224.3 (2, 1197)
	160.23	134.778	58.693		P value	<0.0001
	157.8	132.173	76		P value summary	***
	166.64	96.629	53.104		Are SDs significantly different (P < 0.05)?	Yes
	168.17	94.523	40.849
	167.488	81.057	66.471		Bartlett's test
	162.529	116.318	30.333		Bartlett's statistic (corrected)	745.9
	170.225	108.849	50.681		P value	<0.0001
	170.505	62.683	76.967		P value summary	***
	173	144.717	32.923		Are SDs significantly different (P < 0.05)?	Yes
	179.216	162.854	36.427
	183.057	71.234	58.667		ANOVA table	SS	DF	MS	F (DFn, DFd)	P value
	178.368	176.508	46.933		Treatment (between columns)	3978452	2	1989226	F (2, 1197) = 3570	P<0.0001
	174.566	78.696	55.124		Residual (within columns)	666937	1197	557.2
	179.998	172.484	41.77		Total	4645388	1199
	177.445	165	33.981
	179.855	66.091	24.874		Data summary
	192.882	77.806	33.5		Number of treatments (columns)	3
	197.858	160.282	55.681		Number of values (total)	1200
	189.417	147.773	49.222
	195	162.462	55.667		Multiple comparisons
	190.25	154.922	75.829		Number of families	1
	192.978	173.365	45.926		Number of comparisons per family	3
	194.97	92.101	48.778		Alpha	0.05
	168.156	174.534	73.355
	173.711	147.667	56.117		Tukey's multiple comparisons test	Mean Diff.	95.00% CI of diff.	Significant?	Summary	Adjusted P Value
	180.519	142.145	58.478		Hom-GSN&TEV vs. Hom+TEV	106.3	102.3 to 110.2	Yes	***	<0.0001	A-B
	181.683	154.99	48.369		Hom-GSN&TEV vs. Hom+GSN&TEV	133.4	129.5 to 137.4	Yes	***	<0.0001	A-C
	174.102	144.003	26.356		Hom+TEV vs. Hom+GSN&TEV	27.18	23.27 to 31.10	Yes	***	<0.0001	B-C
	175.659	98.346	68.944
	177.762	104.891	76.189		Test details	Mean 1	Mean 2	Mean Diff.	SE of diff.	n1	n2	q	DF
	172.72	55.842	68.283		Hom-GSN&TEV vs. Hom+TEV	179.1	72.83	106.3	1.669	400	400	90.04	1197
	171.305	106.753	75.738		Hom-GSN&TEV vs. Hom+GSN&TEV	179.1	45.65	133.4	1.669	400	400	113.1	1197
	173.251	59.8	36.478		Hom+TEV vs. Hom+GSN&TEV	72.83	45.65	27.18	1.669	400	400	23.03	1197
	169	54.222	51.365
	172.964	101.858	64.333
	159.909	49.476	51.056
	170.679	118.982	51.589
	175.738	113.42	59.413
	178.222	83.073	62.458
	164.111	79.847	36.667
	177.171	55.667	48.667
	190.181	73.815	39.393
	178.219	94	40.515
	195.111	114.879	26.056
	180.323	94.367	32.123
	178.699	50.651	25.989
	180.237	40.037	55.656
	187.333	107.806	36.532
	192.778	58.3	26.153
	190.667	94.92	62.587
	176.463	105.111	36.266
	179.464	106.597	34.152
	188.778	53.735	23.829
	169.014	103	33.346
	180.271	106.076	73.125
	179	78.881	36.731
	171.685	97.303	23.84
	172.467	114.271	27.539
	179.805	117.727	36.463
	167.333	120.432	34.25
	171.874	86.944	48.199
	158.59	123.083	47.02
	185.843	59.975	38.651
	181.524	131	59.995
	181.395	107.667	29.826
	184.778	58.333	37.966
	177.543	76	41.051
	171.08	99.423	49.87
	170.993	118.269	35.446
	173.79	55.533	75.747
	166.31	90.59	33
	169.326	66.83	39.459
	173.57	43.136	48.053
	159	118.556	62.074
	170.327	43.489	35.159
	166.547	119	31.818
	180.142	128.258	71.014
	172.485	112.274	65.125
	181.163	131.868	48.663
	174.291	123.397	46.486
	174.281	108.307	15.419
	171.13	47.132	40.454
	167.796	83.163	31.359
	166.296	68.68	78.354
	168.5	117.44	45.752
	171.799	136.059	65.237
	173.59	80.941	42.563
	176.556	152.751	43.428
	176.217	129.481	69.786
	176.327	84.837	72.066
	180.111	153.074	51.45
	175.747	96.556	27.333
	169.357	169.444	59.222
	176.624	116.093	45.156
	194.878	170.838	32.333
	187.278	46.323	42.667
	192.888	157.058	38.458
	193.986	88.924	59.222
	193.507	169.004	64.789
	192.171	170.056	39.657
	179	132.656	22.802
	183.8	159.074	41.235
	188.795	57.321	58.444
	182.663	92.636	29.522
	187.615	118.479	57.557
	195.002	114.646	28.556
	190.72	91.834	32.734
	193.25	117.386	42.667
	184.143	84.561	32.408
	184.08	106.463	36.333
	188.056	72.825	37.732
	177.489	87.827	64.667
	172.61	105.435	41.155
	177.967	81.814	38.328
	170.703	56.081	21.556
	166.581	44.849	48.554
	178.333	66.02	33.444
	181.216	102.29	46.693
	182.896	30.9	43.333
	178.025	82.093	34.464
	163.966	96.769	35.885
	172.839	89.097	50.111
	177.394	95.27	23.728
	169.249	42.156	63.556
	172.333	102	73.778
	187.163	99.612	62.145
	181.555	92.442	42.409
	173.563	8.111	43.667
	180.419	96.129	22.753
	169.84	69.589	46.254
	162.977	72.25	47.112
	167.898	121.156	53.003
	159.48	25.407	39.989
	170.252	53.259	69.242
	172.963	30.142	54.664
	167.722	63.587	32.162
	160.227	70.556	51.667
	171.44	111.368	39.381
	178.758	129.333	60.587
	170	69.055	48.302
	165.882	57.326	35.456
	175.667	89.863	25.522
	174	138.653	25.348
	184.047	63.478	32.505
	170.646	122.64	69.333
	172.582	58.968	50.537
	183.96	37.174	41.333
	171.529	70.875	47.145
	181.131	28.934	36.151
	170.76	71	61.158
	178.171	39.333	30.778
	171.667	95.444	41.01
	176.611	53.683	38.333
	171.351	149.852	34.861
	181.481	91	17.889
	174.567	93.317	41.167
	172.102	98.053	38.145
	169.963	102.2	53.722
	170.931	50.062	45.125
	169.833	97.299	65.564
	161.147	98.625	25.667
	166.581	65.307	51.167
	178	96.867	46.5
	169.56	70.444	46.944
	174.523	102.98	47.333
	177.202	102.178	49.639
	179.449	68.252	75.889
	178.849	38.991	61.667
	183.086	54.173	35.111
	190.238	58.995	72.333
	193.274	109.407	63.111
	178.27	98.941	79.507
	185	120.184	44.667
	184.19	55.204	54.696
	185.348	107.66	29.366
	194.17	128.351	33.147
	183.076	95.869	72.511
	184.858	114.983	39.599
	184.346	56.75	48.57
	182.25	118	33.132
	175.93	106.372	62.192
	175.653	19.879	31.334
	183.333	113.254	20.75
	191.076	55.442	42.406
	193.333	113.691	47
	185.957	95.698	28.874
	174.847	30.536	47.02
	185.52	63.014	36.325
	169.332	36.533	31.504
	180.347	54.058	52.198
	187.493	48.991	36.806
	180.662	35.439	33.154
	183.636	56.667	37.108
	201.447	54.088	69.678
	191.512	29.667	56.444
	189.933	24.052	51.419
	175.518	35.222	29.778
	188.417	54.644	64.311
	167.101	58.374	20.465
	178.335	25.139	31.44
	176.132	49.822	17.556
	191.765	16.75	56.781
	189.264	37.063	17.714
	201.102	42.394	63.554
	161.423	42.251	56.558
	177.914	52.456	65.147
	177.063	57.348	63.226
	181.199	46.75	61.258
	179.667	57.053	17.667
	184.644	54	16.333
	177.568	55.232	42.323
	176.889	55.11	28.825
	192.5	22.727	39.8
	192.226	52	42.556
	193.833	57.625	10.667
	192.343	45.76	52.426
	175.336	54.663	32.523
	186.115	62.657	24.514
	178.405	57.062	59.667
	161.654	17.635	79.892
	177.832	45.528	22.123
	190.667	37.897	43.556
	180.42	40.448	56.741
	184.647	48.733	76.333
	177.832	52.715	45.767
	181.955	37.725	42.691
	195.145	43.198	52.826
	177.698	43.048	39.333
	174.858	78.648	42.235
	167.402	42.793	42.708
	169.333	71.103	36.811
	171	40.462	35.254
	155.293	21.493	39.213
	171.074	43.667	37.85
	183.701	17.097	44.329
	171.381	34.333	46.463
	158.138	49.509	47.503
	162.807	26.667	39.423
	168.16	31.333	44.952
	167.847	79.556	44.992
	178.673	23.506	45.297
	175.438	46.889	46.657
	178.875	85.333	44.332
	178.382	83.889	46.514
	172.32	25.646	45.471
	171.978	84.667	47.818
	177.521	88.136	47.741
	188.091	38.333	48.886
	185.519	41.422	36.212
	177.002	41.683	46.319
	199.564	41.964	33.622
	192.667	41.982	52.885
	204	39.322	50.987
	193.982	35.62	54.286
	192.364	42.369	51.853
	197.16	46.039	52.382
	195.521	45.563	53.313
	203.049	62.125	50.904
	195.346	67.358	50.199
	201.095	69.125	21.027
	206.167	54.741	49.169
	201.73	57.357	53.982
	195.275	59.635	72.129
	175.414	39.336	52.347
	177.008	34.255	46.543
	179.202	58.561	47.916
	167.826	77.125	47.387
	172.553	35.156	45.552
	179.236	22.889	72.989
	173.697	20.556	69.124
	178.149	35.667	49.245
	192.416	58.356	41.29
	177.714	48.501	61.111
	178.223	36.026	26.267
	183.3	15.395	39.333
	184.686	15.693	42.154
	181.546	49.023	52.204
	190.672	52.197	22.679
	178.255	54.825	43.311
	190.32	62.636	29.289
	171.818	64.053	58.733
	168.522	43.446	34.222
	168.912	54.116	44.268
	194.491	33.535	54.956
	195.331	35.32	71.773
	182.552	53.75	33.333
	182.096	47.788	73.321
	182.272	55.845	56.918
	185.259	36.556	36.509
	179.896	21.333	36.029
	176.313	28.834	68.111
	182.919	23.62	63.667
	190.613	42.907	31.102
	171.732	40.778	72.244
	188.463	24.917	27.105
	191.779	19.15	46.444
	186.444	51.333	64.667
	189.344	52.149	51.386
	190.111	37.902	28.256
	184.889	13.667	58.667
	189.324	57.133	47.667
	197.612	52.17	22.824
	185.731	31.667	46.18
	194.73	36.659	43.667
	193.286	39.547	53.438
	191.842	44.882	20.845
	184.921	46.939	46.667
	190.968	50.423	31.82
	174.857	30.518	51.509
	172.359	22.952	46.304
	167.883	24.429	48.005
	157.018	67.305	43.867
	151.333	60.678	44.083
	173.107	28.259	35.688
	177.73	39.832	48.682
	180.953	52.291	48.88
	175.975	32.417	44.476
	184.705	53.444	46.983
	180.37	81.684	47.989
	178.234	19.091	46.871
	178.978	74.125	47.413
	176.202	54.369	47.223
	189.333	80.05	48.385
	172.266	85.556	47.159
	175.82	88.159	48.246
	182.57	89.486	48.741
	182.389	77.664	49.694
	173.678	80.551	49.008
	182.178	55.199	29.13
	161.231	54.5	28.667
	183.17	57.936	52.107
	191.4	53.45	55.828
	176.928	49.499	74.128
	192.674	46.605	57.27
	169.649	56.178	67.188
	168.835	40.904	19.02
	171.752	39.338	53.556
	185.381	53.019	43.722
	169.789	49.708	38.889
	174.336	46.571	30.714
	197.304	38	37.333
	180.229	47.769	42.462
	190.351	51.34	73.333
	170.235	36.444	17.778
	186.393	60.481	37.417
	194.605	58.962	29.625
	181.394	27.75	42.278
	187.878	61.51	11.693
	169.506	61.42	46.312
	174.28	45.444	63.066
	171.516	48.228	42.588
	183.047	60.785	43.508
	179.211	43.059	47.971
	177.967	65.833	48.074
	179.585	61.145	46.757
	179.889	60.333	47.048
	168.322	38.395	47.432
	180.714	36.292	43.083
	182.333	26.045	49.528
	181	46.22	47.56
	179	36.722	44.695
	174.56	74.389	47.714
	181.438	29.576	49.932
	175.773	26.611	50.128
	166.553	89.476	48.871
	173.333	99.667	43.511
	177	49.817	46.058
	172.389	76.774	46.956
	182.838	76.883	48.443
	177.474	82.297	0.48716
	186.899	47.294	46.415
	184.903	44.105	49.911
	175.072	47.567	48.615
	178.892	49.094	48.278
	180.051	48.397	49.826
	168.671	41.832	48.001
	164.928	41.046	46.506
	163.16	45.644	44.975
	182.246	43.805	46.18
	193.262	76.356	51.335
	190.552	73.091	23.41
	193.814	80.676	45.804
	197.671	85.991	44.283
	198.353	81.997	48.632
	201.243	85.324	50.817
	194.878	44.388	44.349
	176.347	44.72	25.8
	179.366	39.846	48.366
