# Supplementary material for: Graded titin cleavage progressively reduces tension and uncovers the source of A-band stability in contracting muscle
Source: eLife. 2020 Dec 24;9:e64107. doi: 10.7554/eLife.64107 (PMC7781594; doi:10.7554/eLife.64107)
Supplement: Figure 6—source data 1. [file elife-64107-fig6-data1.xlsx]

## Sheet: Figure 6B
	Fig. 6 B
	Active force data after 2 minutes of activation at pCa 5 before/after TEV-protease treatment (%)									Ordinary one-way ANOVA
	Wt-TEV	Wt+TEV	Het-TEV	Het+TEV	Hom-TEV	Hom+TEV				Table Analyzed	Fig. 6B
	98.2	96.8	94.77	87.88	94.1203	51.0742				Data sets analyzed	A-F
	96.91	96.6	100.8	72.19	97.9331	54.6446
	97.19	94.7	93.06	75.66	98.6618	47.885				ANOVA summary
	91.09	107.23	98.96	75.08	95.74	50.7626				F	66.45
	103.6	100.47	93.8	78.78	91.34	49.2108				P value	<0.0001
	97.75	90.88	98.29	59	106.2	48.8009				P value summary	***
		97.67	95.5	80.38	89	47.7267				Significant diff. among means (P < 0.05)?	Yes
				81.3		43.219				R square	0.8854
				84.3		41.9568
						62.2393				Brown-Forsythe test
						60.9064				F (DFn, DFd)	1.219 (5, 43)
						62.5525				P value	0.3167
						77.0058				P value summary	ns
										Are SDs significantly different (P < 0.05)?	No
Avg	97.4567	97.7643	96.4543	77.1744	96.1422	53.6911
Err	1.62566	1.92724	1.1003	2.78161	2.12153	2.68447				Bartlett's test
										Bartlett's statistic (corrected)	12.3
										P value	0.0308
										P value summary	*
										Are SDs significantly different (P < 0.05)?	Yes
										ANOVA table	SS	DF	MS	F (DFn, DFd)	P value
										Treatment (between columns)	16662	5	3332	F (5, 43) = 66.45	P<0.0001
										Residual (within columns)	2156	43	50.15
										Total	18818	48
										Data summary
										Number of treatments (columns)	6
										Number of values (total)	49
										Number of families	1
										Number of comparisons per family	15
										Alpha	0.05
										Tukey's multiple comparisons test	Mean Diff.	95.00% CI of diff.	Significant?	Summary	Adjusted P Value
										Wt-TEV vs. Wt+TEV	-0.3076	-12.06 to 11.44	No	ns	>0.9999	A-B
										Wt-TEV vs. Het-TEV	1.002	-10.75 to 12.75	No	ns	0.9998	A-C
										Wt-TEV vs. Het+TEV	20.28	9.152 to 31.41	Yes	***	<0.0001	A-D
										Wt-TEV vs. Hom-TEV	1.315	-10.43 to 13.06	No	ns	0.9994	A-E
										Wt-TEV vs. Hom+TEV	43.77	33.34 to 54.19	Yes	***	<0.0001	A-F
										Wt+TEV vs. Het-TEV	1.31	-9.978 to 12.60	No	ns	0.9993	B-C
										Wt+TEV vs. Het+TEV	20.59	9.948 to 31.23	Yes	***	<0.0001	B-D
										Wt+TEV vs. Hom-TEV	1.622	-9.666 to 12.91	No	ns	0.998	B-E
										Wt+TEV vs. Hom+TEV	44.07	34.17 to 53.97	Yes	***	<0.0001	B-F
										Het-TEV vs. Het+TEV	19.28	8.638 to 29.92	Yes	***	<0.0001	C-D
										Het-TEV vs. Hom-TEV	0.3121	-10.98 to 11.60	No	ns	>0.9999	C-E
										Het-TEV vs. Hom+TEV	42.76	32.86 to 52.66	Yes	***	<0.0001	C-F
										Het+TEV vs. Hom-TEV	-18.97	-29.61 to -8.325	Yes	***	<0.0001	D-E
										Het+TEV vs. Hom+TEV	23.48	14.33 to 32.64	Yes	***	<0.0001	D-F
										Hom-TEV vs. Hom+TEV	42.45	32.55 to 52.35	Yes	***	<0.0001	E-F
										Test details	Mean 1	Mean 2	Mean Diff.	SE of diff.	n1	n2	q	DF
										Wt-TEV vs. Wt+TEV	97.46	97.76	-0.3076	3.94	6	7	0.1104	43
										Wt-TEV vs. Het-TEV	97.46	96.45	1.002	3.94	6	7	0.3598	43
										Wt-TEV vs. Het+TEV	97.46	77.17	20.28	3.732	6	9	7.685	43
										Wt-TEV vs. Hom-TEV	97.46	96.14	1.315	3.94	6	7	0.4718	43
										Wt-TEV vs. Hom+TEV	97.46	53.69	43.77	3.495	6	13	17.71	43
										Wt+TEV vs. Het-TEV	97.76	96.45	1.31	3.785	7	7	0.4894	43
										Wt+TEV vs. Het+TEV	97.76	77.17	20.59	3.569	7	9	8.159	43
										Wt+TEV vs. Hom-TEV	97.76	96.14	1.622	3.785	7	7	0.606	43
										Wt+TEV vs. Hom+TEV	97.76	53.69	44.07	3.32	7	13	18.77	43
										Het-TEV vs. Het+TEV	96.45	77.17	19.28	3.569	7	9	7.64	43
										Het-TEV vs. Hom-TEV	96.45	96.14	0.3121	3.785	7	7	0.1166	43
										Het-TEV vs. Hom+TEV	96.45	53.69	42.76	3.32	7	13	18.22	43
										Het+TEV vs. Hom-TEV	77.17	96.14	-18.97	3.569	9	7	7.516	43
										Het+TEV vs. Hom+TEV	77.17	53.69	23.48	3.071	9	13	10.81	43
										Hom-TEV vs. Hom+TEV	96.14	53.69	42.45	3.32	7	13	18.08	43

## Sheet: Figure 6D
	Fig. 6 D
	MyHC/titin protein ratio									Ordinary one-way ANOVA
	WT+TEV	Het+TEV	Hom+TEV							Table Analyzed	Fig. 6D MyHC/titin protein ratio
	31.6999	12.9996	8.34555							Data sets analyzed	A-C
	15.4831	5.60593	27.1081
	3.64967	1.66945	2.02741							ANOVA summary
	6.92195	1.93208	4.31987							F	0.9774
	10.8505	6.15903	2.30296							P value	0.4044
										P value summary	ns
										Significant diff. among means (P < 0.05)?	No
										R square	0.1401
										Brown-Forsythe test
										F (DFn, DFd)	0.4459 (2, 12)
										P value	0.6504
										P value summary	ns
										Are SDs significantly different (P < 0.05)?	No
										Bartlett's test
										Bartlett's statistic (corrected)	2.711
										P value	0.2578
										P value summary	ns
										Are SDs significantly different (P < 0.05)?	No
										ANOVA table	SS	DF	MS	F (DFn, DFd)	P value
										Treatment (between columns)	164.5	2	82.24	F (2, 12) = 0.9774	P=0.4044
										Residual (within columns)	1010	12	84.14
										Total	1174	14
										Data summary
										Number of treatments (columns)	3
										Number of values (total)	15
										Number of families	1
										Number of comparisons per family	3
										Alpha	0.05
										Tukey's multiple comparisons test	Mean Diff.	95.00% CI of diff.	Significant?	Summary	Adjusted P Value
										WT+TEV vs. Het+TEV	8.048	-7.430 to 23.53	No	ns	0.3778	A-B
										WT+TEV vs. Hom+TEV	4.9	-10.58 to 20.38	No	ns	0.6836	A-C
										Het+TEV vs. Hom+TEV	-3.148	-18.63 to 12.33	No	ns	0.8521	B-C
										Test details	Mean 1	Mean 2	Mean Diff.	SE of diff.	n1	n2	q	DF
										WT+TEV vs. Het+TEV	13.72	5.673	8.048	5.802	5	5	1.962	12
										WT+TEV vs. Hom+TEV	13.72	8.821	4.9	5.802	5	5	1.195	12
										Het+TEV vs. Hom+TEV	5.673	8.821	-3.148	5.802	5	5	0.7673	12
	Titin/NEB protein ratio									Ordinary one-way ANOVA
	WT+TEV	Het+TEV	Hom+TEV							Table Analyzed	Fig. 6D Titin/NEB protein ratio
	6.33329	6.00943	4.9184							Data sets analyzed	A-C
	1.96532	3.58399	0.328881
	0.171375	0.29611	0.483727							ANOVA summary
	0.391772	0.661423	0.057354							F	0.2259
	0.638617	0.382703	0.169969							P value	0.8011
										P value summary	ns
										Significant diff. among means (P < 0.05)?	No
										R square	0.03628
										Brown-Forsythe test
										F (DFn, DFd)	0.1467 (2, 12)
										P value	0.8651
										P value summary	ns
										Are SDs significantly different (P < 0.05)?	No
										Bartlett's test
										Bartlett's statistic (corrected)	0.1857
										P value	0.9113
										P value summary	ns
										Are SDs significantly different (P < 0.05)?	No
										ANOVA table	SS	DF	MS	F (DFn, DFd)	P value
										Treatment (between columns)	2.624	2	1.312	F (2, 12) = 0.2259	P=0.8011
										Residual (within columns)	69.7	12	5.808
										Total	72.32	14
										Data summary
										Number of treatments (columns)	3
										Number of values (total)	15
										Number of families	1
										Number of comparisons per family	3
										Alpha	0.05
										Tukey's multiple comparisons test	Mean Diff.	95.00% CI of diff.	Significant?	Summary	Adjusted P Value
										WT+TEV vs. Het+TEV	-0.2867	-4.353 to 3.780	No	ns	0.9807	A-B
										WT+TEV vs. Hom+TEV	0.7084	-3.358 to 4.775	No	ns	0.8888	A-C
										Het+TEV vs. Hom+TEV	0.9951	-3.071 to 5.061	No	ns	0.7943	B-C
										Test details	Mean 1	Mean 2	Mean Diff.	SE of diff.	n1	n2	q	DF
										WT+TEV vs. Het+TEV	1.9	2.187	-0.2867	1.524	5	5	0.266	12
										WT+TEV vs. Hom+TEV	1.9	1.192	0.7084	1.524	5	5	0.6573	12
										Het+TEV vs. Hom+TEV	2.187	1.192	0.9951	1.524	5	5	0.9232	12
	MyHC/NEB protein ratio									Ordinary one-way ANOVA
	WT+TEV	Het+TEV	Hom+TEV							Table Analyzed	Fig. 6D MyHC/NEB protein ratio
	23.1144	10.0325	9.97163							Data sets analyzed	A-C
	13.6039	6.92456	1.42072
	5.43258	3.84931	4.03697							ANOVA summary
	6.06585	3.70789	1.55476							F	2.862
	6.92932	2.35708	0.391433							P value	0.0963
										P value summary	ns
										Significant diff. among means (P < 0.05)?	No
										R square	0.323
										Brown-Forsythe test
										F (DFn, DFd)	0.5859 (2, 12)
										P value	0.5718
										P value summary	ns
										Are SDs significantly different (P < 0.05)?	No
										Bartlett's test
										Bartlett's statistic (corrected)	3.191
										P value	0.2028
										P value summary	ns
										Are SDs significantly different (P < 0.05)?	No
										ANOVA table	SS	DF	MS	F (DFn, DFd)	P value
										Treatment (between columns)	154.4	2	77.21	F (2, 12) = 2.862	P=0.0963
										Residual (within columns)	323.7	12	26.97
										Total	478.1	14
										Data summary
										Number of treatments (columns)	3
										Number of values (total)	15
										Number of families	1
										Number of comparisons per family	3
										Alpha	0.05
										Tukey's multiple comparisons test	Mean Diff.	95.00% CI of diff.	Significant?	Summary	Adjusted P Value
										WT+TEV vs. Het+TEV	5.655	-3.108 to 14.42	No	ns	0.2374	A-B
										WT+TEV vs. Hom+TEV	7.554	-1.209 to 16.32	No	ns	0.0944	A-C
										Het+TEV vs. Hom+TEV	1.899	-6.864 to 10.66	No	ns	0.8341	B-C
										Test details	Mean 1	Mean 2	Mean Diff.	SE of diff.	n1	n2	q	DF
										WT+TEV vs. Het+TEV	11.03	5.374	5.655	3.285	5	5	2.435	12
										WT+TEV vs. Hom+TEV	11.03	3.475	7.554	3.285	5	5	3.252	12
										Het+TEV vs. Hom+TEV	5.374	3.475	1.899	3.285	5	5	0.8177	12
										Unpaired t test
										Column C	Hom+TEV
										vs.	vs.
										Column A	WT+TEV
										Unpaired t test
										P value	0.0805
										P value summary	ns
										Significantly different (P < 0.05)?	No
										One- or two-tailed P value?	Two-tailed
										t, df	t=2.000, df=8
										How big is the difference?
										Mean of column A	11.03
										Mean of column C	3.475
										Difference between means (C - A) ± SEM	-7.554 ± 3.777
										95% confidence interval	-16.26 to 1.157
										R squared (eta squared)	0.3333
										F test to compare variances
										F, DFn, Dfd	3.761, 4, 4
										P value	0.2276
										P value summary	ns
										Significantly different (P < 0.05)?	No
										Data analyzed
										Sample size, column A	5
										Sample size, column C	5

## Sheet: Figure 6D Gel
	Coomassie stained, 2.4 % polyacrylamide gel
