# Supplementary material for: Graded titin cleavage progressively reduces tension and uncovers the source of A-band stability in contracting muscle
Source: eLife. 2020 Dec 24;9:e64107. doi: 10.7554/eLife.64107 (PMC7781594; doi:10.7554/eLife.64107)
Supplement: Figure 7—source data 1. [file elife-64107-fig7-data1.xlsx]

## Sheet: Figure 7D
		Fig. 7 D
		GP to GP distance across A-band (nm)									Ordinary one-way ANOVA
		Het-TEV	Het+TEV	Hom+TEV							Table Analyzed	Fig. 7 D
		1693.75	1239.19	330							Data sets analyzed	A-C
		1720	1145.44	446
		1636.25	1100.29	621							ANOVA summary
		1626.25	1032.29	614							F	2756
		1567.5	1135.18	282							P value	<0.0001
		1561.25	1140.17	529							P value summary	***
		1558.75	1188.55	584							Significant diff. among means (P < 0.05)?	Yes
		1518.75	1330.31	494							R square	0.7864
		1503.75	1149.13	378
		1517.5	1105.37	531							Brown-Forsythe test
		1540	1170.36	551							F (DFn, DFd)	299.4 (2, 1497)
		1560	1217.27	361							P value	<0.0001
		1505	1191.01	361							P value summary	***
		1480	1129.34	327							Are SDs significantly different (P < 0.05)?	Yes
		1642.5	1101.84	271
		1580	1254.22	595							Bartlett's test
		1448.75	1263.14	853							Bartlett's statistic (corrected)	837.7
		1586.25	1210.88	481							P value	<0.0001
		1581.25	1137.12	365							P value summary	***
		1621.25	1381.9	429							Are SDs significantly different (P < 0.05)?	Yes
		1502.5	1272.24	734
		1520	1282.66	647							ANOVA table	SS	DF	MS	F (DFn, DFd)	P value
		1508.75	1159.65	710							Treatment (between columns)	149280134	2	74640067	F (2, 1497) = 2756	P<0.0001
		1582.5	1214.09	388							Residual (within columns)	40549090	1497	27087
		1526.25	1351.34	604							Total	189829224	1499
		1410	1270.45	656
		1497.5	1285.42	773							Data summary
		1617.5	1198.35	807							Number of treatments (columns)	3
		1626.25	1286.62	831							Number of values (total)	1500
		1607.5	1326.49	973
		1517.5	1319.89	709							Multiple comparisons
		1447.5	1191.35	807							Number of families	1
		1542.5	1239.49	907							Number of comparisons per family	3
		1592.5	1234.48	915							Alpha	0.05
		1523.75	1201.08	374
		1487.5	1290.97	420							Tukey's multiple comparisons test	Mean Diff.	95.00% CI of diff.	Significant?	Summary	Adjusted P Value
		1501.25	1246.8	442							Het-TEV vs. Het+TEV	262.4	238.0 to 286.8	Yes	***	<0.0001	A-B
		1535	1326.46	493							Het-TEV vs. Hom+TEV	760.6	736.2 to 785.1	Yes	***	<0.0001	A-C
		1590	1209.13	407							Het+TEV vs. Hom+TEV	498.2	473.8 to 522.7	Yes	***	<0.0001	B-C
		1601.25	1350.57	736
		1546.25	1287.32	325							Test details	Mean 1	Mean 2	Mean Diff.	SE of diff.	n1	n2	q	DF
		1395	1116.72	874							Het-TEV vs. Het+TEV	1568	1306	262.4	10.41	500	500	35.65	1497
		1566.25	1253.74	577							Het-TEV vs. Hom+TEV	1568	807.7	760.6	10.41	500	500	103.3	1497
		1598.75	1299.45	551							Het+TEV vs. Hom+TEV	1306	807.7	498.2	10.41	500	500	67.69	1497
		1647.5	1268.22	550
		1593.75	1260.7	775
		1648.75	1339.7	909
		1615	1275.35	449
		1616.25	1304.5	439
		1601.25	1298.8	762
		1561.25	1323.93	696
		1603.75	1337.27	436
		1476.25	1379.1	738
		1553.75	1371.6	606
		1408.75	1366.85	542
		1503.75	1294.45	969
		1537.5	1292.2	963
		1480	1355.41	883
		1491.25	1357.96	924
		1338.75	1311.13	687
		1512.5	1378.91	765
		1568.75	1378.11	814
		1592.5	1347.5	842
		1520	1502.41	897
		1546.25	1355.82	952
		1507.5	1450.46	94
		1452.5	1386.95	875
		1531.25	1424.1	640
		1556.25	1320.59	612
		1386.25	1357.69	502
		1432.5	1280.07	639
		1522.5	1312.98	676
		1563.75	1305.91	708
		1606.25	1315.99	533
		1668.75	1366.41	612
		1615	1413.8	583
		1485	1382.06	523
		1567.5	1473.59	617
		1518.75	1356.57	645
		1530	1340.65	675
		1557.5	1159.96	813
		1513.75	1298.12	663
		1490	1375.83	875
		1620	1299.08	845
		1561.25	1407.77	729
		1483.75	1362.07	701
		1580	1435.85	847
		1496.25	1325.02	819
		1553.75	1347.03	870
		1486.25	1365.49	810
		1332.5	1321.76	656
		1525	1313.08	829
		1495	1268.77	859
		1488.75	1284.13	795
		1510	1224.7	746
		1431.25	1127.32	749
		1583.75	1421.87	871
		1572.5	1341.79	937
		1518.75	1318.7	788
		1540	1412.95	683
		1607.5	1159.68	867
		1686.25	1174.82	552
		1607.5	1066.68	864
		1596.25	1058.6	915
		1596.25	1142.81	770
		1587.5	1145.47	754
		1587.5	1111.51	754
		1565	1183.22	609
		1567.5	1181.97	446
		1512.5	1215.65	336
		1527.5	1207.07	827
		1543.75	1213.88	765
		1543.75	1077.71	585
		1500	1217.47	633
		1525	1140.19	730
		1552.5	1182.99	762
		1503.75	1173.84	875
		1475	1324.01	733
		1556.25	1235.82	1031
		1626.25	1278.73	802
		1673.75	1228.35	846
		1533.75	1221.67	679
		1472.5	1143.59	720
		1498.75	1249.39	735
		1513.75	1310.56	574
		1480	1222.85	424
		1540	1220.22	1112
		1510	1380.48	950
		1563.75	1398.26	706
		1481.25	1184.68	610
		1540	1163.11	585
		1550	1281.46	530
		1577.5	1278.94	566
		1548.75	1255.89	497
		1502.5	1270.04	671
		1486.25	1288.01	802
		1495	1353.39	724
		1597.5	1264.69	547
		1530	1235.54	585
		1558.75	1297.9	795
		1567.5	1270.1	1063
		1607.5	1344.49	1065
		1523.75	1390.34	655
		1478.75	1395.73	633
		1598.75	1376.5	590
		1591.25	1283.62	636
		1596.25	1304.3	672
		1553.75	1386.72	699
		1601.25	1420.99	599
		1522.5	1406.44	908
		1573.75	1446.97	773
		1562.5	1427.23	631
		1567.5	1439.74	680
		1620	1468.96	781
		1566.25	1444.01	797
		1532.5	1456.85	636
		1565	1463.44	604
		1562.5	1438.79	658
		1542.5	1379.97	631
		1510	1505.13	663
		1507.5	1422.07	657
		1385	1332.54	601
		1508.75	1361.65	598
		1525	1324.06	668
		1510	1309.38	985
		1495	1359.98	638
		1527.5	1318.92	248
		1455	1294.69	800
		1538.75	1280.16	963
		1500	1370.99	759
		1486.25	1327.95	1116
		1560	1356.55	1050
		1548.75	1455.37	929
		1462.5	1343.53	904
		1486.25	1435.52	1288
		1540	1466.31	1046
		1518.75	1477.28	879
		1531.25	1484.01	917
		1452.5	1358.37	1047
		1536.25	1262.04	1226
		1361.25	1400.92	1135
		1593.75	1373.17	1066
		1540	1293.78	1072
		1567.5	1316.6	1050
		1466.25	1398.22	1157
		1562.5	1393.58	727
		1608.75	1391.23	720
		1477.5	1400.45	228
		1612.5	1360.6	1082
		1623.75	1201.93	780
		1546.25	1388.22	743
		1418.75	1288.71	846
		1577.5	1361.48	822
		1628.75	1363.7	775
		1426.25	1375.9	657
		1611.25	1332.33	702
		1555	1404.82	835
		1652.5	1477.93	618
		1590	1362.86	749
		1567.5	1431.78	886
		1586.25	1325.33	912
		1712.5	1078.69	861
		1583.75	1196.51	765
		1613.75	1294.38	803
		1670	1183.24	770
		1642.5	1174.49	830
		1597.5	1261.55	794
		1566.25	1266.19	558
		1582.5	1346.18	491
		1628.75	1286.6	443
		1606.25	1245.13	953
		1605	1217.86	725
		1631.25	1146.03	720
		1632.5	1441.12	765
		1642.5	1261.38	765
		1571.25	1171.42	904
		1585	1230.94	982
		1632.5	1269.35	1041
		1662.5	1333.48	1063
		1720	1194.87	559
		1761.25	1225.4	679
		1590	1253.51	751
		1543.75	1299.04	725
		1487.5	1196.12	650
		1437.5	1314.05	652
		1527.5	1319.16	1186
		1603.75	1291.51	1090
		1602.5	1253.87	454
		1658.75	1266.05	521
		1593.75	1131.53	457
		1593.75	1306.37	483
		1582.5	1285.09	623
		1500	1397.1	800
		1457.5	1424	598
		1483.75	1342.45	513
		1468.75	1325.63	478
		1597.5	1319.63	470
		1602.5	1374.37	378
		1645	1306.99	352
		1413.75	1312.11	397
		1527.5	1292.78	435
		1647.5	1391.6	400
		1680	1376.57	421
		1632.5	1360.77	483
		1565	1349.51	566
		1598.75	1407.09	478
		1487.5	1412.01	518
		1601.25	1382.11	564
		1546.25	1415.53	537
		1566.25	1419.19	578
		1328.75	1452.43	609
		1575	1454.95	472
		1596.25	1415.54	370
		1737.5	1422.72	400
		1602.5	1363.03	543
		1681.25	1472.88	453
		1652.5	1260.39	595
		1607.5	1386.12	648
		1553.75	1357.47	598
		1561.25	1369.52	416
		1540	1204.77	628
		1425	1349.25	603
		1682.5	1311.41	660
		1678.75	1247.35	771
		1641.25	1292.33	690
		1620	1389.38	834
		1647.5	1280.76	760
		1667.5	1365.19	1455
		1618.75	1253.51	1267
		1431.25	1246.52	1036
		1567.5	1259.57	655
		1598.75	1190.49	915
		1517.5	1560	645
		1601.25	1209.52	790
		1580	1380.37	894
		1463.75	1259.38	1016
		1507.5	1324.47	902
		1628.75	1347.47	1080
		1522.5	1333.98	765
		1443.75	1210.34	665
		1657.5	1390.42	723
		1665	1357.79	1055
		1552.5	1235.16	1382
		1577.5	1241.18	1393
		1623.75	1334.57	1425
		1622.5	1209.46	1548
		1445	1254.9	1318
		1572.5	1167.49	1304
		1741.25	1126.66	1412
		1642.5	1344.66	1363
		1611.25	1306.9	1270
		1538.75	1181.11	1049
		1597.5	1227.19	1218
		1591.25	1369.58	914
		1591.25	1197.83	927
		1591.25	1358.52	1362
		1591.25	1258.48	588
		1591.25	1221.4	801
		1591.25	1301.13	639
		1591.25	1380.42	1101
		1721.25	1273.9	977.24
		1607.5	1096.9	944.52
		1645	1121.95	1138.16
		1582.5	1162.48	727.88
		1620	1134.34	891
		1626.25	1183.99	855.98
		1682.5	1249.18	998.62
		1688.75	1209.32	931.24
		1600	1086.94	576.9
		1558.75	1294.58	650.44
		1551.25	1203.3	829.18
		1626.25	1178.19	796.94
		1650	1112.55	656.3
		1535	1231.88	708.64
		1527.5	1400.06	984.9
		1598.75	1286.78	654.78
		1565	1219.55	566.2
		1541.25	1238.23	728.6
		1637.5	1240.46	519.64
		1532.5	1221.59	568.96
		1557.5	1229.73	858.76
		1518.75	1369.74	786.58
		1617.5	1321.94	795.02
		1662.5	1224.42	631.14
		1646.25	1253.49	735.26
		1635	1282.24	625.22
		1586.25	1266.68	596.18
		1513.75	1332.81	555.44
		1551.25	1341.24	555.44
		1622.5	1297.15	517.88
		1580	1177.32	764.74
		1608.75	1219.67	861.36
		1653.75	1267.61	818.4
		1598.75	1206.74	1036.76
		1616.25	1223.07	885.48
		1607.5	1217.07	663.22
		1678.75	1289.02	866.84
		1732.5	1279.81	692.48
		1701.25	1413.59	584.96
		1553.75	1303.44	719.72
		1385	1205.44	674.28
		1460	1300.31	792.02
		1585	1304.91	646.72
		1633.75	1354.38	826.52
		1656.25	1363.69	877.76
		1471.25	1292.87	767.64
		1546.25	1393.76	824.62
		1598.75	1320.77	934.76
		1632.5	1321.87	809.82
		1662.5	1391.8	791.3
		1632.5	1347.57	1115.58
		1666.25	1392.56	1102.18
		1533.75	1332.25	996.02
		1500	1357.22	971.4
		1531.25	1447.31	861.36
		1460	1397.3	1091.02
		1506.25	1457.27	782.32
		1545	1389.53	837.26
		1753.75	1374.67	1272.06
		1698.75	1327.64	1272.36
		1590	1391.67	921.78
		1601.25	1363.19	938.76
		1677.5	1353.07	824.52
		1671.25	1322.51	791.3
		1707.5	1401.83	862.68
		1668.75	1273.21	1035.76
		1635	1301.82	1192.24
		1783.75	1295.97	972.08
		1810	1410.1	905.28
		1650	1345.55	1000.92
		1691.25	1352.7	845.24
		1762.5	1310.82	1081.48
		1716.25	1402.39	1109.36
		1520	1446.38	1137.72
		1701.25	1391.38	1151.32
		1675	1362.93	1044.02
		1696.25	1465.63	1012.56
		1638.75	1455.8	1165.54
		1685	1387.67	1211.12
		1725	1365.45	1344.46
		1722.5	1356.26	990.94
		1565	1302.92	1014.58
		1627.5	1392.8	1127.7
		1692.5	1417.7	868.52
		1610	1344.67	1014.58
		1475	1323.84	1151.46
		1612.5	1261.23	1204.98
		1726.25	1384.22	1313.58
		1617.5	1349.11	1301.46
		1582.5	1367.72	1010.6
		1610	1355.39	1173.2
		1602.5	1373.25	1017
		1733.75	1306.03	1127.78
		1697.5	1337.86	1257.72
		1568.75	1425.78	1007.66
		1642.5	1393.61	1152.78
		1553.75	1405.5	930.3
		1716.25	1308.26	905.28
		1617.5	1398.73	676.38
		1607.5	1334.65	1237.02
		1748.75	1109.87	644.26
		1800	1126.93	814.16
		1652.5	1101.59	891.96
		1737.5	1166.2	644.02
		1616.25	1267.66	714.48
		1748.75	1185.79	724.98
		1568.75	1261.3	779.2
		1560	1168.24	757.62
		1616.25	1178.27	731.64
		1585	1263.22	521
		1730	1240.92	492.92
		1642.5	1304.47	533.02
		1706.25	1230.91	646.22
		1712.5	1254.19	711.06
		1663.75	1261.24	757.08
		1617.5	1338.72	965.28
		1597.5	1279.11	630.58
		1617.5	1405.66	1105.52
		1778.75	1281.91	373.06
		1668.75	1298.48	677.22
		1533.75	1337.47	665.46
		1575	1335.85	743.44
		1631.25	1301.47	660.44
		1576.25	1296.91	669.7
		1553.75	1330.18	1032.22
		1661.25	1369.9	1223.72
		1476.25	1427.22	682.44
		1518.75	1351.8	840.38
		1598.75	1372.83	899.36
		1641.25	1359.23	634.1
		1567.5	1344.53	779.2
		1550	1413.85	721.82
		1702.5	1373.54	826.52
		1515	1353.73	678.96
		1566.25	1262.86	563.48
		1622.5	1275.43	627.94
		1345	1284.52	601.1
		1471.25	1291.82	517.88
		1496.25	1194.84	668.18
		1430	1293.46	748.66
		1578.75	1255.74	788.9
		1446.25	1152.33	876.08
		1550	1272.78	840.7
		1468.75	1368.55	708.44
		1498.75	1283.78	729.86
		1501.25	1261.72	587.94
		1493.75	1331.8	661.66
		1523.75	1275.03	958.66
		1550	1337.67	887.1
		1532.5	1419.89	834.52
		1475	1219.56	997.24
		1621.25	1332.49	1026.28
		1497.5	1354.03	1011.94
		1407.5	1266.4	1258.64
		1492.5	1314.23	868.52
		1508.75	1350.08	968.68
		1497.5	1421.73	938.84
		1540	1336.76	1008.72
		1367.5	1421.36	1133.5
		1493.75	1289.95	1390.04
		1510	1388.27	1052.52
		1507.5	1426.89	553.08
		1632.5	1454.32	899
		1462.5	1416.49	1111.92
		1532.5	1508.29	802.66
		1522.5	1405.37	1067.2
		1537.5	1439.33	1315.08
		1561.25	1365.52	1202.88
		1533.75	1459.33	1181.86
		1503.75	1464.11	1350.22
		1410	1418.75	1153.7
		1482.5	1419.86	1167.06
		1528.75	1352.23	1223.66
		1441.25	1208.06	1320.34
		1543.75	1283.72	1086.64
		1588.75	1265.78	1127
		1472.5	1272.05	1265.04
		1563.75	1250.78	1130.2
		1612.5	1331.1	1079.34
		1390	1311.59	1180.72
		1480	1354.45	1068.36
		1596.25	1468.66	1095.62
		1500	1432.78	1271.9
		1450	1291.7	1457.12
		1493.75	1330.92	1377.68
		1447.5	1128.1	1541.44
		1372.5	1124.06	1362.4
		1501.25	1109.57	1260.7
		1607.5	1127.54	1522.28
		1476.25	1227.67	1203.98
		1518.75	1416.85	1127.3
		1497.5	1332.17	1178.48
		1591.25	1350.82	1434.42
		1575	1414.46	1183.24
		1597.5	1327.04	1032.22
		1580	1314.95	874.64
		1500	1404.76	877
		1627.5	1359.36	1021.86
		1475	1411.25	954
		1575	1383.58	886.96
